# Supplementary material for: Prediction of type 2 diabetes risk in people with non-diabetic hyperglycaemia: model derivation and validation using UK primary care data
Source: PubMed Central journal article supplement (PMC7590356; doi:10.1136/bmjopen-2020-037937), 2020-10-23
Supplement: bmjopen-2020-037937.draft_revisions.pdf [file bmjopen-2020-037937.draft_revisions.pdf]

# BMJ Open

BMJ Open is committed to open peer review. As part of this commitment we make the peer review history of every article we publish publicly available.

When an article is published we post the peer reviewers' comments and the authors' responses online. We also post the versions of the paper that were used during peer review. These are the versions that the peer review comments apply to.

The versions of the paper that follow are the versions that were submitted during the peer review process. They are not the versions of record or the final published versions. They should not be cited or distributed as the published version of this manuscript.

BMJ Open is an open access journal and the full, final, typeset and author-corrected version of record of the manuscript is available on our site with no access controls, subscription charges or pay-per-view fees (<http://bmjopen.bmj.com>).

If you have any questions on BMJ Open's open peer review process please email [info.bmjopen@bmj.com](mailto:info.bmjopen@bmj.com)

# BMJ Open

## Prediction of Type 2 diabetes risk in people with non-diabetic hyperglycaemia: model derivation and validation using UK primary care data

|                               |                                                                                                                                                                                                                                                                                                                                                                                                    |
|-------------------------------|----------------------------------------------------------------------------------------------------------------------------------------------------------------------------------------------------------------------------------------------------------------------------------------------------------------------------------------------------------------------------------------------------|
| Journal:                      | <i>BMJ Open</i>                                                                                                                                                                                                                                                                                                                                                                                    |
| Manuscript ID                 | bmjopen-2020-037937                                                                                                                                                                                                                                                                                                                                                                                |
| Article Type:                 | Original research                                                                                                                                                                                                                                                                                                                                                                                  |
| Date Submitted by the Author: | 24-Feb-2020                                                                                                                                                                                                                                                                                                                                                                                        |
| Complete List of Authors:     | Coles, Briana; University of Leicester, Khunti, Kamlesh; University of Leicester, Department of Health Sciences Booth, Sarah; University of Leicester, Department of Health Sciences Zaccardi, Francesco; University of Leicester, Diabetes Research Centre Davies, Melanie; University of Leicester, Diabetes Research Centre Gray, Laura; University of Leicester, Department of Health Sciences |
| Keywords:                     | PUBLIC HEALTH, General diabetes < DIABETES & ENDOCRINOLOGY, PRIMARY CARE                                                                                                                                                                                                                                                                                                                           |
|                               |                                                                                                                                                                                                                                                                                                                                                                                                    |

SCHOLARONE™  
Manuscripts

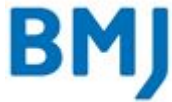

I, the Submitting Author has the right to grant and does grant on behalf of all authors of the Work (as defined in the below author licence), an exclusive licence and/or a non-exclusive licence for contributions from authors who are: i) UK Crown employees; ii) where BMJ has agreed a CC-BY licence shall apply, and/or iii) in accordance with the terms applicable for US Federal Government officers or employees acting as part of their official duties; on a worldwide, perpetual, irrevocable, royalty-free basis to BMJ Publishing Group Ltd ("BMJ") its licensees and where the relevant Journal is co-owned by BMJ to the co-owners of the Journal, to publish the Work in this journal and any other BMJ products and to exploit all rights, as set out in our [licence](#).

The Submitting Author accepts and understands that any supply made under these terms is made by BMJ to the Submitting Author unless you are acting as an employee on behalf of your employer or a postgraduate student of an affiliated institution which is paying any applicable article publishing charge ("APC") for Open Access articles. Where the Submitting Author wishes to make the Work available on an Open Access basis (and intends to pay the relevant APC), the terms of reuse of such Open Access shall be governed by a Creative Commons licence – details of these licences and which [Creative Commons](#) licence will apply to this Work are set out in our licence referred to above.

Other than as permitted in any relevant BMJ Author's Self Archiving Policies, I confirm this Work has not been accepted for publication elsewhere, is not being considered for publication elsewhere and does not duplicate material already published. I confirm all authors consent to publication of this Work and authorise the granting of this licence.

# Prediction of Type 2 diabetes risk in people with non-diabetic hyperglycaemia: model derivation and validation using UK primary care data

## Short running title

Type 2 diabetes risk prediction in people with non-diabetic hyperglycaemia

## Authors

Briana Coles<sup>1,3</sup>, Kamlesh Khunti<sup>1,3</sup>, Sarah Booth<sup>2</sup>, Francesco Zaccardi<sup>1,3</sup>, Melanie J Davies<sup>3</sup>, Laura J Gray<sup>2</sup>

## Affiliations

<sup>1</sup>Leicester Real World Evidence Unit, Diabetes Research Centre, University of Leicester, Leicester, UK.

<sup>2</sup>Department of Health Sciences, University of Leicester, Leicester, UK.

<sup>3</sup>Diabetes Research Centre, University of Leicester, Leicester General Hospital, Leicester, UK.

## Corresponding author

Briana Coles, bc188@leicester.ac.uk  
Gwendolen Rd, Leicester LE5 4PW, UK  
Tel: +44 (0) 734 213 7177  
Email: bc188@le.ac.uk

## Word count

Abstract: 272

Main Text: 4,340

Tables 4; RECORD checklist; TRIPOD checklist; ISAC application; Supplementary Tables 3; Supplementary Figures 4

## Keywords

Type 2 Diabetes Mellitus; Prediabetic State; Hyperglycaemia; Preventive Medicine; Preventive Health Services; Evidence-Based Practice; Risk prediction; biostatistics

**ABSTRACT**

**Objective:** Using primary care data, develop and validate sex-specific prognostic models that estimate the ten year risk of people with non-diabetic hyperglycaemia developing Type 2 diabetes.

**Design:** Retrospective cohort study

**Setting:** Primary care

**Participants:** 154,705 adult patients with non-diabetic hyperglycaemia

Primary outcome: Development of type 2 diabetes

**Methods:** This study used data routinely collected in UK primary care from general practices contributing to the Clinical Practice Research Datalink. Patients were split into development (n=109,077) and validation datasets (n=45,628). Potential predictor variables- including demographic and lifestyle factors, medical and family history, prescribed medications, and clinical measures- were included in survival models following the imputation of missing data. Measures of calibration at 10 years and discrimination were determined using the validation dataset.

**Results:** In the development dataset, 9,332 patients developed Type 2 diabetes during 293,238 person-years of follow-up (31.8 per 1,000 person-years). In the validation dataset, 3,783 patients developed Type 2 diabetes during 115,113 person-years of follow-up (32.9 per 1,000 person-years). The final prognostic models comprised 14 and 16 predictor variables for males and females, respectively. Both models had good calibration and high levels of discrimination. The performance statistics for the male model were: Harrell's C statistic of 0.700 in the development and 0.701 in the validation dataset, with a calibration slope of 0.974 in the validation dataset. For the female model, Harrell's C statistics were 0.720 and 0.718, respectively, while the calibration slope was 0.994 in the validation dataset.

1  
2  
3 **Conclusion:** These models could be used in primary care to identify those with non-diabetic  
4 hyperglycaemia most at risk of developing Type 2 diabetes for targeted referral to the National Health  
5 Service Diabetes Prevention Programme.  
6  
7  
8  
9  
10  
11  
12  
13  
14  
15  
16  
17  
18  
19  
20  
21  
22  
23  
24  
25  
26  
27  
28  
29  
30  
31  
32  
33  
34  
35  
36  
37  
38  
39  
40  
41  
42  
43  
44  
45  
46  
47  
48  
49  
50  
51  
52  
53  
54  
55  
56  
57  
58  
59  
60

For peer review only

**ARTICLE SUMMARY****Strengths**

- A large, representative primary care database was used to develop the models using HbA1c to quantify blood glucose.
- A range of predictors were considered specifically selected due to clinical relevance to development of Type 2 diabetes.

**Limitations**

- The cohort was split into development and validation datasets instead of using a fully external database to validate the model, but given the size of the cohort and the large number of events, this likely had little effect on model development.
- The outcome for this study was defined using a single medcode or test result indicating Type 2 diabetes.

## INTRODUCTION

People with blood glucose levels raised beyond normal but not high enough for a formal diagnosis of Type 2 diabetes (i.e. HbA1c 6.0-6.4% or 42-47 mmol/mol) are at high risk of eventually developing Type 2 diabetes. This high risk state has been termed non-diabetic hyperglycaemia (NDH) or prediabetes (1). In 2015 in England it was estimated that there were five million people aged 16 years and over with NDH, a prevalence of 11.4% (1). The prevalence was much lower in people younger than 40 years of age, with the exception of minority ethnic populations (1). Evidence from large-scale clinical trials has shown that the development of Type 2 diabetes can be delayed or even prevented if those with NDH are enrolled into a diabetes prevention programme (2, 3).

Diabetes prevention programmes encourage participants to change their behaviour with a focus on increasing physical activity, improving diet quality and reducing weight. These programmes have been developed and tested internationally (2, 4-6). Initially studies focused on very intensive programmes – for example a programme developed and tested within the US involved 16 one to one individualised sessions over six months, followed by monthly individual and group based sessions to reinforce messages (4). The trial found a 58% reduction in the risk of Type 2 diabetes in those randomised to receive the prevention programme compared to standard care. Other studies conducted in Finland and China with similar programmes found comparable results (5, 6). Such resource intensive programmes, although very effective, are not viable for delivery within an NHS setting.

Therefore, emphasis shifted to developing a more pragmatic programme that could be delivered in a group setting and requires less contact time. The National Health Service's Diabetes Prevention Programme (NHS DPP) launched in 2016 and is open to adults with NDH (7, 8). The NHS estimates that once the NHS DPP is fully rolled out in 2020, 100,000 people will access the programme each year (9). Based on this, it will take over 50 years for all those with NDH to access the programme.



1  
2  
3 Many prognostic and diagnostic models have been developed and validated for identifying those with  
4 undiagnosed Type 2 diabetes, NDH or those at risk of developing Type 2 diabetes (10-12). Evidence  
5 shows that the risk of developing Type 2 diabetes in those with NDH is variable. Some people with  
6 NDH will revert to normal glucose levels over time, with only a subset going on to develop Type 2  
7 diabetes (13). In the era of big data and personalised medicine, utilising data stored in primary care to  
8 target referrals to those at highest risk may be a more efficient use of the NHS DPP than the current  
9 blanket referral approach.  
10  
11  
12  
13  
14  
15  
16  
17  
18  
19  
20

21 To date no validated risk assessments for use in those with NDH have been developed for use in the  
22 UK. Therefore, we developed and validated sex-specific prognostic models to quantify the 10-year risk  
23 of those with NDH developing Type 2 diabetes using data routinely collected in primary care. Such  
24 models should be used to target referrals to the NHS DPP.  
25  
26  
27  
28  
29  
30  
31  
32  
33  
34  
35  
36  
37  
38  
39  
40  
41  
42  
43  
44  
45  
46  
47  
48  
49  
50  
51  
52  
53  
54  
55  
56  
57  
58  
59  
60

## METHODS

### Study design and data source

This observational retrospective cohort study included a sample of primary care patients from the UK who were registered with practices contributing to the Clinical Practice Research Datalink (CPRD). The CPRD includes anonymised primary care electronic health records for over 11.3 million patients from 674 UK practices dating back to 1987 (14). The CPRD includes data for approximately 6.9% of the UK population and is broadly representative of the age, sex and ethnicity of the UK general population (14). When available, patients were also linked to Office of National Statistics (ONS) to obtain the date of death and Hospital Episode Statistics (HES) to obtain ethnicity (both available for 59% of patients in the study cohort). Linked Index of Multiple Deprivation data (quintiles) were also obtained. Approval by the CPRD Independent Scientific Advisory Committee was granted for this study (approved protocol number 18\_238).

This study included an open cohort of patients registered in CPRD aged 18 years or older with NDH. NDH was defined as an HbA1c measure within 42-47 mmol/mol (6.0-6.4%). For each patient, the index date was defined as the first recorded test measurement indicating NDH between January 1, 2000 and December 31, 2017. Patients with a diagnosis of Type 2 or Type 1 diabetes before the index date were excluded. Patients with an HbA1c measure greater than 47 mmol/mol (6.4%) before the index date were also excluded as these patients were assumed to be in the process of confirming a diagnosis of Type 2 diabetes. Patients prescribed metformin, the current first line therapy for Type 2 diabetes, were also excluded. Patients were followed up for a maximum of 10 years until diagnosis of Type 2 diabetes, or censoring (transferring out of practice, death, or the end of study on December 31, 2017, whichever came first).

1  
2  
3 The cohort was split into a development and validation dataset. To split the cohort, practices of  
4 registration were stratified by region and patients were clustered by practice (Supplementary Table  
5 S1). Approximately 33% of practices in each region were randomly assigned to the validation dataset.  
6  
7  
8  
9

### 10 11 12 **Sample size**

13  
14 There were 71,063 males and 83,642 females meeting the inclusion criteria (Supplementary Figure  
15 S1). This resulted in 50,049 males and 59,028 females in the development dataset and 21,014 males  
16 and 24,614 females in the validation dataset. Within the development dataset, 4,719 males and 4,613  
17 females developed Type 2 diabetes. Riley *et al.* have proposed an approach for calculating the  
18 minimum number of events per predictor parameter for a survival model based on the model's  
19 anticipated R squared, event rate, follow up time and number of predictor parameters (15). We used  
20 the R squared, event rate, and mean follow up for men and women from a similar study to estimate  
21 the required sample size.(16) For women, based on 31 predictor parameters (deprivation has five  
22 categories) considered for our study, the required minimum sample size was 3,406. For men, based  
23 on 29 predictor parameters considered for our study, the required minimum sample size was 2,585.  
24  
25  
26  
27  
28  
29  
30  
31  
32  
33  
34  
35  
36  
37  
38

### 39 **Outcome**

40  
41 The outcome was the first diagnosis of Type 2 diabetes recorded within the CPRD between January 1,  
42 2000 and December 31, 2017. The first diagnosis of Type 2 diabetes was identified by medcode; HbA1c  
43 measure greater than 47 mmol/mol (6.4%); random blood glucose measure greater than 11.0 mmol/L  
44 (199 mg/dL); or fasting plasma glucose measure greater than 6.9 mmol/L.  
45  
46  
47  
48  
49  
50  
51

### 52 **Predictor variables**

53  
54 We examined potential predictor variables based on established risk factors for Type 2 diabetes and  
55 those risk factors included in existing risk scores for Type 2 diabetes related outcomes (10-12, 16, 17).  
56  
57 Table 1 shows the predictor variables considered.  
58  
59  
60

**Table 1.** Potential predictor variables

| Demographic information                     |                                  |
|---------------------------------------------|----------------------------------|
| Age                                         | Ethnicity                        |
| Sex                                         | Deprivation                      |
| Medical/family history                      |                                  |
| Family history of diabetes                  | Polycystic ovary syndrome (PCOS) |
| Cardiovascular disease                      | Sleep apnoea                     |
| Schizophrenia or bipolar affective disorder | Depression                       |
| Learning disabilities                       | Renal/kidney disease             |
| Gestational diabetes                        |                                  |
| Prescribed medications                      |                                  |
| Antihypertensives                           | Statins                          |
| Corticosteroids                             | Aspirin                          |
| Second generation "atypical" antipsychotics |                                  |
| Clinical measurements                       |                                  |
| HbA1c                                       | Pulse rate                       |
| Body mass index (BMI)                       | Serum cholesterol                |
| Systolic blood pressure                     | Liver function test              |
| Diastolic blood pressure                    | Waist circumference              |
| Lifestyle factors                           |                                  |
| Smoking status                              | Alcohol use                      |

Data on demographic factors, medical and family history, prescribed medications, clinical measurements, and lifestyle factors were obtained from CPRD (and HES for ethnicity). Age in single years at the index date was used. Ethnicity was derived from HES as white or non-white and when unavailable, the most recent code in CPRD was used. Deprivation was measured using the 2010 Index of Multiple Deprivation quintiles (1=least material deprivation; 5=most material deprivation). The closest value to the index date was selected for continuous measures including BMI, systolic and diastolic blood pressure, pulse rate, serum cholesterol, liver function test, and waist circumference, restricting to values recorded within six months before the index date. BMI is automatically calculated within the medical record based on input height and weight. Biologically implausible values were excluded including serum cholesterol outside of 1-15 mmol/L, systolic blood pressure outside of 20-250 mmHg, diastolic blood pressure outside of 30-150 mmHg, and BMI outside of 9-96 kg/m<sup>2</sup>. Prescribed medications (yes or no) were determined from one or more prescription records within six months before the index date. Alcohol use (entity type=5) and smoking (entity type=4) were defined using records indicating current smoking or alcohol use within one year before the index date. All

1  
2  
3 others were considered non-current smokers and/or alcohol users- including former smokers and/or  
4 alcohol users. Medical and family history was determined from a diagnosis code before the index date.  
5  
6  
7  
8  
9

### 10 **Handling of missing data**

11  
12 Potential predictor variables with missing data for more than 33.3% of the study cohort were  
13 excluded, as these are most likely not collected as part of routine primary care (Supplementary Table  
14 S2). Assuming data were missing at random and based on previous research, multiple imputation was  
15 used to generate five imputed datasets (16, 18). Missing ethnicity (white or non-white), serum  
16 cholesterol, and systolic and diastolic blood pressure were imputed using chained equations.  
17  
18  
19  
20  
21  
22  
23  
24  
25

### 26 **Development of the models**

27  
28 Modelling was performed using the Stata `stpm2` command for fitting flexible parametric survival  
29 models on the log cumulative hazard scale (19). Null flexible parametric models were fitted to estimate  
30 Type 2 diabetes risk using between one and five degrees of freedom to model the baseline hazard  
31 function: the final degrees of freedom was determined from visual examination of the plots of the  
32 baseline hazard functions as well as Akaike information criterion (AIC) and Bayesian information  
33 criterion (BIC) statistics. Multivariable fractional polynomial models were considered that included  
34 fractional polynomial transformations of potential continuous predictor variables. This process selects  
35 fractional polynomial models that best predict the outcome of interest. Then, manual backwards  
36 stepwise selection was used to eliminate variables that did not contribute significantly to the model  
37 using a significance threshold typical for prognostic model research of  $p=0.20$  (20). Clinically relevant  
38 variables determined *a priori* including HbA1c, sex, and age were forced to remain in the model  
39 regardless of the p-value.  
40  
41  
42  
43  
44  
45  
46  
47  
48  
49  
50  
51  
52  
53  
54  
55  
56

57 From here, two separate sex-specific models were developed. The model for females considered all  
58 of the potential predictor variables available for at least 66.6% of the study cohort. The model for  
59  
60

1  
2  
3 males did not include polycystic ovarian syndrome or gestational diabetes as potential predictor  
4 variables. The following steps were followed separately for the male and female models: 1) flexible  
5 parametric modelling was used to fit the final prognostic model and Rubin's rules were applied to  
6  
7 combine the results across the imputed datasets; 2) the linear predictor was calculated for each  
8 patient; 3) Harrell's C statistics, Somers' D statistics, and calibration slopes were calculated for each  
9 imputed dataset and averaged (21).

### 17 18 19 **Validation of the models**

20  
21 The models were internally validated to correct for over-fitting. Internal validation was performed  
22 separately for the male and female models. The same methodology used for multiple imputation in  
23 the development dataset was used for the validation dataset. Internal validation was performed as  
24 described by Harrell *et al.* and Snee (22, 23). The developed model was applied to the validation  
25 dataset and the performance was quantified (22). A global shrinkage factor (the mean calibration  
26 slope) was applied to the beta coefficients from the developed model. The restricted cubic splines and  
27 constant were re-estimated to maintain overall calibration (24).

28  
29  
30 Four risk groups (high, medium high, medium low, and low) were defined by the 25<sup>th</sup>, 50<sup>th</sup> and 75<sup>th</sup>  
31 percentiles of the linear predictor (the model's prognostic index distribution). A Kaplan–Meier  
32 curve was plotted for all four groups. Discrimination was visualised by the difference in observed Type  
33  
34  
35  
36  
37  
38  
39  
40  
41  
42  
43  
44  
45  
46  
47  
48  
49  
50  
51  
52  
53  
54  
55  
56  
57  
58  
59  
60  
2 diabetes-free probability among the groups.

To evaluate the calibration, each imputed dataset was divided into deciles based on the linear  
predictor of Type 2 diabetes risk. The predicted probability of developing Type 2 diabetes (x-axis) and  
the observed fraction that developed Type 2 diabetes at 10 years (y-axis) were plotted for each decile  
risk group. The slope of this line is the calibration slope; a reference line showing perfect calibration  
was also plotted.

1  
2  
3  
4  
5 All analyses were performed in Stata 15 and SAS v9.4; nominal statistical significance was defined at  
6  
7  
8 p<0.05.  
9

### 10 11 12 **Patient and public involvement** 13

14 Members of the public were involved in the priority-setting and question-development stages of this  
15  
16 study.  
17  
18  
19  
20  
21  
22  
23  
24  
25  
26  
27  
28  
29  
30  
31  
32  
33  
34  
35  
36  
37  
38  
39  
40  
41  
42  
43  
44  
45  
46  
47  
48  
49  
50  
51  
52  
53  
54  
55  
56  
57  
58  
59  
60

For peer review only

## RESULTS

### Study population

A total of 289,754 adult patients were identified from CPRD with an HbA1c test result indicating NDH on or before December 31, 2017. Patients were excluded if they had pre-existing Type 2 diabetes (n=58,296) or Type 1 diabetes (n=822). Patients with one or more prescriptions for metformin within six months before the index date were also excluded (n=10,260). Patients were further excluded if the first recorded test indicating NDH occurred before the start of the study on January 1, 2000 (n=65,370), or if the date of death preceded the date of the first recorded test indicating NDH (n=301) as these data were likely misreported. There were 154,705 patients that met the inclusion criteria and were included in the cohort (Supplementary Figure S1); 109,077 patients were included in the development dataset (50,049 males and 59,028 females) and 45,628 patients in the validation dataset (21,014 males and 24,614 females).

In the development dataset, there were 9,332 patients, including 4,719 males and 4,613 females, diagnosed with Type 2 diabetes during a total of 293,238 person-years of follow-up. The mean follow-up for the development dataset was 2.7 years (SD 2.4, range 0-10 years). In the validation dataset, there were 3,783 patients, including 1,893 males and 1,890 females, diagnosed with Type 2 diabetes during a total of 115,113 person-years of follow-up. The mean follow-up for the validation dataset was 2.5 years (SD 2.3, range 0-10 years).

### Baseline characteristics

Table 2 shows the baseline characteristics of patients in the development and validation datasets and for patients with no missing data. The distributions of continuous variables in the development and validation datasets are shown in Supplementary Figure S2.



**Table 2.** Characteristics of cohort at the index date in total, by number of missing variables, and by dataset.

|                        |                         | Total            | Missing variables |                | Dataset        |                |
|------------------------|-------------------------|------------------|-------------------|----------------|----------------|----------------|
|                        |                         |                  | One or more       | None           | Development    | Validation     |
| Total                  |                         | N=154,705        | N=91,409          | N=63,296       | N=109,077      | N=45,628       |
| Age (years)            |                         | 64.9 (14.2)      | 64.2 (14.9)       | 65.9 (13.1)    | 64.8 (14.2)    | 65.0 (14.2)    |
| Sex                    | Male                    | 71,063 (45.9%)   | 40,518 (44.3%)    | 30,545 (48.3%) | 50,049 (45.9%) | 21,014 (46.1%) |
|                        | Female                  | 83,642 (54.1%)   | 50,891 (55.7%)    | 32,751 (51.7%) | 59,028 (54.1%) | 24,614 (53.9%) |
| Ethnicity              | Non-white               | 14,116 (12.4%)   | 6,683 (13.3%)     | 7,433 (11.7%)  | 10,239 (12.9%) | 3,877 (11.2%)  |
|                        | White                   | 99,468 (87.6%)   | 43,605 (86.7%)    | 55,863 (88.3%) | 68,870 (87.1%) | 30,598 (88.8%) |
|                        | Unknown                 | 41,121           | 41,121            | 0              | 29,968         | 11,153         |
| Current alcohol user   |                         | 31,722 (20.5%)   | 14,867 (16.3%)    | 16,855 (26.6%) | 22,320 (20.5%) | 9,402 (20.6%)  |
| Current smoker         |                         | 21,126 (13.7%)   | 11,677 (12.8%)    | 9,449 (14.9%)  | 14,861 (13.6%) | 6,265 (13.7%)  |
| Medication             | Antihypertensives       | 90,005 (58.2%)   | 47,424 (51.9%)    | 42,581 (67.3%) | 63,290 (58.0%) | 26,715 (58.5%) |
|                        | Atypical antipsychotics | 3,959 (2.6%)     | 2,541 (2.8%)      | 1,418 (2.2%)   | 2,845 (2.6%)   | 1,114 (2.4%)   |
|                        | Aspirin                 | 41,986 (27.1%)   | 22,404 (24.5%)    | 19,582 (30.9%) | 29,726 (27.3%) | 12,260 (26.9%) |
|                        | Corticosteroids         | 55,090 (35.6%)   | 33,167 (36.3%)    | 21,923 (34.6%) | 38,918 (35.7%) | 16,172 (35.4%) |
|                        | Statins                 | 74,166 (47.9%)   | 39,425 (43.1%)    | 34,741 (54.9%) | 52,393 (48.0%) | 21,773 (47.7%) |
| Medical/family history | Schizophrenia/bipolar   | 2,093 (1.4%)     | 1,189 (1.3%)      | 904 (1.4%)     | 1,493 (1.4%)   | 600 (1.3%)     |
|                        | Cardiovascular disease  | 18,483 (11.9%)   | 9,608 (10.5%)     | 8,875 (14.0%)  | 12,862 (11.8%) | 5,621 (12.3%)  |
|                        | Depression              | 42,364 (27.4%)   | 26,066 (28.5%)    | 16,298 (25.7%) | 29,627 (27.2%) | 12,737 (27.9%) |
|                        | Learning disability     | 744 (0.5%)       | 446 (0.5%)        | 298 (0.5%)     | 478 (0.4%)     | 266 (0.6%)     |
|                        | Diabetes in family      | 195 (0.1%)       | 117 (0.1%)        | 78 (0.1%)      | 159 (0.1%)     | 36 (0.1%)      |
|                        | PCOS                    | 840 (0.5%)       | 595 (0.7%)        | 245 (0.4%)     | 576 (0.5%)     | 264 (0.6%)     |
|                        | Gestational diabetes    | 762 (0.5%)       | 592 (0.6%)        | 170 (0.3%)     | 567 (0.5%)     | 195 (0.4%)     |
|                        | Renal/kidney disease    | 17,126 (11.1%)   | 9,109 (10.0%)     | 8,017 (12.7%)  | 11,810 (10.8%) | 5,316 (11.7%)  |
|                        | Sleep apnoea            | 2,289 (1.5%)     | 1,317 (1.4%)      | 972 (1.5%)     | 1,594 (1.5%)   | 695 (1.5%)     |
|                        | Clinical measures       | HbA1c (mmol/mol) | 43.5 (1.5)        | 43.5 (1.5)     | 43.5 (1.5)     | 43.5 (1.5)     |
| Cholesterol (mmol/L)   |                         | 5.2 (1.2)        | 5.3 (1.2)         | 5.2 (1.2)      | 5.2 (1.2)      | 5.2 (1.2)      |
| Systolic BP (mmHg)     |                         | 138.1 (18.5)     | 137.8 (18.8)      | 138.2 (18.4)   | 138.0 (18.6)   | 138.2 (18.5)   |
| Diastolic BP (mmHg)    |                         | 80.0 (11.0)      | 79.6 (11.0)       | 80.2 (11.0)    | 79.9 (11.0)    | 80.1 (10.9)    |

BP=blood pressure. PCOS= Polycystic ovarian syndrome. Continuous variables are given as the mean (SD). Categorical variables are given as the number (%). Index of multiple deprivation, BMI, pulse, liver function test, and waist circumference are not included in the table since these measures are not available for >33.3% of the cohort.

1  
2  
3 The development dataset included 54.1% female and 12.9% non-white ethnicity; corresponding  
4 values in the validation dataset were 53.9% and 11.2%. Within the development dataset, 20.5% of  
5 patients were current alcohol users and 13.6% were current smokers compared with 20.6% and 13.7%,  
6 respectively, within the validation dataset. The percentage of patients with prescriptions of each  
7 medication was similar between the development and validation datasets. The most commonly  
8 prescribed medication was antihypertensives (58.0% in the development and 58.5% in the validation  
9 dataset), while the least common was atypical antipsychotics (2.6% and 2.4%, respectively). Of the  
10 38,918 patients prescribed corticosteroids in the development dataset, 10,711 (27.5%) were  
11 prescribed oral medication, 19,192 were non-oral (49.3%), and 9,015 were prescribed both (23.2%;  
12 data not shown). For the validation dataset, there were 16,172 patients prescribed corticosteroids  
13 including 4,637 (28.7%) oral, 7,781 (48.1%) non-oral, and 3,754 prescribed both (23.2%). The  
14 medical/family history was similar between the development and validation datasets. The most  
15 common medical/family history condition was depression (27.2% in the development and 27.9% in  
16 the validation dataset), while the least common was a family history of diabetes (0.1% in both  
17 datasets). The mean HbA1c at the index date was the same for development and validation patients,  
18 43.5mmol/mol (SD 1.2) or 6.1% (0.1%). Further, observed cholesterol and blood pressure were similar  
19 between the development and validation datasets.  
20  
21  
22  
23  
24  
25  
26  
27  
28  
29  
30  
31  
32  
33  
34  
35  
36  
37  
38  
39  
40  
41  
42

### 43 **Incidence rates of Type 2 diabetes**

44  
45 Supplementary Table S3 shows the incidence of Type 2 diabetes in total and in the development and  
46 validation datasets. The total incidence of Type 2 diabetes was 32.1 (95% CI 31.6-32.7) per 1,000  
47 person-years (py): 31.8 (95% CI 31.2-32.5) in the development and 32.9 (95% CI 31.8-33.9) in the  
48 validation dataset. The largest rate difference between the development and validation datasets was  
49 for patients with a history of learning disability; the rate was 30.0 (95% CI 21.1-42.7) per 1,000 py in  
50 the development dataset compared with 41.2 (95% CI 27.6-61.5) in the validation dataset.  
51  
52  
53  
54  
55  
56  
57  
58  
59  
60

### Predictor variables

Variables missing for more than 33.3% of the study cohort were eliminated as potential predictor variables including waist circumference (missing for 99.3% of patients), liver function test (99.2% missing), pulse rate (86.5% missing), BMI (73.6% missing), and deprivation (41.1% missing).

For flexible parametric modelling, three degrees of freedom were selected for the restricted cubic spline function used for the baseline hazard (AIC= 81,482, BIC= 81,520). This places two knots at percentile positions 33 and 67 of the distribution of the uncensored log survival times. Linear was the best fit for all continuous potential predictor variables; no fractional polynomial transformations were selected.

The following potential predictor variables were removed during the backwards selection process: atypical antipsychotics, cholesterol, history of a learning disability, a history of depression, a history of schizophrenia or bipolar affective disorder, and ethnicity. The final male model comprised 14 predictor variables including HbA1c, systolic blood pressure, diastolic blood pressure, age, smoking, alcohol use; prescribed medications: antihypertensives, aspirin, corticosteroids, statins; and medical history of: cardiovascular disease, renal/kidney disease, sleep apnoea; and family history of diabetes (Table 3). The female model included two additional predictors, medical history of polycystic ovarian syndrome and gestational diabetes (Table 3).

**Table 3.** Development and final coefficients for the male and female prognostic models.

| Predictor                       | Male              |           |           |         |             | Female            |           |           |         |             |
|---------------------------------|-------------------|-----------|-----------|---------|-------------|-------------------|-----------|-----------|---------|-------------|
|                                 | Development model |           |           |         | Final model | Development model |           |           |         | Final model |
|                                 | Coefficient       | 95% CI    |           | p value | Coefficient | Coefficient       | 95% CI    |           | p value | Coefficient |
| HbA1c (mmol/mol)                | 0.35048           | 0.33231   | 0.36866   | 0.000   | 0.34124     | 0.38494           | 0.36673   | 0.40315   | 0.000   | 0.38255     |
| Age                             | -0.00310          | -0.00579  | -0.00040  | 0.024   | -0.00302    | -0.00465          | -0.00737  | -0.00193  | 0.001   | -0.00462    |
| Current alcohol user            | 0.05866           | -0.00659  | 0.12391   | 0.078   | 0.05711     | 0.03588           | -0.03874  | 0.11050   | 0.346   | 0.03566     |
| Current smoker                  | -0.13053          | -0.21393  | -0.04714  | 0.002   | -0.12709    | -0.11355          | -0.20407  | -0.02302  | 0.014   | -0.11284    |
| Antihypertensive                | 0.13787           | -0.03490  | 0.31064   | 0.118   | 0.13423     | 0.23830           | -0.01509  | 0.49169   | 0.065   | 0.23682     |
| Aspirin                         | 0.10917           | 0.04131   | 0.17703   | 0.002   | 0.10629     | 0.13078           | 0.06142   | 0.20015   | 0.000   | 0.12997     |
| Corticosteroids                 | 0.13683           | 0.07441   | 0.19926   | 0.000   | 0.13322     | 0.12593           | 0.05951   | 0.19234   | 0.000   | 0.12515     |
| Statins                         | 0.65113           | 0.58046   | 0.72180   | 0.000   | 0.63396     | 0.66886           | 0.60170   | 0.73603   | 0.000   | 0.66471     |
| Cardiovascular disease          | -0.08578          | -0.16955  | -0.00201  | 0.045   | -0.08352    | -0.11919          | -0.22249  | -0.01590  | 0.024   | -0.11845    |
| Diabetes in family              | 0.65379           | 0.10842   | 1.19917   | 0.019   | 0.63655     | 0.37641           | -0.31827  | 1.07110   | 0.288   | 0.37408     |
| Polycystic ovarian syndrome     | -                 | -         | -         | -       | -           | 0.22766           | -0.08223  | 0.53755   | 0.150   | 0.22625     |
| Gestational diabetes            | -                 | -         | -         | -       | -           | 0.49865           | 0.24068   | 0.75661   | 0.000   | 0.49555     |
| Renal/kidney disease            | -0.05138          | -0.15758  | 0.05481   | 0.343   | -0.05003    | -0.13741          | -0.23253  | -0.04229  | 0.005   | -0.13655    |
| Sleep apnoea                    | 0.08901           | -0.09730  | 0.27532   | 0.349   | 0.08666     | 0.35832           | 0.04615   | 0.67048   | 0.024   | 0.35609     |
| Systolic blood pressure (mmHg)  | 0.00594           | 0.00383   | 0.00805   | 0.000   | 0.00578     | 0.00599           | 0.00347   | 0.00852   | 0.000   | 0.00596     |
| Diastolic blood pressure (mmHg) | 0.00359           | 0.00009   | 0.00708   | 0.044   | 0.00349     | 0.00053           | -0.00333  | 0.00439   | 0.784   | 0.00053     |
| Restricted cubic spline 1       | 0.96661           | 0.94161   | 0.99160   | 0.000   | 0.96661     | 0.93046           | 0.90612   | 0.95481   | 0.000   | 0.93046     |
| Restricted cubic spline 2       | -0.03565          | -0.05114  | -0.02016  | 0.000   | -0.03565    | -0.02957          | -0.04468  | -0.01445  | 0.000   | -0.02957    |
| Restricted cubic spline 3       | 0.03708           | 0.02516   | 0.04901   | 0.000   | 0.03708     | 0.01933           | 0.00740   | 0.03127   | 0.002   | 0.01933     |
| Constant                        | -19.55409         | -20.40687 | -18.70131 | 0.000   | -19.55409   | -20.84774         | -21.70300 | -19.99247 | 0.000   | -20.84774   |

### Calibration

Using the developed model, Supplementary Figure S3 shows an example of the calibration between expected and observed probabilities of developing Type 2 diabetes at 10 years of follow up within one of the imputed female and male validation datasets. There were slight differences between plots from the different imputed datasets due to the different values imputed for predictors. Using Rubin's rules to combine the results across imputed datasets, the calibration slope was 0.974 (95% CI 0.905-1.042) for males and 0.994 (95% CI 0.931-1.057) for females. This indicates that the developed models were slightly overfitted. A uniform shrinkage factor ( $S=0.974$  for males and  $S=0.994$  for females) was applied to each developed model's beta coefficients before recalibrating the baseline function of the final model.

### Discrimination

There was relatively good separation, or discrimination, between risk groups for both males and females when the developed models were fitted using the validation dataset. Supplementary Figure S4 shows an example using one of the imputed validation datasets. There were slight differences between plots from the different imputed datasets due to the different values imputed for predictors. For both males and females, the log-rank test for all imputed datasets indicated that the survivor functions were different between risk groups ( $p<0.001$  for both males and females). Furthermore, validation showed that the male model discriminated reasonably well with mean Harrell's C statistic across imputed datasets of 0.701 and Somers' D statistic of 0.402; for the female model, the corresponding statistics were 0.718 and 0.436 (Table 4). These values suggest slightly better discrimination for the female model.

**Table 4.** Male and female prognostic model mean performance statistics across imputed datasets.

| Measure           | Male        |            | Female      |            |
|-------------------|-------------|------------|-------------|------------|
|                   | Development | Validation | Development | Validation |
| Harrell's C       | 0.700       | 0.701      | 0.720       | 0.718      |
| Somers' D         | 0.401       | 0.402      | 0.441       | 0.436      |
| Calibration slope | 1.000       | 0.974      | 1.000       | 0.994      |

For peer review only

## DISCUSSION

Although several prognostic and diagnostic models for predicting Type 2 diabetes-related outcomes have been developed and validated within the UK, none to date has been specifically developed in a population with NDH, for whom the risk profile is likely different than the general population. The available evidence shows that the incidence of Type 2 diabetes in the cohort of patients used to develop the QDiabetes-2018 risk assessment tool was 4.17 (95% CI 4.15 to 4.19) per 1,000 person-years (16). Those included in our study were significantly more likely to develop Type 2 diabetes. In fact, the incidence in our development cohort was nearly eight times that of the QDiabetes-2018 development cohort. Therefore, we have developed and validated pragmatic sex-specific prognostic models for predicting the risk of developing Type 2 diabetes in those with NDH, which could be used for targeting referral to the NHS DPP. Our models include important risk factors for people that already have NDH.

Since the primary aim of this study was to develop models that could be easily implemented using routinely collected data, in the variable selection process we closely considered data availability and excluded variables with high levels of missing data, including waist circumference, liver function, pulse rate, BMI, and deprivation. Waist circumference and BMI are key risk factors for Type 2 diabetes, but these measures may not be obtained due to lack of time and other practical or perceived barriers (24). BMI, in particular, has been included in many existing Type 2 diabetes models (10). However, the inclusion of BMI must be balanced with practicality, given that our data showed BMI (or height and weight) were infrequently recorded in a primary care setting.

Since the models were developed using observational primary care data, the accuracy of coding, particularly of the outcome, has the potential to affect model development. Research published in 2011 found that miscoding, misdiagnosis, and misclassification of diabetes was common in UK primary care (25). However, in more recent years, implementation of the UK Quality and Outcomes Framework

1  
2  
3 (QoF) has resulted in better coding of Type 2 diabetes, specifically within CPRD (26, 27). With improved  
4 interoperability, the launch of SNOMED is expected to further boost coding accuracy (28). Since this  
5 research utilised data initially recorded for managing the care of individual patients, there are also a  
6 number of potential sources of bias. To address this, the study cohort included only patients that are  
7 considered by CPRD of acceptable research standards. Further, clinical measures that were not  
8 biologically plausible and likely misreported were excluded. In most cases, another value that was  
9 biologically plausible was available within the same period for the patient.  
10  
11  
12  
13  
14  
15  
16  
17  
18  
19  
20

21 This study has several strengths. These models are for use in primary care. Therefore, we used a  
22 primary care database (CPRD) to develop the models. In recent years the HbA1c assay has been the  
23 preferred method to diagnose NDH and Type 2 diabetes compared with oral glucose tolerance or  
24 fasting plasma glucose tests (29). Therefore, these models were developed using HbA1c to quantify  
25 blood glucose. The large sample size allowed for a sufficient number of events per predictor  
26 parameter. We considered a range of predictors specifically selected due to clinical relevance to  
27 development of Type 2 diabetes. Continuous predictors were not categorised, so there was no loss of  
28 information. The decision to develop sex-specific models was based on the presence of some sex-  
29 specific risk factors, like history of gestational diabetes. Additionally, we identified new risk factors  
30 not included in the 2018 update of QDiabetes, which was developed within the general population  
31 (16). These risk factors include history of sleep apnoea, blood pressure, alcohol use, prescription of  
32 antihypertensives, and prescription of aspirin.  
33  
34  
35  
36  
37  
38  
39  
40  
41  
42  
43  
44  
45  
46  
47  
48  
49

50 This study also had several limitations. The primary limitation is the splitting of the cohort into  
51 development and validation datasets instead of using a fully external database to validate the model.  
52 However, given the size of the cohort and the large number of events, this likely had little effect on  
53 model development. Furthermore, to ensure case mix, non-random selection was used to split the  
54 cohort. The outcome for this study was defined using a single medcode or test result indicating Type  
55  
56  
57  
58  
59  
60



1  
2  
3 2 diabetes. In practice, this would typically be confirmed via a follow up test. Another limitation is that  
4 the models included predictor variables obtained at one point in time including a single HbA1c  
5 measure to determine NDH. However, the models could be adjusted to include time-varying  
6 predictors relatively easily. Methods such as land marking or joint models could be used to model  
7 changes in predictors over time. Some predictor variables were self-reported including smoking,  
8 alcohol use, and family history of diabetes. The proportion of non-current smokers is in line with a  
9 similar study while the proportion of patients with a family history of diabetes in this study was much  
10 lower than that reported in a similar study.<sup>(16)</sup> This may indicate that family history of diabetes is not  
11 established in clinical practice or established but not recorded within the CPRD. Prescriptions issued  
12 were used as a proxy for current medication. Patients may not have filled the prescription or adhered  
13 to the medication. Because this was an open cohort and the number of people diagnosed with NDH  
14 has increased in recent years, the mean follow-up time was short- 2.7 years for patients in the  
15 development dataset and 2.5 years for patients in the validation dataset. However, 14,896 patients in  
16 the development dataset and 5,678 patients in the validation dataset had five or more years of follow  
17 up. Therefore, based on existing research, we believe that there was sufficient follow-up time to  
18 determine risk for progression to Type 2 diabetes. HES and ONS linkage was only available for 59.0%  
19 of patients in the cohort. If linkage to ONS was not available and a date of death was provided in CPRD,  
20 then the CPRD date was used. While ONS is the gold standard for date of death, deaths are less well  
21 coded in CPRD. It is possible that deaths for some patients without linkage to ONS were never coded  
22 in CPRD, and the patients were not censored accordingly. However, this likely only affected a few  
23 patients. Finally, there may have been additional predictor variables that were not considered either  
24 because they are not collected as part of routine clinical care or because they are not among the  
25 known traditional risk factors for Type 2 diabetes.

26  
27  
28  
29  
30  
31  
32  
33  
34  
35  
36  
37  
38  
39  
40  
41  
42  
43  
44  
45  
46  
47  
48  
49  
50  
51  
52  
53  
54  
55  
56  
57 Similar to the QRISK cardiovascular disease risk algorithm, the models presented are designed to be  
58 integrated into primary care computer systems to automatically calculate risk (30). At the time of the  
59  
60

1  
2  
3 first HbA1c test indicating NDH, a risk score could be automatically generated using the HbA1c  
4  
5 measure along with clinical, prescription, and diagnoses data already contained in the individual's  
6  
7 electronic health record. Additionally, the algorithm for imputing missing data could also be  
8  
9 implemented automatically. Rather than referring all adults with NDH to the NHS DPP, healthcare  
10  
11 providers could prioritize referrals for people at high risk for progressing to Type 2 diabetes.  
12  
13  
14  
15

16 The NHS DPP is a limited resource and does not have current capacity to accommodate all adults with  
17  
18 NDH in England. People are referred to the NHS DPP through the NHS Health Check programme, aimed  
19  
20 at people aged 40-74, or people with NDH identified through opportunistic assessment or as part of  
21  
22 routine clinical care (9). Eligibility for the NHS DPP is typically determined through an HbA1c measure  
23  
24 or, less frequently, an Oral Glucose Tolerance Test (OGTT). However, this study has identified  
25  
26 additional factors to stratify further the risk of developing Type 2 diabetes within this high-risk group.  
27  
28 Targeting referrals may be a more cost-effective and efficient way to deliver the NHS DPP. The male  
29  
30 and female prognostic models we developed and validated could be used to identify and target those  
31  
32 most at risk of developing Type 2 diabetes for referral to the NHS DPP. Implementation of these  
33  
34 models would standardise the NHS DPP identification and referral process to be consistent across sites  
35  
36 and based on information already collected as part of primary care. The next step is to determine the  
37  
38 optimum risk threshold to accurately identify patients that will develop Type 2 diabetes.  
39  
40  
41  
42  
43  
44  
45  
46  
47  
48  
49  
50  
51  
52  
53  
54  
55  
56  
57  
58  
59  
60

## Footnotes

### CRedit Author Statement

Conceptualization: LJG, FZ, MJD, KK; funding acquisition: LJG (lead), MJD, FZ; methodology, writing – original draft: BC, LJG; data curation, formal analysis, validation, visualization: BC; software: BC, SB; writing – review & editing: FZ, MJD, KK, SB. All authors provided final approval of the version to publish. The corresponding author (BC) had full access to all the data in the study and had final responsibility for the decision to submit it for publication.

### Competing interests

BC, LJG, FZ, and SB: none

MJD has acted as consultant, advisory board member and speaker for Novo Nordisk, Sanofi-Aventis, Lilly, Merck Sharp & Dohme, Boehringer Ingelheim, AstraZeneca and Janssen, an advisory board member for Servier and as a speaker for Mitsubishi Tanabe Pharma Corporation and Takeda Pharmaceuticals International Inc. She has received grants in support of investigator and investigator initiated trials from Novo Nordisk, Sanofi-Aventis, Lilly, Boehringer Ingelheim and Janssen. She was a member of the NICE public health guideline for prevention of Type 2 diabetes (NICE PH 38).

KK has acted as a consultant and speaker for Novartis, Novo Nordisk, Sanofi-Aventis, Lilly and Merck Sharp & Dohme. He has received grants in support of investigator and investigator-initiated trials from Novartis, Novo Nordisk, Sanofi-Aventis, Lilly, Pfizer, Boehringer Ingelheim and Merck Sharp & Dohme. He is a member of the External Reference Group of the NHS DPP and was Chair of the NICE public health guideline for prevention of Type 2 diabetes (NICE PH 38).

### Acknowledgements

This study is based on data from the Clinical Practice Research Datalink GOLD database obtained under licence from the UK Medicines and Healthcare products Regulatory Agency. However, the interpretation and conclusions contained in this article are those of the authors alone.

The authors gratefully acknowledge Leicester Real-World Evidence Unit (LRWE) for facilitating the download of CPRD data. LRWE is funded by University of Leicester, National Institute for Health Research (NIHR) Applied Research Collaboration East Midlands (ARC EM) and NIHR Leicester Biomedical Research Centre. The interpretation and conclusions contained in this report/article do not necessarily reflect those of the LRWE.

### Funding

This research was supported by a grant from National Institute for Health Research (NIHR) Collaboration for Leadership in Applied Health Research and Care (CLAHRC) East Midlands. The funding body had no role in the study design, data collection, analysis, or interpretation; in the writing of the manuscript; or in the decision to submit the manuscript.

1  
2  
3  
4 This research was also funded in part by the NIHR Leicester Biomedical Research Centre and NIHR  
5 Applied Research Collaboration. The views expressed are those of the author(s) and not necessarily  
6 those of the NHS, the NIHR or the Department of Health and Social Care.  
7  
8  
9

### 10 **Ethical approval**

11  
12 This research was approved by the Independent Scientific Advisory Committee (ISAC) for Medicines  
13 and Healthcare products Regulatory Agency Database Research (protocol 18\_238).  
14  
15  
16

### 17 **Data sharing**

18  
19 Patient-level electronic health records obtained from CPRD cannot be shared. However, the authors  
20 will share programming code and aggregate statistics if requested. A list of medcodes used to define  
21 Type 2 diabetes, pre-existing Type 1 diabetes, and medical and family history as well as product codes  
22 used to identify current medication is available at <https://github.com/bc188/Prognostic-model-codes>.  
23  
24  
25  
26  
27  
28  
29  
30  
31  
32  
33  
34  
35  
36  
37  
38  
39  
40  
41  
42  
43  
44  
45  
46  
47  
48  
49  
50  
51  
52  
53  
54  
55  
56  
57  
58  
59  
60

## REFERENCES

1. Barron E, Valabhji J, Young B. Prevalence, characteristics, distribution and identification of non-diabetic hyperglycaemia in England, 2016. Available from <https://www.gov.uk/government/news/five-million-people-at-high-risk-of-type-2-diabetes>. Accessed 20 Sept 2019
2. Gillies CL, Abrams KR, Lambert PC, Cooper NJ, Sutton AJ, Hsu RT, Khunti K. Pharmacological and lifestyle interventions to prevent or delay type 2 diabetes in people with impaired glucose tolerance: systematic review and meta-analysis. *BMJ* 2007;334:299
3. Kramer MK, Miller RG, Siminerio LM. Evaluation of a community Diabetes Prevention Program delivered by diabetes educators in the United States: One-year follow up. *Diabetes Res Clin Pr* 2014;106(3):E49-E52.
4. Knowler WC B-CE, Fowler SE, et al. Reduction in the incidence of type 2 diabetes with lifestyle intervention or metformin. *N Engl J Med* 2002; 346:393-403
5. Tuomilehto J, Lindström J, Eriksson JG, Valle TT, Hämäläinen H, Ilanne-Parikka P, Keinänen-Kiukaanniemi S, Laakso M, Louheranta A, Rastas M, Salminen V, Uusitupa M. Prevention of Type 2 Diabetes Mellitus by Changes in Lifestyle among Subjects with Impaired Glucose Tolerance. *N Engl J Med* 2001; 344:1343-1350
6. Pan XR, Li GW, Hu YH, Wang JX, Yang WY, An ZX, Hu ZX, Lin J, Xiao JZ, Cao HB, Liu PA, Jiang XG, Jiang YY, Wang JP, Zheng H, Zhang H, Bennett PH, Howard BV. Effects of diet and exercise in preventing NIDDM in people with impaired glucose tolerance: the Da Qing IGT and Diabetes Study. *Diabetes Care* 1997; 20:537-544
7. Troughton J, Chatterjee S, Hill SE, Daly H, Martin Stacey L, Stone MA, Patel N, Khunti K, Yates T, Gray LJ, Davies MJ. Development of a lifestyle intervention using the MRC framework for diabetes prevention in people with impaired glucose regulation. *J Public Health (Oxf)* 38: 493-501
8. England NHS. Roll out of the Programme, 2016. Available from <https://www.england.nhs.uk/diabetes/diabetes-prevention/roll-out-of-the-programme>. Accessed 20 Sept 2019
9. England NHS. NHSDPP overview and FAQ, 2016. Available from <https://www.england.nhs.uk/wp-content/uploads/2016/08/dpp-faq.pdf>. Accessed 20 Sept 2019
10. Collins GS, Mallett S, Omar O, Yu L. Developing risk prediction models for type 2 diabetes: a systematic review of methodology and reporting. *BMC Med* 2011;9:103
11. Noble D, Mathur R, Dent T, Meads C, Greenhalgh T. Risk models and scores for type 2 diabetes: systematic review. *BMJ* 2011;343(d7163).
12. Barber SR, Davies MJ, Khunti K, Gray LJ. Risk assessment tools for detecting those with pre-diabetes: a systematic review. *Diabetes Res Clin Pract* 2014;105:1-13
13. Bodicoat DH, Khunti K, Srinivasan BT, Mostafa S, Gray LJ, Davies MJ, Webb DR. Incident Type 2 diabetes and the effect of early regression to normoglycaemia in a population with impaired glucose regulation. *Diabet Med* 2017;34:396-404
14. Herrett E, Gallagher AM, Bhaskaran K, Forbes H, Mathur R, van Staa T, Smeeth L. Data resource profile: clinical practice research datalink (CPRD). *Int J Epidemiol* 2015;44:827-36
15. Riley RD, Snell KI, Ensor J, Burke DL, Harrell Jr FE, Moons KG, Collins GS. Minimum sample size for developing a multivariable prediction model: PART II-binary and time-to-event outcomes. *Stat Med* 2019;38:1276-96
16. Hippisley-Cox J, Coupland C. Development and validation of QDiabetes-2018 risk prediction algorithm to estimate future risk of type 2 diabetes: cohort study. *BMJ* 2017;359:j5019
17. Gray LJ, Taub N, Khunti K, Gardiner E, Hiles S, Webb DR, Srinivasan BT, Davies MJ. The Leicester Risk Assessment score for detecting undiagnosed Type 2 diabetes and impaired glucose regulation for use in a multiethnic UK setting. *Diabet Med* 2010;27:887-95
18. Van der Heijden GJ, Donders ART, Stijnen T, Moons KG. Imputation of missing values is superior to complete case analysis and the missing-indicator method in multivariable diagnostic research: a clinical example. *J Clin Epidemiol* 2006;59:1102-9
19. Royston P, Lambert PC. Flexible parametric survival analysis using Stata: beyond the Cox model. *Stat Med* 2014;33:5280-97
20. Dunkler D, Plischke M, Leffondré K, Heinze G. Augmented backward elimination: a pragmatic and purposeful way to develop statistical models. *PLoS One* 2014;9:e113677
21. Harrell FE, Califf RM, Pryor DB, Lee KL, Rosati RA. Evaluating the yield of medical tests. *JAMA* 1982;247:2543-6

- 1
  - 2
  - 3
  - 4
  - 5
  - 6
  - 7
  - 8
  - 9
  - 10
  - 11
  - 12
  - 13
  - 14
  - 15
  - 16
  - 17
  - 18
  - 19
  - 20
  - 21
  - 22
  - 23
  - 24
  - 25
  - 26
  - 27
  - 28
  - 29
  - 30
  - 31
  - 32
  - 33
  - 34
  - 35
  - 36
  - 37
  - 38
  - 39
  - 40
  - 41
  - 42
  - 43
  - 44
  - 45
  - 46
  - 47
  - 48
  - 49
  - 50
  - 51
  - 52
  - 53
  - 54
  - 55
  - 56
  - 57
  - 58
  - 59
  - 60
22. Harrell FE, Lee KL, Mark DB. Multivariable prognostic models: Issues in developing models, evaluating assumptions and adequacy, and measuring and reducing errors. *Stat Med* 1996;15:361-87
23. Snee R. Validation of Regression Models: Methods and Examples. *Technometrics* 1977;19:419-28
24. Dunkley AJ, Stone MA, Patel N, Davies MJ, Khunti K. Waist circumference measurement: knowledge, attitudes and barriers in patients and practitioners in a multi-ethnic population. *Fam Pract* 2009;26:365-71
25. De Lusignan S, Sadek N, Mulnier H, Tahir A, Russell-Jones D, Khunti K. Miscoding, misclassification and misdiagnosis of diabetes in primary care. *Diabet Med* 2012;29:181-9
26. Calvert M, Shankar A, McManus RJ, Lester H, Freemantle N. Effect of the quality and outcomes framework on diabetes care in the United Kingdom: retrospective cohort study. *BMJ* 2009;338:b1870
27. Tate AR, Dungey S, Glew S, Beloff N, Williams R, Williams T. Quality of recording of diabetes in the UK: how does the GP's method of coding clinical data affect incidence estimates? Cross-sectional study using the CPRD database. *BMJ open* 2017;7:e012905
28. Haarbrandt B, Schreiweis B, Rey S, Sax U, Scheithauer S, Rienhoff O, Knaup-Gregori P, Bavendiek U, Dieterich C, Brors B, Kraus I, Thoms CM, Jäger D, Ellenrieder V, Bergh B, Yahyapour R, Eils R, Consortium H, Marschollek M. HiGHmed - An Open Platform Approach to Enhance Care and Research across Institutional Boundaries. *Methods Inf Med* 2018;57:e66-e81
29. International Expert Committee. International Expert Committee report on the role of the A1C assay in the diagnosis of diabetes. *Diabetes Care* 2009;32:1327-34
30. Hippisley-Cox J, Coupland C, Brindle P. Development and validation of QRISK3 risk prediction algorithms to estimate future risk of cardiovascular disease: prospective cohort study. *BMJ*. 2017;357:j2099

**Supplementary Table S1.** Number of practices by region in total and included in the development and validation datasets.

| Practice region        | Total      | Dataset     |            |
|------------------------|------------|-------------|------------|
|                        |            | Development | Validation |
| North East             | 11         | 8           | 3          |
| North West             | 85         | 60          | 26         |
| Yorkshire & The Humber | 28         | 20          | 8          |
| East Midlands          | 25         | 18          | 8          |
| West Midlands          | 61         | 43          | 18         |
| East of England        | 54         | 38          | 16         |
| South West             | 61         | 43          | 18         |
| South Central          | 56         | 39          | 17         |
| London                 | 95         | 67          | 29         |
| South East Coast       | 68         | 48          | 20         |
| Northern Ireland       | 25         | 18          | 8          |
| Scotland               | 94         | 66          | 28         |
| Wales                  | 77         | 54          | 23         |
| <b>Total</b>           | <b>740</b> | <b>518</b>  | <b>222</b> |

**Supplementary Table S2.** Percent of patients missing potential predictor variables.

| Predictor variable               | Missing |      |
|----------------------------------|---------|------|
|                                  | n       | %    |
| Waist circumference              | 153,592 | 99.3 |
| Liver function test              | 153,493 | 99.2 |
| Pulse rate                       | 133,890 | 86.5 |
| BMI                              | 113,840 | 73.6 |
| Index of Multiple Deprivation    | 63,524  | 41.1 |
| Systolic blood pressure          | 48,390  | 31.3 |
| Diastolic blood pressure         | 48,390  | 31.3 |
| Ethnicity                        | 41,121  | 26.6 |
| Serum cholesterol                | 38,910  | 25.2 |
| HbA1c                            | 0       | 0    |
| Age                              | 0       | 0    |
| Sex                              | 0       | 0    |
| Current alcohol use              | 0       | 0    |
| Current smoker                   | 0       | 0    |
| Antihypertensives                | 0       | 0    |
| Atypical antipsychotics          | 0       | 0    |
| Aspirin                          | 0       | 0    |
| Corticosteroids                  | 0       | 0    |
| Statins                          | 0       | 0    |
| Bipolar disease or schizophrenia | 0       | 0    |
| Cardiovascular disease           | 0       | 0    |
| Depression                       | 0       | 0    |
| Learning disability              | 0       | 0    |
| Diabetes in family               | 0       | 0    |
| Polycystic ovarian syndrome      | 0       | 0    |
| Gestational diabetes             | 0       | 0    |
| Renal/kidney disease             | 0       | 0    |
| Sleep apnoea                     | 0       | 0    |



Supplementary Table S3. Incidence of Type 2 diabetes per 1,000 person years with 95% confidence intervals.

|                         |           | Dataset   |        |                  |             |       |                  |            |       |                  |
|-------------------------|-----------|-----------|--------|------------------|-------------|-------|------------------|------------|-------|------------------|
|                         |           | Total     |        |                  | Development |       |                  | Validation |       |                  |
|                         |           | Py        | n      | Rate (95% CI)    | Py          | n     | Rate (95% CI)    | Py         | n     | Rate (95% CI)    |
| Total                   |           | 408,350.5 | 13,115 | 32.1 (31.6-32.7) | 293,237.8   | 9,332 | 31.8 (31.2-32.5) | 115,112.6  | 3,783 | 32.9 (31.8-33.9) |
| Age group               | <30       | 4,285.1   | 79     | 18.4 (14.8-23.0) | 3,017.0     | 56    | 18.6 (14.3-24.1) | 1,268.1    | 23    | 18.1 (12.1-27.3) |
|                         | 30-39     | 15,214.7  | 307    | 20.2 (18.0-22.6) | 11,050.8    | 231   | 20.9 (18.4-23.8) | 4,164.0    | 76    | 18.3 (14.6-22.9) |
|                         | 40-49     | 43,354.3  | 1,157  | 26.7 (25.2-28.3) | 31,539.3    | 836   | 26.5 (24.8-28.4) | 11,815.0   | 321   | 27.2 (24.4-30.3) |
|                         | 50-59     | 81,437.4  | 2,399  | 29.5 (28.3-30.7) | 58,691.3    | 1,730 | 29.5 (28.1-30.9) | 22,746.1   | 669   | 29.4 (27.3-31.7) |
|                         | 60-69     | 109,599.6 | 3,808  | 34.7 (33.7-35.9) | 79,177.3    | 2,709 | 34.2 (32.9-35.5) | 30,422.4   | 1,099 | 36.1 (34.1-38.3) |
|                         | 70-79     | 96,100.4  | 3,553  | 37.0 (35.8-38.2) | 68,493.3    | 2,527 | 36.9 (35.5-38.4) | 27,607.1   | 1,026 | 37.2 (35.0-39.5) |
|                         | 80-89     | 50,818.9  | 1,629  | 32.1 (30.5-33.7) | 36,072.2    | 1,114 | 30.9 (29.1-32.8) | 14,746.7   | 515   | 34.9 (32.0-38.1) |
|                         | 90+       | 7,540.0   | 183    | 24.3 (21.0-28.1) | 5,196.7     | 129   | 24.8 (20.9-29.5) | 2,343.2    | 54    | 23.0 (17.6-30.1) |
| Sex                     | Male      | 186,953.5 | 6,612  | 35.4 (34.5-36.2) | 134,390.2   | 4,719 | 35.1 (34.1-36.1) | 52,563.3   | 1,893 | 36.0 (34.4-37.7) |
|                         | Female    | 221,397.0 | 6,503  | 29.4 (28.7-30.1) | 158,847.6   | 4,613 | 29.0 (28.2-29.9) | 62,549.3   | 1,890 | 30.2 (28.9-31.6) |
| Ethnicity               | Non-white | 38,606.0  | 1,154  | 29.9 (28.2-31.7) | 29,281.3    | 863   | 29.5 (27.6-31.5) | 9,324.7    | 291   | 31.2 (27.8-35.0) |
|                         | White     | 257,231.3 | 8,446  | 32.8 (32.1-33.5) | 181,622.3   | 5,878 | 32.4 (31.5-33.2) | 75,609.0   | 2,568 | 34.0 (32.7-35.3) |
| Current alcohol user    | No        | 321,672.8 | 10,049 | 31.2 (30.6-31.9) | 231,489.6   | 7,223 | 31.2 (30.5-31.9) | 90,183.2   | 2,826 | 31.3 (30.2-32.5) |
|                         | Yes       | 86,677.6  | 3,066  | 35.4 (34.1-36.6) | 61,748.2    | 2,109 | 34.2 (32.7-35.6) | 24,929.4   | 957   | 38.4 (36.0-40.9) |
| Current smoker          | No        | 351,866.5 | 11,355 | 32.3 (31.7-32.9) | 252,907.8   | 8,103 | 32.0 (31.3-32.7) | 98,958.7   | 3,252 | 32.9 (31.8-34.0) |
|                         | Yes       | 56,483.9  | 1,760  | 31.2 (29.7-32.6) | 40,330.0    | 1,229 | 30.5 (28.8-32.2) | 16,154.0   | 531   | 32.9 (30.2-35.8) |
| Antihypertensives       | No        | 402,244.5 | 12,840 | 31.9 (31.4-32.5) | 288,800.1   | 9,137 | 31.6 (31.0-32.3) | 113,444.4  | 3,703 | 32.6 (31.6-33.7) |
|                         | Yes       | 6,105.9   | 275    | 45.0 (40.0-50.7) | 4,437.7     | 195   | 43.9 (38.2-50.6) | 1,668.3    | 80    | 48.0 (38.5-59.7) |
| Atypical antipsychotics | No        | 397,003.1 | 12,760 | 32.1 (31.6-32.7) | 284,987.3   | 9,084 | 31.9 (31.2-32.5) | 112,015.8  | 3,676 | 32.8 (31.8-33.9) |
|                         | Yes       | 11,347.4  | 355    | 31.3 (28.2-34.7) | 8,250.5     | 248   | 30.1 (26.5-34.0) | 3,096.9    | 107   | 34.6 (28.6-41.8) |
| Aspirin                 | No        | 282,265.5 | 7,971  | 28.2 (27.6-28.9) | 202,397.8   | 5,686 | 28.1 (27.4-28.8) | 79,867.7   | 2,285 | 28.6 (27.5-29.8) |
|                         | Yes       | 126,085.0 | 5,144  | 40.8 (39.7-41.9) | 90,840.0    | 3,646 | 40.1 (38.9-41.5) | 35,245.0   | 1,498 | 42.5 (40.4-44.7) |
| Corticosteroids         | No        | 132,237.8 | 3,781  | 28.6 (27.7-29.5) | 94,557.1    | 2,721 | 28.8 (27.7-29.9) | 37,680.7   | 1,060 | 28.1 (26.5-29.9) |
|                         | Yes       | 276,112.7 | 9,334  | 33.8 (33.1-34.5) | 198,680.8   | 6,611 | 33.3 (32.5-34.1) | 77,431.9   | 2,723 | 35.2 (33.9-36.5) |
| Statins                 | No        | 197,618.7 | 4,184  | 21.2 (20.5-21.8) | 141,932.3   | 2,977 | 21.0 (20.2-21.7) | 55,686.3   | 1,207 | 21.7 (20.5-22.9) |
|                         | Yes       | 210,731.8 | 8,931  | 42.4 (41.5-43.3) | 151,305.5   | 6,355 | 42.0 (41.0-43.0) | 59,426.3   | 2,576 | 43.3 (41.7-45.1) |
| Schizophrenia/bipolar   | No        | 402,889.4 | 12,937 | 32.1 (31.6-32.7) | 289,246.4   | 9,212 | 31.8 (31.2-32.5) | 113,642.9  | 3,725 | 32.8 (31.7-33.8) |
|                         | Yes       | 5,461.1   | 178    | 32.6 (28.1-37.8) | 3,991.4     | 120   | 30.1 (25.1-36.0) | 1,469.7    | 58    | 39.5 (30.5-51.0) |
| Cardiovascular disease  | No        | 361,574.5 | 11,297 | 31.2 (30.7-31.8) | 260,237.0   | 8,074 | 31.0 (30.4-31.7) | 101,337.5  | 3,223 | 31.8 (30.7-32.9) |
|                         | Yes       | 46,776.0  | 1,818  | 38.9 (37.1-40.7) | 33,000.8    | 1,258 | 38.1 (36.1-40.3) | 13,775.1   | 560   | 40.7 (37.4-44.2) |
| Depression              | No        | 303,786.2 | 9,875  | 32.5 (31.9-33.2) | 219,040.2   | 7,043 | 32.2 (31.4-32.9) | 84,746.0   | 2,832 | 33.4 (32.2-34.7) |

|                       |         |           |        |                    |           |       |                    |           |       |                   |
|-----------------------|---------|-----------|--------|--------------------|-----------|-------|--------------------|-----------|-------|-------------------|
|                       | Yes     | 104,564.3 | 3,240  | 31.0 (29.9-32.1)   | 74,197.7  | 2,289 | 30.9 (29.6-32.1)   | 30,366.6  | 951   | 31.3 (29.4-33.4)  |
| Learning disability   | No      | 406,734.9 | 13,060 | 32.1 (31.6-32.7)   | 292,204.8 | 9,301 | 31.8 (31.2-32.5)   | 114,530.1 | 3,759 | 32.8 (31.8-33.9)  |
|                       | Yes     | 1,615.6   | 55     | 34.0 (26.1-44.3)   | 1,033.0   | 31    | 30.0 (21.1-42.7)   | 582.5     | 24    | 41.2 (27.6-61.5)  |
| Diabetes in family    | No      | 407,867.0 | 13,091 | 32.1 (31.6-32.7)   | 292,821.8 | 9,311 | 31.8 (31.2-32.4)   | 115,045.1 | 3,780 | 32.9 (31.8-33.9)  |
|                       | Yes     | 483.5     | 24     | 49.6 (33.3-74.1)   | 416.0     | 21    | 50.5 (32.9-77.4)   | 67.5      | <5    | 44.4 (14.3-137.8) |
| Renal/kidney disease  | No      | 368,309.2 | 11,766 | 31.9 (31.4-32.5)   | 265,292.2 | 8,403 | 31.7 (31.0-32.4)   | 103,016.9 | 3,363 | 32.6 (31.6-33.8)  |
|                       | Yes     | 40,041.3  | 1,349  | 33.7 (31.9-35.5)   | 27,945.6  | 929   | 33.2 (31.2-35.5)   | 12,095.7  | 420   | 34.7 (31.6-38.2)  |
| Sleep apnoea          | No      | 403,300.5 | 12,896 | 32.0 (31.4-32.5)   | 289,628.0 | 9,178 | 31.7 (31.0-32.3)   | 113,672.4 | 3,718 | 32.7 (31.7-33.8)  |
|                       | Yes     | 5,050.0   | 219    | 43.4 (38.0-49.5)   | 3,609.8   | 154   | 42.7 (36.4-50.0)   | 1,440.2   | 65    | 45.1 (35.4-57.6)  |
| PCOS*                 | No      | 219,461.5 | 6,441  | 29.3 (28.6-30.1)   | 157,488.6 | 4,571 | 29.0 (28.2-29.9)   | 61,972.9  | 1,870 | 30.2 (28.8-31.6)  |
|                       | Yes     | 1,935.5   | 62     | 32.0 (25.0-41.1)   | 1,359.0   | 42    | 30.9 (22.8-41.8)   | 576.5     | 20    | 34.7 (22.4-53.8)  |
| Gestational diabetes* | No      | 219,205.1 | 6,423  | 29.3 (28.6-30.0)   | 157,163.0 | 4,550 | 29.0 (28.1-29.8)   | 62,042.1  | 1,873 | 30.2 (28.9-31.6)  |
|                       | Yes     | 2,191.9   | 80     | 36.5 (29.3-45.4)   | 1,684.7   | 63    | 37.4 (29.2-47.9)   | 507.2     | 17    | 33.5 (20.8-53.9)  |
| HbA1c (mmol/mol)      | 42      | 143,564.4 | 2,341  | 16.3 (15.7-17.0)   | 102,303.4 | 1,650 | 16.1 (15.4-16.9)   | 41,261.0  | 691   | 16.7 (15.5-18.0)  |
|                       | 43      | 103,706.7 | 2,496  | 24.1 (23.1-25.0)   | 74,289.4  | 1,762 | 23.7 (22.6-24.9)   | 29,417.3  | 734   | 25.0 (23.2-26.8)  |
|                       | 44      | 72,839.5  | 2,563  | 35.2 (33.9-36.6)   | 52,495.5  | 1,801 | 34.3 (32.8-35.9)   | 20,344.0  | 762   | 37.5 (34.9-40.2)  |
|                       | 45      | 48,523.8  | 2,407  | 49.6 (47.7-51.6)   | 35,497.9  | 1,724 | 48.6 (46.3-50.9)   | 13,025.9  | 683   | 52.4 (48.6-56.5)  |
|                       | 46      | 31,687.9  | 2,473  | 78.0 (75.0-81.2)   | 22,985.0  | 1,794 | 78.1 (74.5-81.7)   | 8,702.9   | 679   | 78.0 (72.4-84.1)  |
|                       | 47      | 8,028.2   | 835    | 104.0 (97.2-111.3) | 5,666.6   | 601   | 106.1 (97.9-114.9) | 2,361.6   | 234   | 99.1 (87.2-112.6) |
| Cholesterol (mmol/L)  | <5.0    | 130,946.3 | 4,568  | 34.9 (33.9-35.9)   | 93,611.8  | 3,273 | 35.0 (33.8-36.2)   | 37,334.5  | 1,295 | 34.7 (32.8-36.6)  |
|                       | 5.0-6.9 | 152,342.9 | 4,978  | 32.7 (31.8-33.6)   | 109,313.4 | 3,548 | 32.5 (31.4-33.5)   | 43,029.5  | 1,430 | 33.2 (31.6-35.0)  |
|                       | ≥7.0    | 24,848.2  | 817    | 32.9 (30.7-35.2)   | 17,982.7  | 573   | 31.9 (29.4-34.6)   | 6,865.5   | 244   | 35.5 (31.3-40.3)  |
| Systolic BP (mmHg)    | <140    | 147,766.9 | 4,476  | 30.3 (29.4-31.2)   | 105,813.8 | 3,195 | 30.2 (29.2-31.3)   | 41,953.1  | 1,281 | 30.5 (28.9-32.3)  |
|                       | ≥140    | 135,710.1 | 5,206  | 38.4 (37.3-39.4)   | 97,560.5  | 3,685 | 37.8 (36.6-39.0)   | 38,149.6  | 1,521 | 39.9 (37.9-41.9)  |
| Diastolic BP (mmHg)   | <90     | 228,884.2 | 7,540  | 32.9 (32.2-33.7)   | 164,236.7 | 5,367 | 32.7 (31.8-33.6)   | 64,647.6  | 2,173 | 33.6 (32.2-35.1)  |
|                       | ≥90     | 54,592.8  | 2,142  | 39.2 (37.6-40.9)   | 39,137.6  | 1,513 | 38.7 (36.8-40.7)   | 15,455.2  | 629   | 40.7 (37.6-44.0)  |

BP=blood pressure. PCOS=Polycystic ovarian syndrome.

Table includes observed values only. Imputed values for ethnicity, serum cholesterol, and systolic and diastolic blood pressure are not included.

Index of multiple deprivation, BMI, pulse, liver function test, and waist circumference are not included in the table since these measures are not available for >33.3% of the cohort.

Age was collapsed into 10-year groups. HbA1c was collapsed into one mmol/mol increments. Cholesterol was collapsed into three clinically relevant groups (<5.0, 5.0-6.9, and ≥7.0mmol/L). Systolic blood pressure was collapsed into two clinically relevant groups based on NICE guidelines for hypertension (<140 and ≥140 mmHg) as was diastolic blood pressure (<90 and ≥90 mmHg) (27).

1  
2  
3  
4  
5  
6  
7  
8  
9  
10  
11  
12  
13  
14  
15  
16  
17  
18  
19  
20  
21  
22  
23  
24  
25  
26  
27  
28  
29  
30  
31  
32  
33  
34  
35  
36  
37  
38  
39  
40  
41  
42  
43  
44  
45  
46

\*The incidence was calculated among females only.

\*Note, n<5 cannot be published.

For peer review only

Supplementary Figure S1. Participant flow diagram.

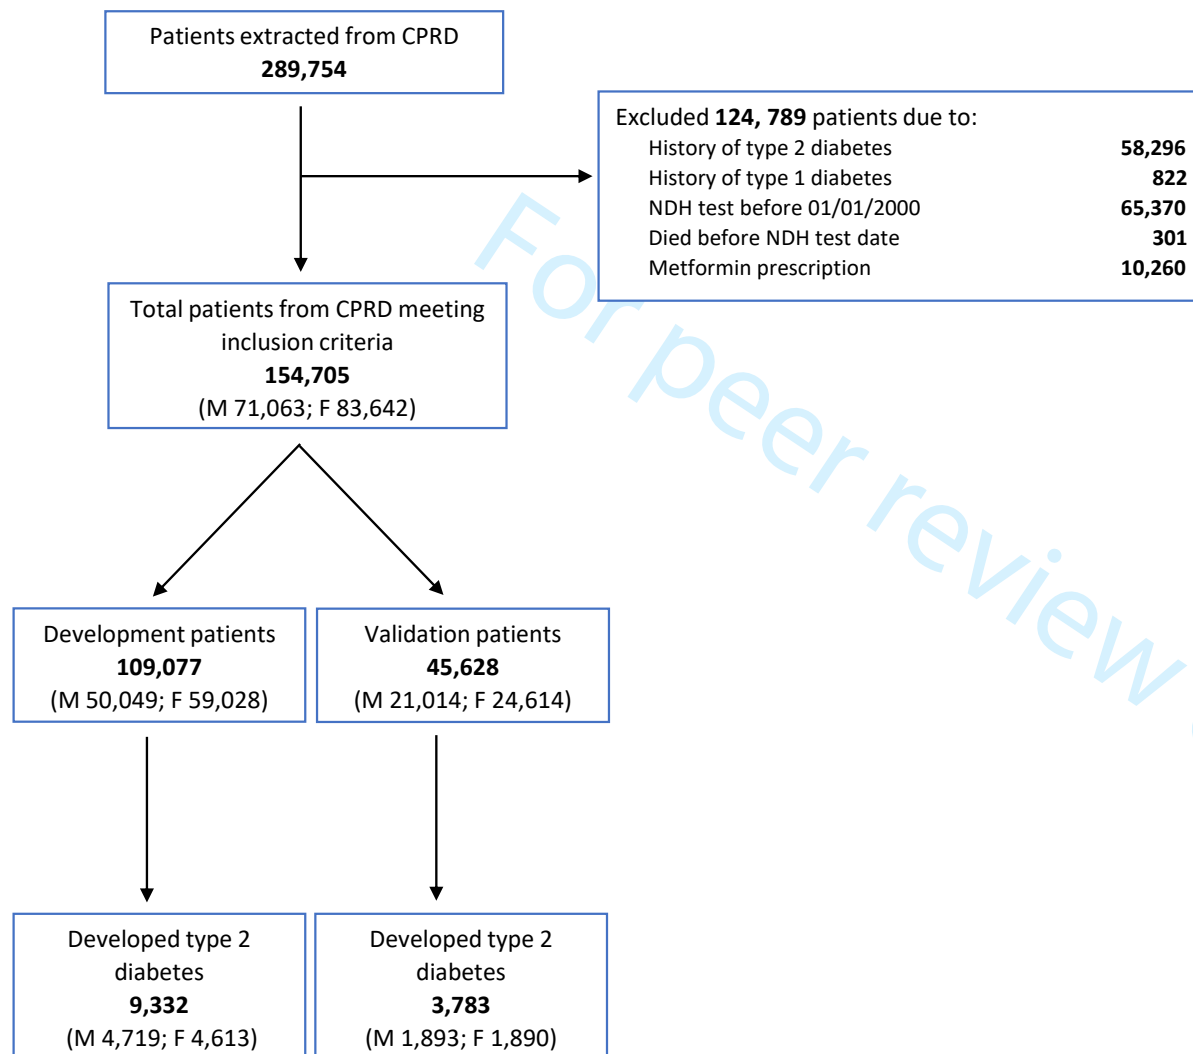

Supplementary Figure S2. Distribution of continuous variables for the development and validation datasets.

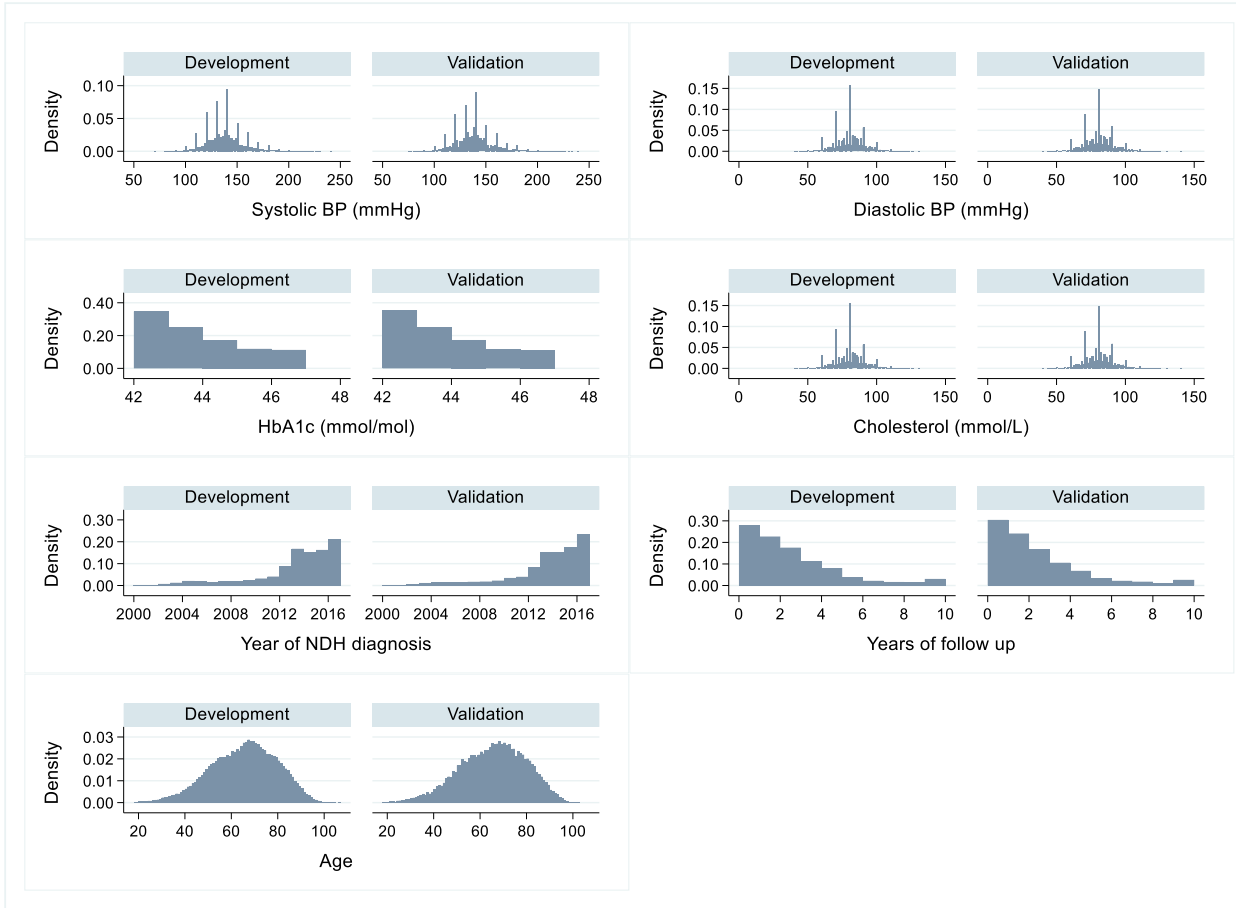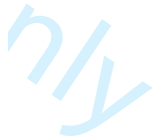

**Supplementary Figure S3.** Calibration plots by 10-year Type 2 diabetes risk deciles for the male and female models in one of the imputed validation datasets.

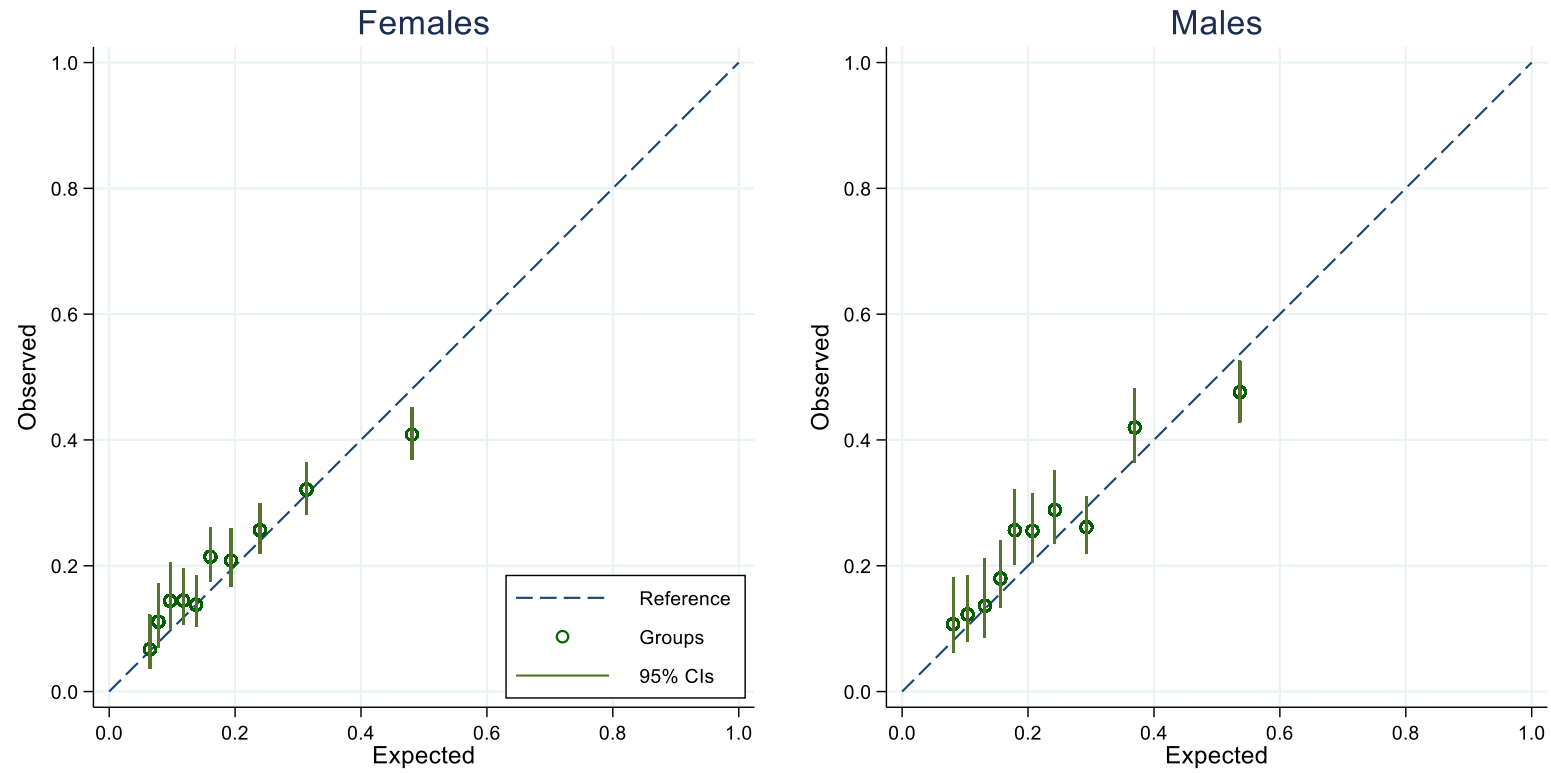

**Supplementary Figure S4.** Kaplan-Meier Type 2 diabetes-free probability and 95% confidence intervals for the male and female models in one of the imputed validation datasets.

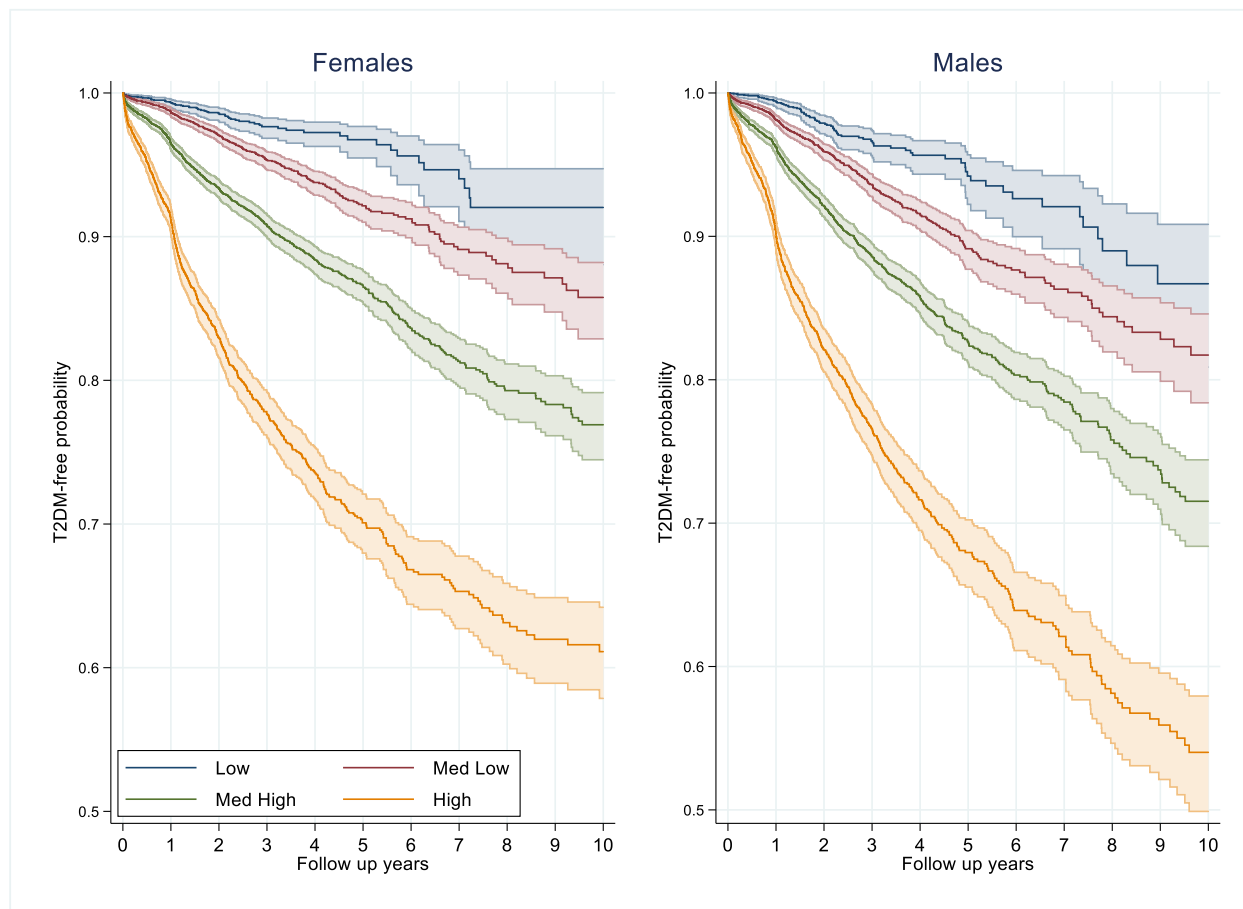

nly

**The RECORD statement – checklist of items, extended from the STROBE statement, that should be reported in observational studies using routinely collected health data.**

|                           | Item No. | STROBE items                                                                                                                                                                               | Location in manuscript where items are reported | RECORD items                                                                                                                                                                                                                                                                                                                                                                                                                                | Location in manuscript where items are reported |
|---------------------------|----------|--------------------------------------------------------------------------------------------------------------------------------------------------------------------------------------------|-------------------------------------------------|---------------------------------------------------------------------------------------------------------------------------------------------------------------------------------------------------------------------------------------------------------------------------------------------------------------------------------------------------------------------------------------------------------------------------------------------|-------------------------------------------------|
| <b>Title and abstract</b> |          |                                                                                                                                                                                            |                                                 |                                                                                                                                                                                                                                                                                                                                                                                                                                             |                                                 |
|                           | 1        | (a) Indicate the study's design with a commonly used term in the title or the abstract (b) Provide in the abstract an informative and balanced summary of what was done and what was found |                                                 | RECORD 1.1: The type of data used should be specified in the title or abstract. When possible, the name of the databases used should be included.<br><br>RECORD 1.2: If applicable, the geographic region and timeframe within which the study took place should be reported in the title or abstract.<br><br>RECORD 1.3: If linkage between databases was conducted for the study, this should be clearly stated in the title or abstract. | Pg 1-2<br><br>Pg 2<br><br>NA                    |
| <b>Introduction</b>       |          |                                                                                                                                                                                            |                                                 |                                                                                                                                                                                                                                                                                                                                                                                                                                             |                                                 |
| Background rationale      | 2        | Explain the scientific background and rationale for the investigation being reported                                                                                                       |                                                 |                                                                                                                                                                                                                                                                                                                                                                                                                                             | Pg 4-5                                          |
| Objectives                | 3        | State specific objectives, including any prespecified hypotheses                                                                                                                           |                                                 |                                                                                                                                                                                                                                                                                                                                                                                                                                             | Pg 5                                            |
| <b>Methods</b>            |          |                                                                                                                                                                                            |                                                 |                                                                                                                                                                                                                                                                                                                                                                                                                                             |                                                 |
| Study Design              | 4        | Present key elements of study design early in the paper                                                                                                                                    |                                                 |                                                                                                                                                                                                                                                                                                                                                                                                                                             | Pg 6                                            |
| Setting                   | 5        | Describe the setting, locations, and relevant dates, including periods of recruitment, exposure, follow-up, and data collection                                                            |                                                 |                                                                                                                                                                                                                                                                                                                                                                                                                                             | Pg 6-7                                          |



|                                                                                                                                                                                                            |          |                                                                                                                                                                                                                                                                                                                                                                                                                                                                                                                                                                                                                                                                                                                        |  |                                                                                                                                                                                                                                                                                                                                                                                                                                                                                                                                                                                                                                                                                                      |                                                                           |
|------------------------------------------------------------------------------------------------------------------------------------------------------------------------------------------------------------|----------|------------------------------------------------------------------------------------------------------------------------------------------------------------------------------------------------------------------------------------------------------------------------------------------------------------------------------------------------------------------------------------------------------------------------------------------------------------------------------------------------------------------------------------------------------------------------------------------------------------------------------------------------------------------------------------------------------------------------|--|------------------------------------------------------------------------------------------------------------------------------------------------------------------------------------------------------------------------------------------------------------------------------------------------------------------------------------------------------------------------------------------------------------------------------------------------------------------------------------------------------------------------------------------------------------------------------------------------------------------------------------------------------------------------------------------------------|---------------------------------------------------------------------------|
| <p>1<br/>2<br/>3<br/>4<br/>5<br/>6<br/>7<br/>8<br/>9<br/>10<br/>11<br/>12<br/>13<br/>14<br/>15<br/>16<br/>17<br/>18<br/>19<br/>20<br/>21<br/>22<br/>23<br/>24<br/>25<br/>26<br/>27</p> <p>Participants</p> | <p>6</p> | <p>(a) <i>Cohort study</i> - Give the eligibility criteria, and the sources and methods of selection of participants. Describe methods of follow-up<br/> <i>Case-control study</i> - Give the eligibility criteria, and the sources and methods of case ascertainment and control selection. Give the rationale for the choice of cases and controls<br/> <i>Cross-sectional study</i> - Give the eligibility criteria, and the sources and methods of selection of participants</p> <p>(b) <i>Cohort study</i> - For matched studies, give matching criteria and number of exposed and unexposed<br/> <i>Case-control study</i> - For matched studies, give matching criteria and the number of controls per case</p> |  | <p>RECORD 6.1: The methods of study population selection (such as codes or algorithms used to identify subjects) should be listed in detail. If this is not possible, an explanation should be provided.</p> <p>RECORD 6.2: Any validation studies of the codes or algorithms used to select the population should be referenced. If validation was conducted for this study and not published elsewhere, detailed methods and results should be provided.</p> <p>RECORD 6.3: If the study involved linkage of databases, consider use of a flow diagram or other graphical display to demonstrate the data linkage process, including the number of individuals with linked data at each stage.</p> | <p>Pg 6-8, link to code lists provided on Pg 22</p> <p>NA</p> <p>Pg 6</p> |
| <p>28<br/>29<br/>30<br/>31<br/>32<br/>33<br/>34</p> <p>Variables</p>                                                                                                                                       | <p>7</p> | <p>Clearly define all outcomes, exposures, predictors, potential confounders, and effect modifiers. Give diagnostic criteria, if applicable.</p>                                                                                                                                                                                                                                                                                                                                                                                                                                                                                                                                                                       |  | <p>RECORD 7.1: A complete list of codes and algorithms used to classify exposures, outcomes, confounders, and effect modifiers should be provided. If these cannot be reported, an explanation should be provided.</p>                                                                                                                                                                                                                                                                                                                                                                                                                                                                               | <p>link to code lists provided on Pg 22</p>                               |
| <p>35<br/>36<br/>37<br/>38<br/>39<br/>40<br/>41<br/>42</p> <p>Data sources/<br/>measurement</p>                                                                                                            | <p>8</p> | <p>For each variable of interest, give sources of data and details of methods of assessment (measurement). Describe comparability of assessment methods if there is more than one group</p>                                                                                                                                                                                                                                                                                                                                                                                                                                                                                                                            |  |                                                                                                                                                                                                                                                                                                                                                                                                                                                                                                                                                                                                                                                                                                      | <p>Pg 6-8</p>                                                             |

|                                                                                                                                              |                                  |    |                                                                                                                                                                                                                                                                                                                                                                                                                                                                                                                                                                      |                                                                                                                                                       |                 |
|----------------------------------------------------------------------------------------------------------------------------------------------|----------------------------------|----|----------------------------------------------------------------------------------------------------------------------------------------------------------------------------------------------------------------------------------------------------------------------------------------------------------------------------------------------------------------------------------------------------------------------------------------------------------------------------------------------------------------------------------------------------------------------|-------------------------------------------------------------------------------------------------------------------------------------------------------|-----------------|
| 1<br>2<br>3<br>4<br>5<br>6<br>7<br>8<br>9<br>10                                                                                              | Bias                             | 9  | Describe any efforts to address potential sources of bias                                                                                                                                                                                                                                                                                                                                                                                                                                                                                                            |                                                                                                                                                       | Pg 18-19        |
| 11<br>12<br>13<br>14<br>15<br>16<br>17<br>18<br>19<br>20<br>21<br>22<br>23<br>24<br>25<br>26<br>27<br>28<br>29<br>30<br>31<br>32<br>33<br>34 | Study size                       | 10 | Explain how the study size was arrived at                                                                                                                                                                                                                                                                                                                                                                                                                                                                                                                            |                                                                                                                                                       | Pg 7            |
| 35<br>36<br>37<br>38<br>39<br>40<br>41<br>42<br>43<br>44                                                                                     | Quantitative variables           | 11 | Explain how quantitative variables were handled in the analyses. If applicable, describe which groupings were chosen, and why                                                                                                                                                                                                                                                                                                                                                                                                                                        |                                                                                                                                                       | NA              |
| 45<br>46<br>47                                                                                                                               | Statistical methods              | 12 | (a) Describe all statistical methods, including those used to control for confounding<br>(b) Describe any methods used to examine subgroups and interactions<br>(c) Explain how missing data were addressed<br>(d) <i>Cohort study</i> - If applicable, explain how loss to follow-up was addressed<br><i>Case-control study</i> - If applicable, explain how matching of cases and controls was addressed<br><i>Cross-sectional study</i> - If applicable, describe analytical methods taking account of sampling strategy<br>(e) Describe any sensitivity analyses |                                                                                                                                                       | Pg 6-11         |
|                                                                                                                                              | Data access and cleaning methods |    | ..                                                                                                                                                                                                                                                                                                                                                                                                                                                                                                                                                                   | RECORD 12.1: Authors should describe the extent to which the investigators had access to the database population used to create the study population. | Pg 6, Figure S1 |

|                  |    |                                                                                                                                                                                                                                                                                                                                                 |  |                                                                                                                                                                                                                                                                                                                    |                                                                                                            |
|------------------|----|-------------------------------------------------------------------------------------------------------------------------------------------------------------------------------------------------------------------------------------------------------------------------------------------------------------------------------------------------|--|--------------------------------------------------------------------------------------------------------------------------------------------------------------------------------------------------------------------------------------------------------------------------------------------------------------------|------------------------------------------------------------------------------------------------------------|
|                  |    |                                                                                                                                                                                                                                                                                                                                                 |  | RECORD 12.2: Authors should provide information on the data cleaning methods used in the study.                                                                                                                                                                                                                    | Pg 7                                                                                                       |
| Linkage          |    | ..                                                                                                                                                                                                                                                                                                                                              |  | RECORD 12.3: State whether the study included person-level, institutional-level, or other data linkage across two or more databases. The methods of linkage and methods of linkage quality evaluation should be provided.                                                                                          | Pg 6<br>Linkage was not performed by the research team, rather linked data are obtained from CPRD directly |
| <b>Results</b>   |    |                                                                                                                                                                                                                                                                                                                                                 |  |                                                                                                                                                                                                                                                                                                                    |                                                                                                            |
| Participants     | 13 | (a) Report the numbers of individuals at each stage of the study ( <i>e.g.</i> , numbers potentially eligible, examined for eligibility, confirmed eligible, included in the study, completing follow-up, and analysed)<br>(b) Give reasons for non-participation at each stage.<br>(c) Consider use of a flow diagram                          |  | RECORD 13.1: Describe in detail the selection of the persons included in the study ( <i>i.e.</i> , study population selection) including filtering based on data quality, data availability and linkage. The selection of included persons can be described in the text and/or by means of the study flow diagram. | Pg 5                                                                                                       |
| Descriptive data | 14 | (a) Give characteristics of study participants ( <i>e.g.</i> , demographic, clinical, social) and information on exposures and potential confounders<br>(b) Indicate the number of participants with missing data for each variable of interest<br>(c) <i>Cohort study</i> - summarise follow-up time ( <i>e.g.</i> , average and total amount) |  |                                                                                                                                                                                                                                                                                                                    | Table 2                                                                                                    |
| Outcome data     | 15 | <i>Cohort study</i> - Report numbers of outcome events or summary measures over time<br><i>Case-control study</i> - Report numbers in each exposure                                                                                                                                                                                             |  |                                                                                                                                                                                                                                                                                                                    | Figure S1                                                                                                  |

1  
2  
3  
4  
5  
6  
7  
8  
9  
10  
11  
12  
13  
14  
15  
16  
17  
18  
19  
20  
21  
22  
23  
24  
25  
26  
27  
28  
29  
30  
31  
32  
33  
34  
35  
36  
37  
38  
39  
40  
41  
42  
43  
44  
45  
46  
47

|                   |    |                                                                                                                                                                                                                                                                                                                                                                                                                 |  |                                                                                                                                                                                                                                                                                                          |                                                 |
|-------------------|----|-----------------------------------------------------------------------------------------------------------------------------------------------------------------------------------------------------------------------------------------------------------------------------------------------------------------------------------------------------------------------------------------------------------------|--|----------------------------------------------------------------------------------------------------------------------------------------------------------------------------------------------------------------------------------------------------------------------------------------------------------|-------------------------------------------------|
|                   |    | category, or summary measures of exposure<br><i>Cross-sectional study</i> - Report numbers of outcome events or summary measures                                                                                                                                                                                                                                                                                |  |                                                                                                                                                                                                                                                                                                          |                                                 |
| Main results      | 16 | (a) Give unadjusted estimates and, if applicable, confounder-adjusted estimates and their precision (e.g., 95% confidence interval). Make clear which confounders were adjusted for and why they were included<br>(b) Report category boundaries when continuous variables were categorized<br>(c) If relevant, consider translating estimates of relative risk into absolute risk for a meaningful time period |  |                                                                                                                                                                                                                                                                                                          | Table 3<br><br>Supp. Table S3 caption<br><br>NA |
| Other analyses    | 17 | Report other analyses done— e.g., analyses of subgroups and interactions, and sensitivity analyses                                                                                                                                                                                                                                                                                                              |  |                                                                                                                                                                                                                                                                                                          | NA                                              |
| <b>Discussion</b> |    |                                                                                                                                                                                                                                                                                                                                                                                                                 |  |                                                                                                                                                                                                                                                                                                          |                                                 |
| Key results       | 18 | Summarise key results with reference to study objectives                                                                                                                                                                                                                                                                                                                                                        |  |                                                                                                                                                                                                                                                                                                          | Pg 12-16                                        |
| Limitations       | 19 | Discuss limitations of the study, taking into account sources of potential bias or imprecision. Discuss both direction and magnitude of any potential bias                                                                                                                                                                                                                                                      |  | RECORD 19.1: Discuss the implications of using data that were not created or collected to answer the specific research question(s). Include discussion of misclassification bias, unmeasured confounding, missing data, and changing eligibility over time, as they pertain to the study being reported. | Pg 13                                           |
| Interpretation    | 20 | Give a cautious overall interpretation of results considering objectives,                                                                                                                                                                                                                                                                                                                                       |  |                                                                                                                                                                                                                                                                                                          | Pg 17-20                                        |

|                                                           |    |                                                                                                                                                               |  |                                                                                                                                                          |       |
|-----------------------------------------------------------|----|---------------------------------------------------------------------------------------------------------------------------------------------------------------|--|----------------------------------------------------------------------------------------------------------------------------------------------------------|-------|
|                                                           |    | limitations, multiplicity of analyses, results from similar studies, and other relevant evidence                                                              |  |                                                                                                                                                          |       |
| Generalisability                                          | 21 | Discuss the generalisability (external validity) of the study results                                                                                         |  |                                                                                                                                                          | Pg 20 |
| <b>Other Information</b>                                  |    |                                                                                                                                                               |  |                                                                                                                                                          |       |
| Funding                                                   | 22 | Give the source of funding and the role of the funders for the present study and, if applicable, for the original study on which the present article is based |  |                                                                                                                                                          | Pg 21 |
| Accessibility of protocol, raw data, and programming code |    | ..                                                                                                                                                            |  | RECORD 22.1: Authors should provide information on how to access any supplemental information such as the study protocol, raw data, or programming code. | Pg 22 |

\*Reference: Benchimol EI, Smeeth L, Guttman A, Harron K, Moher D, Petersen I, Sørensen HT, von Elm E, Langan SM, the RECORD Working Committee. The REporting of studies Conducted using Observational Routinely-collected health Data (RECORD) Statement. *PLoS Medicine* 2015; in press.

\*Checklist is protected under Creative Commons Attribution ([CC BY](https://creativecommons.org/licenses/by/4.0/)) license.

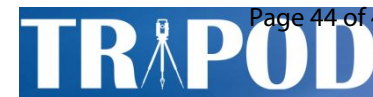

TRIPOD Checklist: Prediction Model Development and Validation

| Section/Topic                | Item | Checklist Item | Page                                                                                                                                                                                                  |            |
|------------------------------|------|----------------|-------------------------------------------------------------------------------------------------------------------------------------------------------------------------------------------------------|------------|
| <b>Title and abstract</b>    |      |                |                                                                                                                                                                                                       |            |
| Title                        | 1    | D;V            | Identify the study as developing and/or validating a multivariable prediction model, the target population, and the outcome to be predicted.                                                          | 1          |
| Abstract                     | 2    | D;V            | Provide a summary of objectives, study design, setting, participants, sample size, predictors, outcome, statistical analysis, results, and conclusions.                                               | 2-3        |
| <b>Introduction</b>          |      |                |                                                                                                                                                                                                       |            |
| Background and objectives    | 3a   | D;V            | Explain the medical context (including whether diagnostic or prognostic) and rationale for developing or validating the multivariable prediction model, including references to existing models.      | 4-5        |
|                              | 3b   | D;V            | Specify the objectives, including whether the study describes the development or validation of the model or both.                                                                                     | 5          |
| <b>Methods</b>               |      |                |                                                                                                                                                                                                       |            |
| Source of data               | 4a   | D;V            | Describe the study design or source of data (e.g., randomized trial, cohort, or registry data), separately for the development and validation data sets, if applicable.                               | 6          |
|                              | 4b   | D;V            | Specify the key study dates, including start of accrual; end of accrual; and, if applicable, end of follow-up.                                                                                        | 6          |
| Participants                 | 5a   | D;V            | Specify key elements of the study setting (e.g., primary care, secondary care, general population) including number and location of centres.                                                          | 6          |
|                              | 5b   | D;V            | Describe eligibility criteria for participants.                                                                                                                                                       | 6          |
|                              | 5c   | D;V            | Give details of treatments received, if relevant.                                                                                                                                                     | NA         |
| Outcome                      | 6a   | D;V            | Clearly define the outcome that is predicted by the prediction model, including how and when assessed.                                                                                                | 7-8        |
|                              | 6b   | D;V            | Report any actions to blind assessment of the outcome to be predicted.                                                                                                                                | NA         |
| Predictors                   | 7a   | D;V            | Clearly define all predictors used in developing or validating the multivariable prediction model, including how and when they were measured.                                                         | 8-9        |
|                              | 7b   | D;V            | Report any actions to blind assessment of predictors for the outcome and other predictors.                                                                                                            | NA         |
| Sample size                  | 8    | D;V            | Explain how the study size was arrived at.                                                                                                                                                            | 7          |
| Missing data                 | 9    | D;V            | Describe how missing data were handled (e.g., complete-case analysis, single imputation, multiple imputation) with details of any imputation method.                                                  | 9          |
| Statistical analysis methods | 10a  | D              | Describe how predictors were handled in the analyses.                                                                                                                                                 | 8-9        |
|                              | 10b  | D              | Specify type of model, all model-building procedures (including any predictor selection), and method for internal validation.                                                                         | 9-10       |
|                              | 10c  | V              | For validation, describe how the predictions were calculated.                                                                                                                                         | 10-11      |
|                              | 10d  | D;V            | Specify all measures used to assess model performance and, if relevant, to compare multiple models.                                                                                                   | 11         |
|                              | 10e  | V              | Describe any model updating (e.g., recalibration) arising from the validation, if done.                                                                                                               | 11         |
| Risk groups                  | 11   | D;V            | Provide details on how risk groups were created, if done.                                                                                                                                             | 11         |
| Development vs. validation   | 12   | V              | For validation, identify any differences from the development data in setting, eligibility criteria, outcome, and predictors.                                                                         | 10         |
| <b>Results</b>               |      |                |                                                                                                                                                                                                       |            |
| Participants                 | 13a  | D;V            | Describe the flow of participants through the study, including the number of participants with and without the outcome and, if applicable, a summary of the follow-up time. A diagram may be helpful. | Fig S1     |
|                              | 13b  | D;V            | Describe the characteristics of the participants (basic demographics, clinical features, available predictors), including the number of participants with missing data for predictors and outcome.    | Tab 2      |
|                              | 13c  | V              | For validation, show a comparison with the development data of the distribution of important variables (demographics, predictors and outcome).                                                        | Sup Fig S2 |
| Model development            | 14a  | D              | Specify the number of participants and outcome events in each analysis.                                                                                                                               | Fig S1     |
|                              | 14b  | D              | If done, report the unadjusted association between each candidate predictor and outcome.                                                                                                              | NA         |
| Model specification          | 15a  | D              | Present the full prediction model to allow predictions for individuals (i.e., all regression coefficients, and model intercept or baseline survival at a given time point).                           | Tab 3      |
|                              | 15b  | D              | Explain how to use the prediction model.                                                                                                                                                              | 13         |
| Model performance            | 16   | D;V            | Report performance measures (with CIs) for the prediction model.                                                                                                                                      | Tab 4      |
| Model-updating               | 17   | V              | If done, report the results from any model updating (i.e., model specification, model performance).                                                                                                   | 19-20      |
| <b>Discussion</b>            |      |                |                                                                                                                                                                                                       |            |
| Limitations                  | 18   | D;V            | Discuss any limitations of the study (such as nonrepresentative sample, few events per predictor, missing data).                                                                                      | 13         |
| Interpretation               | 19a  | V              | For validation, discuss the results with reference to performance in the development data, and any other validation data.                                                                             | Tab 4      |
|                              | 19b  | D;V            | Give an overall interpretation of the results, considering objectives, limitations, results from similar studies, and other relevant evidence.                                                        | 18-19      |
| Implications                 | 20   | D;V            | Discuss the potential clinical use of the model and implications for future research.                                                                                                                 | 20         |
| <b>Other information</b>     |      |                |                                                                                                                                                                                                       |            |
| Supplementary information    | 21   | D;V            | Provide information about the availability of supplementary resources, such as study protocol, Web calculator, and data sets.                                                                         | 22         |
| Funding                      | 22   | D;V            | Give the source of funding and the role of the funders for the present study.                                                                                                                         | 21         |

\*Items relevant only to the development of a prediction model are denoted by D, items relating solely to a validation of a prediction model are denoted by V, and items relating to both are denoted D;V. We recommend using the TRIPOD Checklist in conjunction with the TRIPOD Explanation and Elaboration document.

# BMJ Open

## Prediction of Type 2 diabetes risk in people with non-diabetic hyperglycaemia: model derivation and validation using UK primary care data

|                                 |                                                                                                                                                                                                                                                                                                                                                                                                    |
|---------------------------------|----------------------------------------------------------------------------------------------------------------------------------------------------------------------------------------------------------------------------------------------------------------------------------------------------------------------------------------------------------------------------------------------------|
| Journal:                        | <i>BMJ Open</i>                                                                                                                                                                                                                                                                                                                                                                                    |
| Manuscript ID                   | bmjopen-2020-037937.R1                                                                                                                                                                                                                                                                                                                                                                             |
| Article Type:                   | Original research                                                                                                                                                                                                                                                                                                                                                                                  |
| Date Submitted by the Author:   | 29-Jul-2020                                                                                                                                                                                                                                                                                                                                                                                        |
| Complete List of Authors:       | Coles, Briana; University of Leicester, Khunti, Kamlesh; University of Leicester, Department of Health Sciences Booth, Sarah; University of Leicester, Department of Health Sciences Zaccardi, Francesco; University of Leicester, Diabetes Research Centre Davies, Melanie; University of Leicester, Diabetes Research Centre Gray, Laura; University of Leicester, Department of Health Sciences |
| <b>Primary Subject Heading</b>: | Diabetes and endocrinology                                                                                                                                                                                                                                                                                                                                                                         |
| Secondary Subject Heading:      | Patient-centred medicine, General practice / Family practice, Epidemiology, Evidence based practice, Diagnostics                                                                                                                                                                                                                                                                                   |
| Keywords:                       | General diabetes < DIABETES & ENDOCRINOLOGY, PRIMARY CARE, EPIDEMIOLOGY, Health policy < HEALTH SERVICES ADMINISTRATION & MANAGEMENT, Risk management < HEALTH SERVICES ADMINISTRATION & MANAGEMENT, Diabetes & endocrinology < INTERNAL MEDICINE                                                                                                                                                  |
|                                 |                                                                                                                                                                                                                                                                                                                                                                                                    |

SCHOLARONE™  
Manuscripts



I, the Submitting Author has the right to grant and does grant on behalf of all authors of the Work (as defined in the below author licence), an exclusive licence and/or a non-exclusive licence for contributions from authors who are: i) UK Crown employees; ii) where BMJ has agreed a CC-BY licence shall apply, and/or iii) in accordance with the terms applicable for US Federal Government officers or employees acting as part of their official duties; on a worldwide, perpetual, irrevocable, royalty-free basis to BMJ Publishing Group Ltd ("BMJ") its licensees and where the relevant Journal is co-owned by BMJ to the co-owners of the Journal, to publish the Work in this journal and any other BMJ products and to exploit all rights, as set out in our [licence](#).

The Submitting Author accepts and understands that any supply made under these terms is made by BMJ to the Submitting Author unless you are acting as an employee on behalf of your employer or a postgraduate student of an affiliated institution which is paying any applicable article publishing charge ("APC") for Open Access articles. Where the Submitting Author wishes to make the Work available on an Open Access basis (and intends to pay the relevant APC), the terms of reuse of such Open Access shall be governed by a Creative Commons licence – details of these licences and which [Creative Commons](#) licence will apply to this Work are set out in our licence referred to above.

Other than as permitted in any relevant BMJ Author's Self Archiving Policies, I confirm this Work has not been accepted for publication elsewhere, is not being considered for publication elsewhere and does not duplicate material already published. I confirm all authors consent to publication of this Work and authorise the granting of this licence.



# Prediction of Type 2 diabetes risk in people with non-diabetic hyperglycaemia: model derivation and validation using UK primary care data

## Short running title

Type 2 diabetes risk prediction in people with non-diabetic hyperglycaemia

## Authors

Briana Coles<sup>1,3</sup>, Kamlesh Khunti<sup>1,3</sup>, Sarah Booth<sup>2</sup>, Francesco Zaccardi<sup>1,3</sup>, Melanie J Davies<sup>3</sup>, Laura J Gray<sup>2</sup>

## Affiliations

<sup>1</sup>Leicester Real World Evidence Unit, Diabetes Research Centre, University of Leicester, Leicester, UK.

<sup>2</sup>Department of Health Sciences, University of Leicester, Leicester, UK.

<sup>3</sup>Diabetes Research Centre, University of Leicester, Leicester General Hospital, Leicester, UK.

## Corresponding author

Briana Coles, bc188@leicester.ac.uk

Gwendolen Rd, Leicester LE5 4PW, UK

Tel: +44 (0) 734 213 7177

Email: bc188@le.ac.uk

## Word count

Abstract: 284

Main Text: 4,466

Tables 4; RECORD checklist; TRIPOD checklist; ISAC application; Supplementary Tables 4; Supplementary Figures 4

## Keywords

Type 2 Diabetes Mellitus; Prediabetic State; Hyperglycaemia; Preventive Medicine; Preventive Health Services; Evidence-Based Practice; Risk prediction; biostatistics

**ABSTRACT**

**Objective:** Using primary care data, develop and validate sex-specific prognostic models that estimate the ten year risk of people with non-diabetic hyperglycaemia developing Type 2 diabetes.

**Design:** Retrospective cohort study

**Setting:** Primary care

**Participants:** 154,705 adult patients with non-diabetic hyperglycaemia

Primary outcome: Development of type 2 diabetes

**Methods:** This study used data routinely collected in UK primary care from general practices contributing to the Clinical Practice Research Datalink. Patients were split into development (n=109,077) and validation datasets (n=45,628). Potential predictor variables- including demographic and lifestyle factors, medical and family history, prescribed medications, and clinical measures- were included in survival models following the imputation of missing data. Measures of calibration at 10 years and discrimination were determined using the validation dataset.

**Results:** In the development dataset, 9,332 patients developed Type 2 diabetes during 293,238 person-years of follow-up (31.8 [95% CI 31.2-32.5] per 1,000 person-years). In the validation dataset, 3,783 patients developed Type 2 diabetes during 115,113 person-years of follow-up (32.9 [95% CI 31.8-33.9] per 1,000 person-years). The final prognostic models comprised 14 and 16 predictor variables for males and females, respectively. Both models had good calibration and high levels of discrimination. The performance statistics for the male model were: Harrell's C statistic of 0.700 in the development and 0.701 in the validation dataset, with a calibration slope of 0.974 (95% CI 0.905-1.042) in the validation dataset. For the female model, Harrell's C statistics were 0.720 and 0.718, respectively, while the calibration slope was 0.994 (95% CI 0.931-1.057) in the validation dataset.

1  
2  
3 **Conclusion:** These models could be used in primary care to identify those with non-diabetic  
4 hyperglycaemia most at risk of developing Type 2 diabetes for targeted referral to the National Health  
5 Service Diabetes Prevention Programme.  
6  
7  
8  
9  
10  
11  
12  
13  
14  
15  
16  
17  
18  
19  
20  
21  
22  
23  
24  
25  
26  
27  
28  
29  
30  
31  
32  
33  
34  
35  
36  
37  
38  
39  
40  
41  
42  
43  
44  
45  
46  
47  
48  
49  
50  
51  
52  
53  
54  
55  
56  
57  
58  
59  
60

For peer review only

## STRENGTHS AND LIMITATIONS

### Strengths

- A large, representative primary care database was used to develop the models using HbA1c to quantify blood glucose.
- A range of predictors were considered specifically selected due to clinical relevance to development of Type 2 diabetes.

### Limitations

- The cohort was split into development and validation datasets instead of using a fully external database to validate the model, but given the size of the cohort and the large number of events, this likely had little effect on model development.
- The outcome for this study was defined using a single medcode or test result indicating Type 2 diabetes.

## INTRODUCTION

People with blood glucose levels raised beyond normal but not high enough for a formal diagnosis of Type 2 diabetes (i.e. HbA1c 6.0-6.4% or 42-47 mmol/mol) are at high risk of eventually developing Type 2 diabetes. This high risk state has been termed non-diabetic hyperglycaemia (NDH) or prediabetes (1). In 2015 in England it was estimated that there were five million people aged 16 years and over with NDH, a prevalence of 11.4% (1). The prevalence was much lower in people younger than 40 years of age, with the exception of minority ethnic populations (1). Evidence from large-scale clinical trials has shown that the development of Type 2 diabetes can be delayed or even prevented if those with NDH are enrolled into a diabetes prevention programme (2, 3).

Diabetes prevention programmes encourage participants to change their behaviour with a focus on increasing physical activity, improving diet quality and reducing weight. These programmes have been developed and tested internationally (2, 4-6). Initially studies focused on very intensive programmes – for example a programme developed and tested within the US involved 16 one to one individualised sessions over six months, followed by monthly individual and group based sessions to reinforce messages (4). Over a mean follow-up of 2.8 years, there was a 58% reduction (95% CI 48%-66%) in the risk of Type 2 diabetes in those randomised to receive the prevention programme compared to standard care (4). Other studies conducted in Finland and China with similar programmes found comparable results (5, 6). Such resource intensive programmes, although very effective, are not viable for delivery within an NHS setting.

Therefore, emphasis shifted to developing a more pragmatic programme that could be delivered in a group setting and requires less contact time. The National Health Service's Diabetes Prevention Programme (NHS DPP) launched in 2016 and is open to adults with NDH (7, 8). The NHS estimates that once the NHS DPP is fully rolled out in 2020, 100,000 people will access the programme each year (9). Based on this, it will take over 50 years for all those with NDH to access the programme.

1  
2  
3  
4  
5 Many prognostic and diagnostic models have been developed and validated for identifying those with  
6 undiagnosed Type 2 diabetes, NDH or those at risk of developing Type 2 diabetes (10-12). Evidence  
7 shows that the risk of developing Type 2 diabetes in those with NDH is variable. Some people with  
8 NDH will revert to normal glucose levels over time, with only a subset going on to develop Type 2  
9 diabetes (13). Indeed referring all patients with NDH to the DPP is overtreatment in the majority of  
10 cases (14). Therefore, in the era of big data and personalised medicine, utilising data stored in primary  
11 care to target referrals to those at highest risk may be a more efficient use of the NHS DPP than the  
12 current blanket referral approach.  
13  
14  
15  
16  
17  
18  
19  
20  
21  
22  
23  
24  
25  
26  
27  
28  
29  
30  
31  
32  
33  
34  
35  
36  
37  
38  
39  
40  
41  
42  
43  
44  
45  
46  
47  
48  
49  
50  
51  
52  
53  
54  
55  
56  
57  
58  
59  
60

To date no validated risk assessments for use in those with NDH have been developed for use in the  
UK. Therefore, we developed and validated sex-specific prognostic models to quantify the 10-year risk  
of those with NDH developing Type 2 diabetes using data routinely collected in primary care. Such  
models should be used to target referrals to the NHS DPP.

## METHODS

### Study design and data source

This observational retrospective cohort study included a sample of primary care patients from the UK who were registered with practices contributing to the Clinical Practice Research Datalink (CPRD). The CPRD includes anonymised primary care electronic health records for over 11.3 million patients from 674 UK practices dating back to 1987 (15). The CPRD includes data for approximately 6.9% of the UK population and is broadly representative of the age, sex and ethnicity of the UK general population (15). When available, patients were also linked to Office of National Statistics (ONS) to obtain the date of death and Hospital Episode Statistics (HES) to obtain ethnicity (both available for 59% of patients in the study cohort). Linked Index of Multiple Deprivation data (quintiles) were also obtained. Approval by the CPRD Independent Scientific Advisory Committee was granted for this study (approved protocol number 18\_238).

This study included an open cohort of patients registered in CPRD aged 18 years or older with NDH. NDH was defined as an HbA1c measure within 42-47 mmol/mol (6.0-6.4%). For each patient, the index date was defined as the first recorded test measurement indicating NDH between January 1, 2000 and December 31, 2017. Patients with a diagnosis of Type 2 or Type 1 diabetes before the index date were excluded. Patients with an HbA1c measure greater than 47 mmol/mol (6.4%), random blood glucose measure greater than 11.0 mmol/L (199 mg/dL), or fasting plasma glucose measure greater than 6.9 mmol/L before the index date were also excluded as these patients were assumed to be in the process of confirming a diagnosis of Type 2 diabetes. Patients prescribed metformin, the current first line therapy for Type 2 diabetes, were also excluded. Patients were followed up for a maximum of 10 years until diagnosis of Type 2 diabetes, or censoring (transferring out of practice, death, or the end of study on December 31, 2017, whichever came first).

1  
2  
3 The cohort was split into a development and validation dataset. To split the cohort, practices of  
4 registration were stratified by region and patients were clustered by practice (Supplementary Table  
5 S1). Approximately 33% of practices in each region were randomly assigned to the validation dataset.  
6  
7  
8  
9  
10

### 11 **Sample size**

12  
13  
14 There were 71,063 males and 83,642 females meeting the inclusion criteria (Supplementary Figure  
15 S1). This resulted in 50,049 males and 59,028 females in the development dataset and 21,014 males  
16 and 24,614 females in the validation dataset. Within the development dataset, 4,719 males and 4,613  
17 females developed Type 2 diabetes. Riley *et al.* have proposed an approach for calculating the  
18 minimum number of events per predictor parameter for a survival model based on the model's  
19 anticipated R squared, event rate, follow up time and number of predictor parameters (16). We used  
20 the R squared, event rate, and mean follow up for men and women from a similar study to estimate  
21 the required sample size.(17) For women, based on 31 predictor parameters (deprivation has five  
22 categories) considered for our study, the required minimum sample size was 3,406. For men, based  
23 on 29 predictor parameters considered for our study, the required minimum sample size was 2,585.  
24  
25  
26  
27  
28  
29  
30  
31  
32  
33  
34  
35  
36  
37  
38

### 39 **Outcome**

40  
41 The outcome was the first diagnosis of Type 2 diabetes recorded within the CPRD between January 1,  
42 2000 and December 31, 2017. The first diagnosis of Type 2 diabetes was identified by medcode; HbA1c  
43 measure greater than 47 mmol/mol (6.4%); random blood glucose measure greater than 11.0 mmol/L  
44 (199 mg/dL); or fasting plasma glucose measure greater than 6.9 mmol/L.  
45  
46  
47  
48  
49  
50  
51

### 52 **Predictor variables**

53  
54 We examined potential predictor variables based on established risk factors for Type 2 diabetes and  
55 those risk factors included in existing risk scores for Type 2 diabetes related outcomes (10-12, 17, 18).  
56  
57 Table 1 shows the predictor variables considered.  
58  
59  
60



**Table 1.** Potential predictor variables

| Demographic information                     |                                  |
|---------------------------------------------|----------------------------------|
| Age                                         | Ethnicity                        |
| Sex                                         | Deprivation                      |
| Medical/family history                      |                                  |
| Family history of diabetes                  | Polycystic ovary syndrome (PCOS) |
| Cardiovascular disease                      | Sleep apnoea                     |
| Schizophrenia or bipolar affective disorder | Depression                       |
| Learning disabilities                       | Renal/kidney disease             |
| Gestational diabetes                        |                                  |
| Prescribed medications                      |                                  |
| Antihypertensives                           | Statins                          |
| Corticosteroids                             | Aspirin                          |
| Second generation "atypical" antipsychotics |                                  |
| Clinical measurements                       |                                  |
| HbA1c                                       | Pulse rate                       |
| Body mass index (BMI)                       | Serum cholesterol                |
| Systolic blood pressure                     | Liver function test              |
| Diastolic blood pressure                    | Waist circumference              |
| Lifestyle factors                           |                                  |
| Smoking status                              | Alcohol use                      |

Data on demographic factors, medical and family history, prescribed medications, clinical measurements, and lifestyle factors were obtained from CPRD (and HES for ethnicity). Age in single years at the index date was used. Ethnicity was derived from HES as white or non-white and when unavailable, the most recent code in CPRD was used. Deprivation was measured using the 2010 Index of Multiple Deprivation quintiles (1=least material deprivation; 5=most material deprivation). The closest value to the index date was selected for continuous measures including BMI, systolic and diastolic blood pressure, pulse rate, serum cholesterol, liver function test, and waist circumference, restricting to values recorded within six months before the index date. BMI is automatically calculated within the medical record based on input height and weight. Biologically implausible values were excluded including serum cholesterol outside of 1-15 mmol/L, systolic blood pressure outside of 20-250 mmHg, diastolic blood pressure outside of 30-150 mmHg, and BMI outside of 9-96 kg/m<sup>2</sup>. Prescribed medications (yes or no) were determined from one or more prescription records within six months before the index date. Alcohol use (entity type=5) and smoking (entity type=4) were defined using records indicating current smoking or alcohol use within one year before the index date. All

1  
2  
3 others were considered non-current smokers and/or alcohol users- including former smokers and/or  
4 alcohol users. Medical and family history was determined from a diagnosis code before the index date.  
5  
6  
7  
8  
9

### 10 **Handling of missing data**

11  
12 Potential predictor variables with missing data for more than 33.3% of the study cohort were  
13 excluded, as these are most likely not collected as part of routine primary care (Supplementary Table  
14 S2). Assuming data were missing at random and based on previous research, multiple imputation was  
15 used to generate five imputed datasets (17, 19). Missing ethnicity (white or non-white), serum  
16 cholesterol, and systolic and diastolic blood pressure were imputed using chained equations.  
17  
18  
19  
20  
21  
22  
23  
24  
25

### 26 **Development of the models**

27  
28 Modelling was performed using the Stata `stpm2` command for fitting flexible parametric survival  
29 models on the log cumulative hazard scale (20). Null flexible parametric models were fitted to estimate  
30 Type 2 diabetes risk using between one and five degrees of freedom to model the baseline hazard  
31 function: the final degrees of freedom was determined from visual examination of the plots of the  
32 baseline hazard functions as well as Akaike information criterion (AIC) and Bayesian information  
33 criterion (BIC) statistics. Multivariable fractional polynomial models were considered that included  
34 fractional polynomial transformations of potential continuous predictor variables. This process selects  
35 fractional polynomial models that best predict the outcome of interest. Then, manual backwards  
36 stepwise selection was used to eliminate variables that did not contribute significantly to the model  
37 using a significance threshold typical for prognostic model research of  $p=0.20$  (21). Clinically relevant  
38 variables determined *a priori* including HbA1c, sex, and age were forced to remain in the model  
39 regardless of the p-value.  
40  
41  
42  
43  
44  
45  
46  
47  
48  
49  
50  
51  
52  
53  
54  
55  
56

57 From here, two separate sex-specific models were developed. The model for females considered all  
58 of the potential predictor variables available for at least 66.6% of the study cohort. The model for  
59  
60

1  
2  
3 males did not include polycystic ovarian syndrome or gestational diabetes as potential predictor  
4 variables. The following steps were followed separately for the male and female models: 1) flexible  
5 parametric modelling was used to fit the final prognostic model and Rubin's rules were applied to  
6  
7 combine the results across the imputed datasets; 2) the linear predictor was calculated for each  
8 patient; 3) Harrell's C statistics, Somers' D statistics, and calibration slopes were calculated for each  
9 imputed dataset and averaged (22).

### 18 19 **Validation of the models**

20  
21 The models were internally validated to correct for over-fitting. Internal validation was performed  
22 separately for the male and female models. The same methodology used for multiple imputation in  
23 the development dataset was used for the validation dataset. Internal validation was performed as  
24 described by Harrell *et al.* and Snee (23, 24). The developed model was applied to the validation  
25 dataset and the performance was quantified (23). A global shrinkage factor (the mean calibration  
26 slope) was applied to the beta coefficients from the developed model. The restricted cubic splines and  
27 constant relating to the baseline of the model were re-estimated to maintain overall calibration (25).

28  
29  
30 Four risk groups (high, medium high, medium low, and low) were defined by the 15<sup>th</sup>, 50<sup>th</sup> and 85<sup>th</sup>  
31 percentiles of the linear predictor (the model's prognostic index distribution). A Kaplan–Meier  
32 curve was plotted for all four groups. Discrimination was visualised by the difference in observed Type  
33  
34  
35  
36  
37  
38  
39  
40  
41  
42  
43  
44  
45  
46  
47  
48  
49  
50  
51  
52  
53  
54  
55  
56  
57  
58  
59  
60  
2 diabetes-free probability among the groups.

To evaluate the calibration, each imputed dataset was divided into deciles based on the linear  
predictor of Type 2 diabetes risk. The predicted probability of developing Type 2 diabetes (x-axis) and  
the observed fraction that developed Type 2 diabetes at 10 years (y-axis) were plotted for each decile  
risk group. The slope of this line is the calibration slope; a reference line showing perfect calibration  
was also plotted.

1  
2  
3  
4  
5 All analyses were performed in Stata 15 and SAS v9.4; nominal statistical significance was defined at  
6  
7  
8 p<0.05.  
9  
10

### 11 **Patient and public involvement**

12  
13  
14 Members of the public were involved in the priority-setting and question-development stages of this  
15  
16  
17 study.  
18  
19  
20  
21  
22  
23  
24  
25  
26  
27  
28  
29  
30  
31  
32  
33  
34  
35  
36  
37  
38  
39  
40  
41  
42  
43  
44  
45  
46  
47  
48  
49  
50  
51  
52  
53  
54  
55  
56  
57  
58  
59  
60

For peer review only

## RESULTS

### Study population

A total of 289,754 adult patients were identified from CPRD with an HbA1c test result indicating NDH on or before December 31, 2017. Patients were excluded if they had pre-existing Type 2 diabetes (n=58,296) or Type 1 diabetes (n=822). Patients with one or more prescriptions for metformin within six months before the index date were also excluded (n=10,260). Patients were further excluded if the first recorded test indicating NDH occurred before the start of the study on January 1, 2000 (n=65,370), or if the date of death preceded the date of the first recorded test indicating NDH (n=301) as these data were likely misreported. There were 154,705 patients that met the inclusion criteria and were included in the cohort (Supplementary Figure S1); 109,077 patients were included in the development dataset (50,049 males and 59,028 females) and 45,628 patients in the validation dataset (21,014 males and 24,614 females).

In the development dataset, there were 9,332 patients, including 4,719 males and 4,613 females, diagnosed with Type 2 diabetes during a total of 293,238 person-years of follow-up. The mean follow-up for the development dataset was 2.7 years (SD 2.4, range 0-10 years). In the validation dataset, there were 3,783 patients, including 1,893 males and 1,890 females, diagnosed with Type 2 diabetes during a total of 115,113 person-years of follow-up. The mean follow-up for the validation dataset was 2.5 years (SD 2.3, range 0-10 years).

### Baseline characteristics

Table 2 shows the baseline characteristics of patients in the development and validation datasets and for patients with no missing data. The distributions of continuous variables in the development and validation datasets are shown in Supplementary Figure S2.

**Table 2.** Characteristics of cohort at the index date in total, by number of missing variables, and by dataset.

|                        |                         | Total            | Missing variables |                | Dataset        |                |
|------------------------|-------------------------|------------------|-------------------|----------------|----------------|----------------|
|                        |                         |                  | One or more       | None           | Development    | Validation     |
| Total                  |                         | N=154,705        | N=91,409          | N=63,296       | N=109,077      | N=45,628       |
| Age (years)            |                         | 64.9 (14.2)      | 64.2 (14.9)       | 65.9 (13.1)    | 64.8 (14.2)    | 65.0 (14.2)    |
| Sex                    | Male                    | 71,063 (45.9%)   | 40,518 (44.3%)    | 30,545 (48.3%) | 50,049 (45.9%) | 21,014 (46.1%) |
|                        | Female                  | 83,642 (54.1%)   | 50,891 (55.7%)    | 32,751 (51.7%) | 59,028 (54.1%) | 24,614 (53.9%) |
| Ethnicity              | Non-white               | 14,116 (12.4%)   | 6,683 (13.3%)     | 7,433 (11.7%)  | 10,239 (12.9%) | 3,877 (11.2%)  |
|                        | White                   | 99,468 (87.6%)   | 43,605 (86.7%)    | 55,863 (88.3%) | 68,870 (87.1%) | 30,598 (88.8%) |
|                        | Unknown                 | 41,121           | 41,121            | 0              | 29,968         | 11,153         |
| Current alcohol user   |                         | 31,722 (20.5%)   | 14,867 (16.3%)    | 16,855 (26.6%) | 22,320 (20.5%) | 9,402 (20.6%)  |
| Current smoker         |                         | 21,126 (13.7%)   | 11,677 (12.8%)    | 9,449 (14.9%)  | 14,861 (13.6%) | 6,265 (13.7%)  |
| Medication             | Antihypertensives       | 90,005 (58.2%)   | 47,424 (51.9%)    | 42,581 (67.3%) | 63,290 (58.0%) | 26,715 (58.5%) |
|                        | Atypical antipsychotics | 3,959 (2.6%)     | 2,541 (2.8%)      | 1,418 (2.2%)   | 2,845 (2.6%)   | 1,114 (2.4%)   |
|                        | Aspirin                 | 41,986 (27.1%)   | 22,404 (24.5%)    | 19,582 (30.9%) | 29,726 (27.3%) | 12,260 (26.9%) |
|                        | Corticosteroids         | 55,090 (35.6%)   | 33,167 (36.3%)    | 21,923 (34.6%) | 38,918 (35.7%) | 16,172 (35.4%) |
|                        | Statins                 | 74,166 (47.9%)   | 39,425 (43.1%)    | 34,741 (54.9%) | 52,393 (48.0%) | 21,773 (47.7%) |
| Medical/family history | Schizophrenia/bipolar   | 2,093 (1.4%)     | 1,189 (1.3%)      | 904 (1.4%)     | 1,493 (1.4%)   | 600 (1.3%)     |
|                        | Cardiovascular disease  | 18,483 (11.9%)   | 9,608 (10.5%)     | 8,875 (14.0%)  | 12,862 (11.8%) | 5,621 (12.3%)  |
|                        | Depression              | 42,364 (27.4%)   | 26,066 (28.5%)    | 16,298 (25.7%) | 29,627 (27.2%) | 12,737 (27.9%) |
|                        | Learning disability     | 744 (0.5%)       | 446 (0.5%)        | 298 (0.5%)     | 478 (0.4%)     | 266 (0.6%)     |
|                        | Diabetes in family      | 195 (0.1%)       | 117 (0.1%)        | 78 (0.1%)      | 159 (0.1%)     | 36 (0.1%)      |
|                        | PCOS                    | 840 (0.5%)       | 595 (0.7%)        | 245 (0.4%)     | 576 (0.5%)     | 264 (0.6%)     |
|                        | Gestational diabetes    | 762 (0.5%)       | 592 (0.6%)        | 170 (0.3%)     | 567 (0.5%)     | 195 (0.4%)     |
|                        | Renal/kidney disease    | 17,126 (11.1%)   | 9,109 (10.0%)     | 8,017 (12.7%)  | 11,810 (10.8%) | 5,316 (11.7%)  |
|                        | Sleep apnoea            | 2,289 (1.5%)     | 1,317 (1.4%)      | 972 (1.5%)     | 1,594 (1.5%)   | 695 (1.5%)     |
|                        | Clinical measures       | HbA1c (mmol/mol) | 43.5 (1.5)        | 43.5 (1.5)     | 43.5 (1.5)     | 43.5 (1.5)     |
| Cholesterol (mmol/L)   |                         | 5.2 (1.2)        | 5.3 (1.2)         | 5.2 (1.2)      | 5.2 (1.2)      | 5.2 (1.2)      |
| Systolic BP (mmHg)     |                         | 138.1 (18.5)     | 137.8 (18.8)      | 138.2 (18.4)   | 138.0 (18.6)   | 138.2 (18.5)   |
| Diastolic BP (mmHg)    |                         | 80.0 (11.0)      | 79.6 (11.0)       | 80.2 (11.0)    | 79.9 (11.0)    | 80.1 (10.9)    |

BP=blood pressure. PCOS= Polycystic ovarian syndrome. Continuous variables are given as the mean (SD). Categorical variables are given as the number (%). Index of multiple deprivation, BMI, pulse, liver function test, and waist circumference are not included in the table since these measures are not available for >33.3% of the cohort.

1  
2  
3 The development dataset included 54.1% female and 12.9% non-white ethnicity; corresponding  
4 values in the validation dataset were 53.9% and 11.2%. Within the development dataset, 20.5% of  
5 patients were current alcohol users and 13.6% were current smokers compared with 20.6% and 13.7%,  
6 respectively, within the validation dataset. The percentage of patients with prescriptions of each  
7 medication was similar between the development and validation datasets. The most commonly  
8 prescribed medication was antihypertensives (58.0% in the development and 58.5% in the validation  
9 dataset), while the least common was atypical antipsychotics (2.6% and 2.4%, respectively). Of the  
10 38,918 patients prescribed corticosteroids in the development dataset, 10,711 (27.5%) were  
11 prescribed oral medication, 19,192 were non-oral (49.3%), and 9,015 were prescribed both (23.2%;  
12 data not shown). For the validation dataset, there were 16,172 patients prescribed corticosteroids  
13 including 4,637 (28.7%) oral, 7,781 (48.1%) non-oral, and 3,754 prescribed both (23.2%). The  
14 medical/family history was similar between the development and validation datasets. The most  
15 common medical/family history condition was depression (27.2% in the development and 27.9% in  
16 the validation dataset), while the least common was a family history of diabetes (0.1% in both  
17 datasets). The mean HbA1c at the index date was the same for development and validation patients,  
18 43.5mmol/mol (SD 1.2) or 6.1% (0.1%). Further, observed cholesterol and blood pressure were similar  
19 between the development and validation datasets.  
20  
21  
22  
23  
24  
25  
26  
27  
28  
29  
30  
31  
32  
33  
34  
35  
36  
37  
38  
39  
40  
41  
42

### 43 **Incidence rates of Type 2 diabetes**

44  
45 Supplementary Table S3 shows the incidence of Type 2 diabetes in total and in the development and  
46 validation datasets. The total incidence of Type 2 diabetes was 32.1 (95% CI 31.6-32.7) per 1,000  
47 person-years (py): 31.8 (95% CI 31.2-32.5) in the development and 32.9 (95% CI 31.8-33.9) in the  
48 validation dataset. The largest rate difference between the development and validation datasets was  
49 for patients with a history of learning disability; the rate was 30.0 (95% CI 21.1-42.7) per 1,000 py in  
50 the development dataset compared with 41.2 (95% CI 27.6-61.5) in the validation dataset.  
51  
52  
53  
54  
55  
56  
57  
58  
59  
60

### Predictor variables

Variables missing for more than 33.3% of the study cohort were eliminated as potential predictor variables including waist circumference (missing for 99.3% of patients), liver function test (99.2% missing), pulse rate (86.5% missing), BMI (73.6% missing), and deprivation (41.1% missing).

For flexible parametric modelling, three degrees of freedom were selected for the restricted cubic spline function used for the baseline hazard (AIC= 81,482, BIC= 81,520). This places two knots at percentile positions 33 and 67 of the distribution of the uncensored log survival times. Linear was the best fit for all continuous potential predictor variables; no fractional polynomial transformations were selected. Imputation did not significantly alter the distribution of cholesterol, blood pressure, and ethnicity (Supplementary Table S4).

The following potential predictor variables were removed during the backwards selection process: atypical antipsychotics, cholesterol, history of a learning disability, a history of depression, a history of schizophrenia or bipolar affective disorder, and ethnicity. The final male model comprised 14 predictor variables including HbA1c, systolic blood pressure, diastolic blood pressure, age, smoking, alcohol use; prescribed medications: antihypertensives, aspirin, corticosteroids, statins; and medical history of: cardiovascular disease, renal/kidney disease, sleep apnoea; and family history of diabetes (Table 3). The female model included two additional predictors, medical history of polycystic ovarian syndrome and gestational diabetes (Table 3).



**Table 3.** Development and final coefficients for the male and female prognostic models.

| Predictor                       | Male              |           |           |         |             | Female            |           |           |             |             |
|---------------------------------|-------------------|-----------|-----------|---------|-------------|-------------------|-----------|-----------|-------------|-------------|
|                                 | Development model |           |           |         | Final model | Development model |           |           |             | Final model |
|                                 | Coefficient       | 95% CI    |           | p value | Coefficient | Coefficient       | 95% CI    | p value   | Coefficient |             |
| HbA1c (mmol/mol)                | 0.35048           | 0.33231   | 0.36866   | 0.000   | 0.34124     | 0.38494           | 0.36673   | 0.40315   | 0.000       | 0.38255     |
| Age                             | -0.00310          | -0.00579  | -0.00040  | 0.024   | -0.00302    | -0.00465          | -0.00737  | -0.00193  | 0.001       | -0.00462    |
| Current alcohol user            | 0.05866           | -0.00659  | 0.12391   | 0.078   | 0.05711     | 0.03588           | -0.03874  | 0.11050   | 0.346       | 0.03566     |
| Current smoker                  | -0.13053          | -0.21393  | -0.04714  | 0.002   | -0.12709    | -0.11355          | -0.20407  | -0.02302  | 0.014       | -0.11284    |
| Antihypertensive                | 0.13787           | -0.03490  | 0.31064   | 0.118   | 0.13423     | 0.23830           | -0.01509  | 0.49169   | 0.065       | 0.23682     |
| Aspirin                         | 0.10917           | 0.04131   | 0.17703   | 0.002   | 0.10629     | 0.13078           | 0.06142   | 0.20015   | 0.000       | 0.12997     |
| Corticosteroids                 | 0.13683           | 0.07441   | 0.19926   | 0.000   | 0.13322     | 0.12593           | 0.05951   | 0.19234   | 0.000       | 0.12515     |
| Statins                         | 0.65113           | 0.58046   | 0.72180   | 0.000   | 0.63396     | 0.66886           | 0.60170   | 0.73603   | 0.000       | 0.66471     |
| Cardiovascular disease          | -0.08578          | -0.16955  | -0.00201  | 0.045   | -0.08352    | -0.11919          | -0.22249  | -0.01590  | 0.024       | -0.11845    |
| Diabetes in family              | 0.65379           | 0.10842   | 1.19917   | 0.019   | 0.63655     | 0.37641           | -0.31827  | 1.07110   | 0.288       | 0.37408     |
| Polycystic ovarian syndrome     | -                 | -         | -         | -       | -           | 0.22766           | -0.08223  | 0.53755   | 0.150       | 0.22625     |
| Gestational diabetes            | -                 | -         | -         | -       | -           | 0.49865           | 0.24068   | 0.75661   | 0.000       | 0.49555     |
| Renal/kidney disease            | -0.05138          | -0.15758  | 0.05481   | 0.343   | -0.05003    | -0.13741          | -0.23253  | -0.04229  | 0.005       | -0.13655    |
| Sleep apnoea                    | 0.08901           | -0.09730  | 0.27532   | 0.349   | 0.08666     | 0.35832           | 0.04615   | 0.67048   | 0.024       | 0.35609     |
| Systolic blood pressure (mmHg)  | 0.00594           | 0.00383   | 0.00805   | 0.000   | 0.00578     | 0.00599           | 0.00347   | 0.00852   | 0.000       | 0.00596     |
| Diastolic blood pressure (mmHg) | 0.00359           | 0.00009   | 0.00708   | 0.044   | 0.00349     | 0.00053           | -0.00333  | 0.00439   | 0.784       | 0.00053     |
| Restricted cubic spline 1       | 0.96661           | 0.94161   | 0.99160   | 0.000   | 0.96661     | 0.93046           | 0.90612   | 0.95481   | 0.000       | 0.93046     |
| Restricted cubic spline 2       | -0.03565          | -0.05114  | -0.02016  | 0.000   | -0.03565    | -0.02957          | -0.04468  | -0.01445  | 0.000       | -0.02957    |
| Restricted cubic spline 3       | 0.03708           | 0.02516   | 0.04901   | 0.000   | 0.03708     | 0.01933           | 0.00740   | 0.03127   | 0.002       | 0.01933     |
| Constant                        | -19.55409         | -20.40687 | -18.70131 | 0.000   | -19.55409   | -20.84774         | -21.70300 | -19.99247 | 0.000       | -20.84774   |

Final model coefficients include adjustment for over-fitting.

### Calibration

Using the developed model, Supplementary Figure S3 shows an example of the calibration between expected and observed probabilities of developing Type 2 diabetes at 10 years of follow up within one of the imputed female and male validation datasets. There were slight differences between plots from the different imputed datasets due to the different values imputed for predictors. Using Rubin's rules to combine the results across imputed datasets, the calibration slope was 0.974 (95% CI 0.905-1.042) for males and 0.994 (95% CI 0.931-1.057) for females. This indicates that the developed models were slightly overfitted. A uniform shrinkage factor ( $S=0.974$  for males and  $S=0.994$  for females) was applied to each developed model's beta coefficients before recalibrating the baseline function of the final model.

### Discrimination

There was relatively good separation, or discrimination, between risk groups for both males and females when the developed models were fitted using the validation dataset. Supplementary Figure S4 shows an example using one of the imputed validation datasets. There were slight differences between plots from the different imputed datasets due to the different values imputed for predictors. For both males and females, the log-rank test for all imputed datasets indicated that the survivor functions were different between risk groups ( $p<0.001$  for both males and females). Furthermore, validation showed that the male model discriminated reasonably well with mean Harrell's C statistic across imputed datasets of 0.701 and Somers' D statistic of 0.402; for the female model, the corresponding statistics were 0.718 and 0.436 (Table 4). These values suggest slightly better discrimination for the female model.

**Table 4.** Male and female prognostic model mean performance statistics across imputed datasets.

| Measure           | Male        |            | Female      |            |
|-------------------|-------------|------------|-------------|------------|
|                   | Development | Validation | Development | Validation |
| Harrell's C       | 0.700       | 0.701      | 0.720       | 0.718      |
| Somers' D         | 0.401       | 0.402      | 0.441       | 0.436      |
| Calibration slope | 1.000       | 0.974      | 1.000       | 0.994      |

For peer review only

## DISCUSSION

Although several prognostic and diagnostic models for predicting Type 2 diabetes-related outcomes have been developed and validated within the UK, none to date has been specifically developed in a population with NDH, for whom the risk profile is likely different than the general population. The available evidence shows that the incidence of Type 2 diabetes in the cohort of patients used to develop the QDiabetes-2018 risk assessment tool was 4.17 (95% CI 4.15 to 4.19) per 1,000 person-years (17). Those included in our study were significantly more likely to develop Type 2 diabetes. In fact, the incidence in our development cohort was nearly eight times that of the QDiabetes-2018 development cohort. Therefore, we have developed and validated pragmatic sex-specific prognostic models for predicting the risk of developing Type 2 diabetes in those with NDH, which could be used for targeting referral to the NHS DPP. Our models include important risk factors for people that already have NDH.

Since the primary aim of this study was to develop models that could be easily implemented using routinely collected data, in the variable selection process we closely considered data availability and excluded variables with high levels of missing data, including waist circumference, liver function, pulse rate, BMI, and deprivation. Waist circumference and BMI are key risk factors for Type 2 diabetes, but these measures may not be obtained due to lack of time and other practical or perceived barriers (25). BMI, in particular, has been included in many existing Type 2 diabetes models (10). However, the inclusion of BMI must be balanced with practicality, given that our data showed BMI (or height and weight) were infrequently recorded in a primary care setting.

Since the models were developed using observational primary care data, the accuracy of coding, particularly of the outcome, has the potential to affect model development. Research published in 2011 found that miscoding, misdiagnosis, and misclassification of diabetes was common in UK primary care (26). However, in more recent years, implementation of the UK Quality and Outcomes Framework

1  
2  
3 (QoF) has resulted in better coding of Type 2 diabetes, specifically within CPRD (27, 28). With improved  
4 interoperability, the launch of SNOMED is expected to further boost coding accuracy (29). Since this  
5 research utilised data initially recorded for managing the care of individual patients, there are also a  
6 number of potential sources of bias. To address this, the study cohort included only patients that are  
7 considered by CPRD of acceptable research standards. Further, clinical measures that were not  
8 biologically plausible and likely misreported were excluded. In most cases, another value that was  
9 biologically plausible was available within the same period for the patient.  
10  
11  
12  
13  
14  
15  
16  
17  
18  
19  
20

21 This study has several strengths. These models are for use in primary care. Therefore, we used a  
22 primary care database (CPRD) to develop the models. In recent years the HbA1c assay has been the  
23 preferred method to diagnose NDH and Type 2 diabetes compared with oral glucose tolerance or  
24 fasting plasma glucose tests (30). Therefore, these models were developed using HbA1c to quantify  
25 blood glucose. The large sample size allowed for a sufficient number of events per predictor  
26 parameter. We considered a range of predictors specifically selected due to clinical relevance to  
27 development of Type 2 diabetes. Continuous predictors were not categorised, so there was no loss of  
28 information. The decision to develop sex-specific models was based on the presence of some sex-  
29 specific risk factors, like history of gestational diabetes. Additionally, we identified new risk factors  
30 not included in the 2018 update of QDiabetes, which was developed within the general population  
31 (17). These risk factors include history of sleep apnoea, blood pressure, alcohol use, prescription of  
32 antihypertensives, and prescription of aspirin.  
33  
34  
35  
36  
37  
38  
39  
40  
41  
42  
43  
44  
45  
46  
47  
48  
49

50 This study also had several limitations. The primary limitation is the splitting of the cohort into  
51 development and validation datasets instead of using a fully external database to validate the model.  
52 However, given the size of the cohort and the large number of events, this likely had little effect on  
53 model development. Furthermore, to ensure case mix, non-random selection was used to split the  
54 cohort. The outcome for this study was defined using a single medcode or test result indicating Type  
55  
56  
57  
58  
59  
60

1  
2  
3 2 diabetes. In practice, this would typically be confirmed via a follow up test. Another limitation is that  
4  
5 the models included predictor variables obtained at one point in time including a single HbA1c  
6  
7 measure to determine NDH. However, the models could be adjusted to include time-varying  
8  
9 predictors relatively easily. Methods such as land marking or joint models could be used to model  
10  
11 changes in predictors over time. Some predictor variables were self-reported including smoking,  
12  
13 alcohol use, and family history of diabetes. The proportion of non-current smokers is in line with a  
14  
15 similar study while the proportion of patients with a family history of diabetes in this study was much  
16  
17 lower than that reported in a similar study.<sup>(17)</sup> This may indicate that family history of diabetes is not  
18  
19 established in clinical practice or established but not recorded within the CPRD. Prescriptions issued  
20  
21 were used as a proxy for current medication. Patients may not have filled the prescription or adhered  
22  
23 to the medication. Because this was an open cohort and the number of people diagnosed with NDH  
24  
25 has increased in recent years, the mean follow-up time was short- 2.7 years for patients in the  
26  
27 development dataset and 2.5 years for patients in the validation dataset. However, 14,896 patients in  
28  
29 the development dataset and 5,678 patients in the validation dataset had five or more years of follow  
30  
31 up. Therefore, based on existing research, we believe that there was sufficient follow-up time to  
32  
33 determine risk for progression to Type 2 diabetes. HES and ONS linkage was only available for 59.0%  
34  
35 of patients in the cohort. If linkage to ONS was not available and a date of death was provided in CPRD,  
36  
37 then the CPRD date was used. While ONS is the gold standard for date of death, deaths are less well  
38  
39 coded in CPRD. It is possible that deaths for some patients without linkage to ONS were never coded  
40  
41 in CPRD, and the patients were not censored accordingly. However, this likely only affected a few  
42  
43 patients. It is possible that patients receiving non-metformin oral hypoglycaemic agents at baseline  
44  
45 were included in the cohort. However, it is highly unlikely that a patient would have been prescribed  
46  
47 a non-metformin oral hypoglycaemic agent without meeting any of the other exclusion criteria.  
48  
49 Finally, there may have been additional predictor variables that were not considered either because  
50  
51 they are not collected as part of routine clinical care or because they are not among the known  
52  
53 traditional risk factors for Type 2 diabetes.  
54  
55  
56  
57  
58  
59  
60

1  
2  
3  
4  
5 Similar to the QRISK cardiovascular disease risk algorithm, the models presented are designed to be  
6 integrated into primary care computer systems to automatically calculate risk (31). At the time of the  
7 first HbA1c test indicating NDH, a risk score could be automatically generated using the HbA1c  
8 measure along with clinical, prescription, and diagnoses data already contained in the individual's  
9 electronic health record. Additionally, the algorithm for imputing missing data could also be  
10 implemented automatically. Rather than referring all adults with NDH to the NHS DPP, healthcare  
11 providers could prioritize referrals for people at high risk for progressing to Type 2 diabetes.  
12  
13  
14  
15  
16  
17  
18  
19  
20  
21  
22

23 The NHS DPP is a limited resource and does not have current capacity to accommodate all adults with  
24 NDH in England. People are referred to the NHS DPP through the NHS Health Check programme, aimed  
25 at people aged 40-74, or people with NDH identified through opportunistic assessment or as part of  
26 routine clinical care (9). Eligibility for the NHS DPP is typically determined through an HbA1c measure  
27 or, less frequently, an Oral Glucose Tolerance Test (OGTT). However, this study has identified  
28 additional factors to stratify further the risk of developing Type 2 diabetes within this high-risk group.  
29 Targeting referrals may be a more cost-effective and efficient way to deliver the NHS DPP. The male  
30 and female prognostic models we developed and validated could be used to identify and target those  
31 most at risk of developing Type 2 diabetes for referral to the NHS DPP. Implementation of these  
32 models would standardise the NHS DPP identification and referral process to be consistent across sites  
33 and based on information already collected as part of primary care. The next step is to determine the  
34 optimum risk threshold to accurately identify patients that will develop Type 2 diabetes.  
35  
36  
37  
38  
39  
40  
41  
42  
43  
44  
45  
46  
47  
48  
49  
50  
51  
52  
53  
54  
55  
56  
57  
58  
59  
60

## Footnotes

### CRedit Author Statement

Conceptualization: LJG, FZ, MJD, KK; funding acquisition: LJG (lead), MJD, FZ; methodology, writing – original draft: BC, LJG; data curation, formal analysis, validation, visualization: BC; software: BC, SB; writing – review & editing: FZ, MJD, KK, SB. All authors provided final approval of the version to publish. The corresponding author (BC) had full access to all the data in the study and had final responsibility for the decision to submit it for publication.

### Competing interests

BC, LJG, FZ, and SB: none

MJD has acted as consultant, advisory board member and speaker for Novo Nordisk, Sanofi-Aventis, Lilly, Merck Sharp & Dohme, Boehringer Ingelheim, AstraZeneca and Janssen, an advisory board member for Servier and as a speaker for Mitsubishi Tanabe Pharma Corporation and Takeda Pharmaceuticals International Inc. She has received grants in support of investigator and investigator initiated trials from Novo Nordisk, Sanofi-Aventis, Lilly, Boehringer Ingelheim and Janssen. She was a member of the NICE public health guideline for prevention of Type 2 diabetes (NICE PH 38).

KK has acted as a consultant and speaker for Novartis, Novo Nordisk, Sanofi-Aventis, Lilly and Merck Sharp & Dohme. He has received grants in support of investigator and investigator-initiated trials from Novartis, Novo Nordisk, Sanofi-Aventis, Lilly, Pfizer, Boehringer Ingelheim and Merck Sharp & Dohme. He is a member of the External Reference Group of the NHS DPP and was Chair of the NICE public health guideline for prevention of Type 2 diabetes (NICE PH 38).

### Acknowledgements

This study is based on data from the Clinical Practice Research Datalink GOLD database obtained under licence from the UK Medicines and Healthcare products Regulatory Agency. However, the interpretation and conclusions contained in this article are those of the authors alone.

The authors gratefully acknowledge Leicester Real-World Evidence Unit (LRWE) for facilitating the download of CPRD data. LRWE is funded by University of Leicester, National Institute for Health Research (NIHR) Applied Research Collaboration East Midlands (ARC EM) and NIHR Leicester Biomedical Research Centre. The interpretation and conclusions contained in this report/article do not necessarily reflect those of the LRWE.

### Funding

This research was supported by a grant from National Institute for Health Research (NIHR) Collaboration for Leadership in Applied Health Research and Care (CLAHRC) East Midlands. The funding body had no role in the study design, data collection, analysis, or interpretation; in the writing of the manuscript; or in the decision to submit the manuscript.



1  
2  
3  
4 This research was also funded in part by the NIHR Leicester Biomedical Research Centre and NIHR  
5 Applied Research Collaboration. The views expressed are those of the author(s) and not necessarily  
6 those of the NHS, the NIHR or the Department of Health and Social Care.  
7  
8  
9

### 10 **Ethical approval**

11  
12 This research was approved by the Independent Scientific Advisory Committee (ISAC) for Medicines  
13 and Healthcare products Regulatory Agency Database Research (protocol 18\_238).  
14  
15  
16

### 17 **Data sharing**

18  
19 Patient-level electronic health records obtained from CPRD cannot be shared. However, the authors  
20 will share programming code and aggregate statistics if requested. A list of medcodes used to define  
21 Type 2 diabetes, pre-existing Type 1 diabetes, and medical and family history as well as product codes  
22 used to identify current medication is available at <https://github.com/bc188/Prognostic-model-codes>.  
23  
24  
25  
26  
27  
28  
29  
30  
31  
32  
33  
34  
35  
36  
37  
38  
39  
40  
41  
42  
43  
44  
45  
46  
47  
48  
49  
50  
51  
52  
53  
54  
55  
56  
57  
58  
59  
60

## REFERENCES

1. Barron E, Valabhji J, Young B. Prevalence, characteristics, distribution and identification of non-diabetic hyperglycaemia in England, 2016. Available from <https://www.gov.uk/government/news/five-million-people-at-high-risk-of-type-2-diabetes>. Accessed 20 Sept 2019
2. Gillies CL, Abrams KR, Lambert PC, Cooper NJ, Sutton AJ, Hsu RT, Khunti K. Pharmacological and lifestyle interventions to prevent or delay type 2 diabetes in people with impaired glucose tolerance: systematic review and meta-analysis. *BMJ* 2007;334:299
3. Kramer MK, Miller RG, Siminerio LM Evaluation of a community Diabetes Prevention Program delivered by diabetes educators in the United States: One-year follow up. *Diabetes Res Clin Pr* 2014;106(3):E49-E52.
4. Knowler WC B-CE, Fowler SE, et al. Reduction in the incidence of type 2 diabetes with lifestyle intervention or metformin. *N Engl J Med* 2002; 346:393-403
5. Tuomilehto J, Lindström J, Eriksson JG, Valle TT, Hämäläinen H, Ilanne-Parikka P, Keinänen-Kiukaanniemi S, Laakso M, Louheranta A, Rastas M, Salminen V, Uusitupa M. Prevention of Type 2 Diabetes Mellitus by Changes in Lifestyle among Subjects with Impaired Glucose Tolerance. *N Engl J Med* 2001; 344:1343-1350
6. Pan XR, Li GW, Hu YH, Wang JX, Yang WY, An ZX, Hu ZX, Lin J, Xiao JZ, Cao HB, Liu PA, Jiang XG, Jiang YY, Wang JP, Zheng H, Zhang H, Bennett PH, Howard BV. Effects of diet and exercise in preventing NIDDM in people with impaired glucose tolerance: the Da Qing IGT and Diabetes Study. *Diabetes Care* 1997; 20:537-544
7. Troughton J, Chatterjee S, Hill SE, Daly H, Martin Stacey L, Stone MA, Patel N, Khunti K, Yates T, Gray LJ, Davies MJ. Development of a lifestyle intervention using the MRC framework for diabetes prevention in people with impaired glucose regulation. *J Public Health (Oxf)* 38: 493-501
8. England NHS. Roll out of the Programme, 2016. Available from <https://www.england.nhs.uk/diabetes/diabetes-prevention/roll-out-of-the-programme>. Accessed 20 Sept 2019
9. England NHS. NHSDPP overview and FAQ, 2016. Available from <https://www.england.nhs.uk/wp-content/uploads/2016/08/dpp-faq.pdf>. Accessed 20 Sept 2019
10. Collins GS, Mallett S, Omar O, Yu L. Developing risk prediction models for type 2 diabetes: a systematic review of methodology and reporting. *BMC Med* 2011;9:103
11. Noble D, Mathur R, Dent T, Meads C, Greenhalgh T. Risk models and scores for type 2 diabetes: systematic review. *BMJ* 2011;343(d7163).
12. Barber SR, Davies MJ, Khunti K, Gray LJ. Risk assessment tools for detecting those with pre-diabetes: a systematic review. *Diabetes Res Clin Pract* 2014;105:1-13
13. Bodicoat DH, Khunti K, Srinivasan BT, Mostafa S, Gray LJ, Davies MJ, Webb DR. Incident Type 2 diabetes and the effect of early regression to normoglycaemia in a population with impaired glucose regulation. *Diabet Med* 2017;34:396-404
14. Twohig H, Hodges V, Mitchell C. Pre-diabetes: opportunity or overdiagnosis?. *Br J Gen Pract.* 2018;68(669):172-173.
15. Herrett E, Gallagher AM, Bhaskaran K, Forbes H, Mathur R, van Staa T, Smeeth L. Data resource profile: clinical practice research datalink (CPRD). *Int J Epidemiol* 2015;44:827-36
16. Riley RD, Snell KI, Ensor J, Burke DL, Harrell Jr FE, Moons KG, Collins GS. Minimum sample size for developing a multivariable prediction model: PART II-binary and time-to-event outcomes. *Stat Med* 2019;38:1276-96
17. Hippisley-Cox J, Coupland C. Development and validation of QDiabetes-2018 risk prediction algorithm to estimate future risk of type 2 diabetes: cohort study. *BMJ* 2017;359:j5019
18. Gray LJ, Taub N, Khunti K, Gardiner E, Hiles S, Webb DR, Srinivasan BT, Davies MJ. The Leicester Risk Assessment score for detecting undiagnosed Type 2 diabetes and impaired glucose regulation for use in a multiethnic UK setting. *Diabet Med* 2010;27:887-95
19. Van der Heijden GJ, Donders ART, Stijnen T, Moons KG. Imputation of missing values is superior to complete case analysis and the missing-indicator method in multivariable diagnostic research: a clinical example. *J Clin Epidemiol* 2006;59:1102-9
20. Royston P, Lambert PC. Flexible parametric survival analysis using Stata: beyond the Cox model. *Stat Med* 2014;33:5280-97
21. Dunkler D, Plischke M, Leffondré K, Heinze G. Augmented backward elimination: a pragmatic and purposeful way to develop statistical models. *PLoS One* 2014;9:e113677

- 1
  - 2
  - 3
  - 4
  - 5
  - 6
  - 7
  - 8
  - 9
  - 10
  - 11
  - 12
  - 13
  - 14
  - 15
  - 16
  - 17
  - 18
  - 19
  - 20
  - 21
  - 22
  - 23
  - 24
  - 25
  - 26
  - 27
  - 28
  - 29
  - 30
  - 31
  - 32
  - 33
  - 34
  - 35
  - 36
  - 37
  - 38
  - 39
  - 40
  - 41
  - 42
  - 43
  - 44
  - 45
  - 46
  - 47
  - 48
  - 49
  - 50
  - 51
  - 52
  - 53
  - 54
  - 55
  - 56
  - 57
  - 58
  - 59
  - 60
22. Harrell FE, Califf RM, Pryor DB, Lee KL, Rosati RA. Evaluating the yield of medical tests. *JAMA* 1982;247:2543-6
23. Harrell FE, Lee KL, Mark DB. Multivariable prognostic models: Issues in developing models, evaluating assumptions and adequacy, and measuring and reducing errors. *Stat Med* 1996;15:361-87
24. Snee R. Validation of Regression Models: Methods and Examples. *Technometrics* 1977;19:419-28
25. Dunkley AJ, Stone MA, Patel N, Davies MJ, Khunti K. Waist circumference measurement: knowledge, attitudes and barriers in patients and practitioners in a multi-ethnic population. *Fam Pract* 2009;26:365-71
26. De Lusignan S, Sadek N, Mulnier H, Tahir A, Russell-Jones D, Khunti K. Miscoding, misclassification and misdiagnosis of diabetes in primary care. *Diabet Med* 2012;29:181-9
27. Calvert M, Shankar A, McManus RJ, Lester H, Freemantle N. Effect of the quality and outcomes framework on diabetes care in the United Kingdom: retrospective cohort study. *BMJ* 2009;338:b1870
28. Tate AR, Dungey S, Glew S, Beloff N, Williams R, Williams T. Quality of recording of diabetes in the UK: how does the GP's method of coding clinical data affect incidence estimates? Cross-sectional study using the CPRD database. *BMJ open* 2017;7:e012905
29. Haarbrandt B, Schreiweis B, Rey S, Sax U, Scheithauer S, Rienhoff O, Knaup-Gregori P, Bavendiek U, Dieterich C, Brors B, Kraus I, Thoms CM, Jäger D, Ellenrieder V, Bergh B, Yahyapour R, Eils R, Consortium H, Marschollek M. HiGHmed - An Open Platform Approach to Enhance Care and Research across Institutional Boundaries. *Methods Inf Med* 2018;57:e66-e81
30. International Expert Committee. International Expert Committee report on the role of the A1C assay in the diagnosis of diabetes. *Diabetes Care* 2009;32:1327-34
31. Hippisley-Cox J, Coupland C, Brindle P. Development and validation of QRISK3 risk prediction algorithms to estimate future risk of cardiovascular disease: prospective cohort study. *BMJ*. 2017;357:j2099

**Supplementary Table S1.** Number of practices by region in total and included in the development and validation datasets.

| Practice region        | Total      | Dataset     |            |
|------------------------|------------|-------------|------------|
|                        |            | Development | Validation |
| North East             | 11         | 8           | 3          |
| North West             | 85         | 60          | 26         |
| Yorkshire & The Humber | 28         | 20          | 8          |
| East Midlands          | 25         | 18          | 8          |
| West Midlands          | 61         | 43          | 18         |
| East of England        | 54         | 38          | 16         |
| South West             | 61         | 43          | 18         |
| South Central          | 56         | 39          | 17         |
| London                 | 95         | 67          | 29         |
| South East Coast       | 68         | 48          | 20         |
| Northern Ireland       | 25         | 18          | 8          |
| Scotland               | 94         | 66          | 28         |
| Wales                  | 77         | 54          | 23         |
| <b>Total</b>           | <b>740</b> | <b>518</b>  | <b>222</b> |

**Supplementary Table S2.** Percent of patients missing potential predictor variables.

| Predictor variable               | Missing |      |
|----------------------------------|---------|------|
|                                  | n       | %    |
| Waist circumference              | 153,592 | 99.3 |
| Liver function test              | 153,493 | 99.2 |
| Pulse rate                       | 133,890 | 86.5 |
| BMI                              | 113,840 | 73.6 |
| Index of Multiple Deprivation    | 63,524  | 41.1 |
| Systolic blood pressure          | 48,390  | 31.3 |
| Diastolic blood pressure         | 48,390  | 31.3 |
| Ethnicity                        | 41,121  | 26.6 |
| Serum cholesterol                | 38,910  | 25.2 |
| HbA1c                            | 0       | 0    |
| Age                              | 0       | 0    |
| Sex                              | 0       | 0    |
| Current alcohol use              | 0       | 0    |
| Current smoker                   | 0       | 0    |
| Antihypertensives                | 0       | 0    |
| Atypical antipsychotics          | 0       | 0    |
| Aspirin                          | 0       | 0    |
| Corticosteroids                  | 0       | 0    |
| Statins                          | 0       | 0    |
| Bipolar disease or schizophrenia | 0       | 0    |
| Cardiovascular disease           | 0       | 0    |
| Depression                       | 0       | 0    |
| Learning disability              | 0       | 0    |
| Diabetes in family               | 0       | 0    |
| Polycystic ovarian syndrome      | 0       | 0    |
| Gestational diabetes             | 0       | 0    |
| Renal/kidney disease             | 0       | 0    |
| Sleep apnoea                     | 0       | 0    |

Supplementary Table S3. Incidence of Type 2 diabetes per 1,000 person years with 95% confidence intervals.

|                         |           | Total     |        |                  | Dataset     |       |                  |            |       |                  |
|-------------------------|-----------|-----------|--------|------------------|-------------|-------|------------------|------------|-------|------------------|
|                         |           |           |        |                  | Development |       |                  | Validation |       |                  |
|                         |           | Py        | n      | Rate (95% CI)    | Py          | n     | Rate (95% CI)    | Py         | n     | Rate (95% CI)    |
| Total                   |           | 408,350.5 | 13,115 | 32.1 (31.6-32.7) | 293,237.8   | 9,332 | 31.8 (31.2-32.5) | 115,112.6  | 3,783 | 32.9 (31.8-33.9) |
| Age group               | <30       | 4,285.1   | 79     | 18.4 (14.8-23.0) | 3,017.0     | 56    | 18.6 (14.3-24.1) | 1,268.1    | 23    | 18.1 (12.1-27.3) |
|                         | 30-39     | 15,214.7  | 307    | 20.2 (18.0-22.6) | 11,050.8    | 231   | 20.9 (18.4-23.8) | 4,164.0    | 76    | 18.3 (14.6-22.9) |
|                         | 40-49     | 43,354.3  | 1,157  | 26.7 (25.2-28.3) | 31,539.3    | 836   | 26.5 (24.8-28.4) | 11,815.0   | 321   | 27.2 (24.4-30.3) |
|                         | 50-59     | 81,437.4  | 2,399  | 29.5 (28.3-30.7) | 58,691.3    | 1,730 | 29.5 (28.1-30.9) | 22,746.1   | 669   | 29.4 (27.3-31.7) |
|                         | 60-69     | 109,599.6 | 3,808  | 34.7 (33.7-35.9) | 79,177.3    | 2,709 | 34.2 (32.9-35.5) | 30,422.4   | 1,099 | 36.1 (34.1-38.3) |
|                         | 70-79     | 96,100.4  | 3,553  | 37.0 (35.8-38.2) | 68,493.3    | 2,527 | 36.9 (35.5-38.4) | 27,607.1   | 1,026 | 37.2 (35.0-39.5) |
|                         | 80-89     | 50,818.9  | 1,629  | 32.1 (30.5-33.7) | 36,072.2    | 1,114 | 30.9 (29.1-32.8) | 14,746.7   | 515   | 34.9 (32.0-38.1) |
|                         | 90+       | 7,540.0   | 183    | 24.3 (21.0-28.1) | 5,196.7     | 129   | 24.8 (20.9-29.5) | 2,343.2    | 54    | 23.0 (17.6-30.1) |
| Sex                     | Male      | 186,953.5 | 6,612  | 35.4 (34.5-36.2) | 134,390.2   | 4,719 | 35.1 (34.1-36.1) | 52,563.3   | 1,893 | 36.0 (34.4-37.7) |
|                         | Female    | 221,397.0 | 6,503  | 29.4 (28.7-30.1) | 158,847.6   | 4,613 | 29.0 (28.2-29.9) | 62,549.3   | 1,890 | 30.2 (28.9-31.6) |
| Ethnicity               | Non-white | 38,606.0  | 1,154  | 29.9 (28.2-31.7) | 29,281.3    | 863   | 29.5 (27.6-31.5) | 9,324.7    | 291   | 31.2 (27.8-35.0) |
|                         | White     | 257,231.3 | 8,446  | 32.8 (32.1-33.5) | 181,622.3   | 5,878 | 32.4 (31.5-33.2) | 75,609.0   | 2,568 | 34.0 (32.7-35.3) |
| Current alcohol user    | No        | 321,672.8 | 10,049 | 31.2 (30.6-31.9) | 231,489.6   | 7,223 | 31.2 (30.5-31.9) | 90,183.2   | 2,826 | 31.3 (30.2-32.5) |
|                         | Yes       | 86,677.6  | 3,066  | 35.4 (34.1-36.6) | 61,748.2    | 2,109 | 34.2 (32.7-35.6) | 24,929.4   | 957   | 38.4 (36.0-40.9) |
| Current smoker          | No        | 351,866.5 | 11,355 | 32.3 (31.7-32.9) | 252,907.8   | 8,103 | 32.0 (31.3-32.7) | 98,958.7   | 3,252 | 32.9 (31.8-34.0) |
|                         | Yes       | 56,483.9  | 1,760  | 31.2 (29.7-32.6) | 40,330.0    | 1,229 | 30.5 (28.8-32.2) | 16,154.0   | 531   | 32.9 (30.2-35.8) |
| Antihypertensives       | No        | 402,244.5 | 12,840 | 31.9 (31.4-32.5) | 288,800.1   | 9,137 | 31.6 (31.0-32.3) | 113,444.4  | 3,703 | 32.6 (31.6-33.7) |
|                         | Yes       | 6,105.9   | 275    | 45.0 (40.0-50.7) | 4,437.7     | 195   | 43.9 (38.2-50.6) | 1,668.3    | 80    | 48.0 (38.5-59.7) |
| Atypical antipsychotics | No        | 397,003.1 | 12,760 | 32.1 (31.6-32.7) | 284,987.3   | 9,084 | 31.9 (31.2-32.5) | 112,015.8  | 3,676 | 32.8 (31.8-33.9) |
|                         | Yes       | 11,347.4  | 355    | 31.3 (28.2-34.7) | 8,250.5     | 248   | 30.1 (26.5-34.0) | 3,096.9    | 107   | 34.6 (28.6-41.8) |
| Aspirin                 | No        | 282,265.5 | 7,971  | 28.2 (27.6-28.9) | 202,397.8   | 5,686 | 28.1 (27.4-28.8) | 79,867.7   | 2,285 | 28.6 (27.5-29.8) |
|                         | Yes       | 126,085.0 | 5,144  | 40.8 (39.7-41.9) | 90,840.0    | 3,646 | 40.1 (38.9-41.5) | 35,245.0   | 1,498 | 42.5 (40.4-44.7) |
| Corticosteroids         | No        | 132,237.8 | 3,781  | 28.6 (27.7-29.5) | 94,557.1    | 2,721 | 28.8 (27.7-29.9) | 37,680.7   | 1,060 | 28.1 (26.5-29.9) |
|                         | Yes       | 276,112.7 | 9,334  | 33.8 (33.1-34.5) | 198,680.8   | 6,611 | 33.3 (32.5-34.1) | 77,431.9   | 2,723 | 35.2 (33.9-36.5) |
| Statins                 | No        | 197,618.7 | 4,184  | 21.2 (20.5-21.8) | 141,932.3   | 2,977 | 21.0 (20.2-21.7) | 55,686.3   | 1,207 | 21.7 (20.5-22.9) |
|                         | Yes       | 210,731.8 | 8,931  | 42.4 (41.5-43.3) | 151,305.5   | 6,355 | 42.0 (41.0-43.0) | 59,426.3   | 2,576 | 43.3 (41.7-45.1) |
| Schizophrenia/bipolar   | No        | 402,889.4 | 12,937 | 32.1 (31.6-32.7) | 289,246.4   | 9,212 | 31.8 (31.2-32.5) | 113,642.9  | 3,725 | 32.8 (31.7-33.8) |
|                         | Yes       | 5,461.1   | 178    | 32.6 (28.1-37.8) | 3,991.4     | 120   | 30.1 (25.1-36.0) | 1,469.7    | 58    | 39.5 (30.5-51.0) |
| Cardiovascular disease  | No        | 361,574.5 | 11,297 | 31.2 (30.7-31.8) | 260,237.0   | 8,074 | 31.0 (30.4-31.7) | 101,337.5  | 3,223 | 31.8 (30.7-32.9) |
|                         | Yes       | 46,776.0  | 1,818  | 38.9 (37.1-40.7) | 33,000.8    | 1,258 | 38.1 (36.1-40.3) | 13,775.1   | 560   | 40.7 (37.4-44.2) |
| Depression              | No        | 303,786.2 | 9,875  | 32.5 (31.9-33.2) | 219,040.2   | 7,043 | 32.2 (31.4-32.9) | 84,746.0   | 2,832 | 33.4 (32.2-34.7) |

|                       |         |           |        |                    |           |       |                    |           |       |                   |
|-----------------------|---------|-----------|--------|--------------------|-----------|-------|--------------------|-----------|-------|-------------------|
|                       | Yes     | 104,564.3 | 3,240  | 31.0 (29.9-32.1)   | 74,197.7  | 2,289 | 30.9 (29.6-32.1)   | 30,366.6  | 951   | 31.3 (29.4-33.4)  |
| Learning disability   | No      | 406,734.9 | 13,060 | 32.1 (31.6-32.7)   | 292,204.8 | 9,301 | 31.8 (31.2-32.5)   | 114,530.1 | 3,759 | 32.8 (31.8-33.9)  |
|                       | Yes     | 1,615.6   | 55     | 34.0 (26.1-44.3)   | 1,033.0   | 31    | 30.0 (21.1-42.7)   | 582.5     | 24    | 41.2 (27.6-61.5)  |
| Diabetes in family    | No      | 407,867.0 | 13,091 | 32.1 (31.6-32.7)   | 292,821.8 | 9,311 | 31.8 (31.2-32.4)   | 115,045.1 | 3,780 | 32.9 (31.8-33.9)  |
|                       | Yes     | 483.5     | 24     | 49.6 (33.3-74.1)   | 416.0     | 21    | 50.5 (32.9-77.4)   | 67.5      | <5    | 44.4 (14.3-137.8) |
| Renal/kidney disease  | No      | 368,309.2 | 11,766 | 31.9 (31.4-32.5)   | 265,292.2 | 8,403 | 31.7 (31.0-32.4)   | 103,016.9 | 3,363 | 32.6 (31.6-33.8)  |
|                       | Yes     | 40,041.3  | 1,349  | 33.7 (31.9-35.5)   | 27,945.6  | 929   | 33.2 (31.2-35.5)   | 12,095.7  | 420   | 34.7 (31.6-38.2)  |
| Sleep apnoea          | No      | 403,300.5 | 12,896 | 32.0 (31.4-32.5)   | 289,628.0 | 9,178 | 31.7 (31.0-32.3)   | 113,672.4 | 3,718 | 32.7 (31.7-33.8)  |
|                       | Yes     | 5,050.0   | 219    | 43.4 (38.0-49.5)   | 3,609.8   | 154   | 42.7 (36.4-50.0)   | 1,440.2   | 65    | 45.1 (35.4-57.6)  |
| PCOS*                 | No      | 219,461.5 | 6,441  | 29.3 (28.6-30.1)   | 157,488.6 | 4,571 | 29.0 (28.2-29.9)   | 61,972.9  | 1,870 | 30.2 (28.8-31.6)  |
|                       | Yes     | 1,935.5   | 62     | 32.0 (25.0-41.1)   | 1,359.0   | 42    | 30.9 (22.8-41.8)   | 576.5     | 20    | 34.7 (22.4-53.8)  |
| Gestational diabetes* | No      | 219,205.1 | 6,423  | 29.3 (28.6-30.0)   | 157,163.0 | 4,550 | 29.0 (28.1-29.8)   | 62,042.1  | 1,873 | 30.2 (28.9-31.6)  |
|                       | Yes     | 2,191.9   | 80     | 36.5 (29.3-45.4)   | 1,684.7   | 63    | 37.4 (29.2-47.9)   | 507.2     | 17    | 33.5 (20.8-53.9)  |
| HbA1c (mmol/mol)      | 42      | 143,564.4 | 2,341  | 16.3 (15.7-17.0)   | 102,303.4 | 1,650 | 16.1 (15.4-16.9)   | 41,261.0  | 691   | 16.7 (15.5-18.0)  |
|                       | 43      | 103,706.7 | 2,496  | 24.1 (23.1-25.0)   | 74,289.4  | 1,762 | 23.7 (22.6-24.9)   | 29,417.3  | 734   | 25.0 (23.2-26.8)  |
|                       | 44      | 72,839.5  | 2,563  | 35.2 (33.9-36.6)   | 52,495.5  | 1,801 | 34.3 (32.8-35.9)   | 20,344.0  | 762   | 37.5 (34.9-40.2)  |
|                       | 45      | 48,523.8  | 2,407  | 49.6 (47.7-51.6)   | 35,497.9  | 1,724 | 48.6 (46.3-50.9)   | 13,025.9  | 683   | 52.4 (48.6-56.5)  |
|                       | 46      | 31,687.9  | 2,473  | 78.0 (75.0-81.2)   | 22,985.0  | 1,794 | 78.1 (74.5-81.7)   | 8,702.9   | 679   | 78.0 (72.4-84.1)  |
|                       | 47      | 8,028.2   | 835    | 104.0 (97.2-111.3) | 5,666.6   | 601   | 106.1 (97.9-114.9) | 2,361.6   | 234   | 99.1 (87.2-112.6) |
| Cholesterol (mmol/L)  | <5.0    | 130,946.3 | 4,568  | 34.9 (33.9-35.9)   | 93,611.8  | 3,273 | 35.0 (33.8-36.2)   | 37,334.5  | 1,295 | 34.7 (32.8-36.6)  |
|                       | 5.0-6.9 | 152,342.9 | 4,978  | 32.7 (31.8-33.6)   | 109,313.4 | 3,548 | 32.5 (31.4-33.5)   | 43,029.5  | 1,430 | 33.2 (31.6-35.0)  |
|                       | ≥7.0    | 24,848.2  | 817    | 32.9 (30.7-35.2)   | 17,982.7  | 573   | 31.9 (29.4-34.6)   | 6,865.5   | 244   | 35.5 (31.3-40.3)  |
| Systolic BP (mmHg)    | <140    | 147,766.9 | 4,476  | 30.3 (29.4-31.2)   | 105,813.8 | 3,195 | 30.2 (29.2-31.3)   | 41,953.1  | 1,281 | 30.5 (28.9-32.3)  |
|                       | ≥140    | 135,710.1 | 5,206  | 38.4 (37.3-39.4)   | 97,560.5  | 3,685 | 37.8 (36.6-39.0)   | 38,149.6  | 1,521 | 39.9 (37.9-41.9)  |
| Diastolic BP (mmHg)   | <90     | 228,884.2 | 7,540  | 32.9 (32.2-33.7)   | 164,236.7 | 5,367 | 32.7 (31.8-33.6)   | 64,647.6  | 2,173 | 33.6 (32.2-35.1)  |
|                       | ≥90     | 54,592.8  | 2,142  | 39.2 (37.6-40.9)   | 39,137.6  | 1,513 | 38.7 (36.8-40.7)   | 15,455.2  | 629   | 40.7 (37.6-44.0)  |

BP=blood pressure. PCOS=Polycystic ovarian syndrome.

Table includes observed values only. Imputed values for ethnicity, serum cholesterol, and systolic and diastolic blood pressure are not included.

Index of multiple deprivation, BMI, pulse, liver function test, and waist circumference are not included in the table since these measures are not available for >33.3% of the cohort.

Age was collapsed into 10-year groups. HbA1c was collapsed into one mmol/mol increments. Cholesterol was collapsed into three clinically relevant groups (<5.0, 5.0-6.9, and ≥7.0mmol/L). Systolic blood pressure was collapsed into two clinically relevant groups based on NICE guidelines for hypertension (<140 and ≥140 mmHg) as was diastolic blood pressure (<90 and ≥90 mmHg) (27).

\*The incidence was calculated among females only.

\*Note, n<5 cannot be published.

**Supplementary Table S4.** Descriptive statistics for cholesterol, blood pressure, and ethnicity for observed (non-missing) development data and final development data (including observed and imputed).

| Variable                        | Dataset          | Mean   | Std. Dev. |
|---------------------------------|------------------|--------|-----------|
| Cholesterol (mmol/L)            | Observed         | 5.23   | 1.19      |
|                                 | Observed+Imputed | 5.26   | 1.19      |
| Systolic blood pressure (mmHg)  | Observed         | 138.02 | 18.57     |
|                                 | Observed+Imputed | 137.80 | 18.59     |
| Diastolic blood pressure (mmHg) | Observed         | 79.92  | 11.01     |
|                                 | Observed+Imputed | 80.21  | 11.01     |
| White Ethnicity (proportion)    | Observed         | 0.87   | 0.34      |
|                                 | Observed+Imputed | 0.87   | 0.33      |

**Observed+Imputed comprises the final data. The distribution of the observed data with the observed+imputed data overlaid was visually examined and no large differences were seen.**



Supplementary Figure S1. Participant flow diagram.

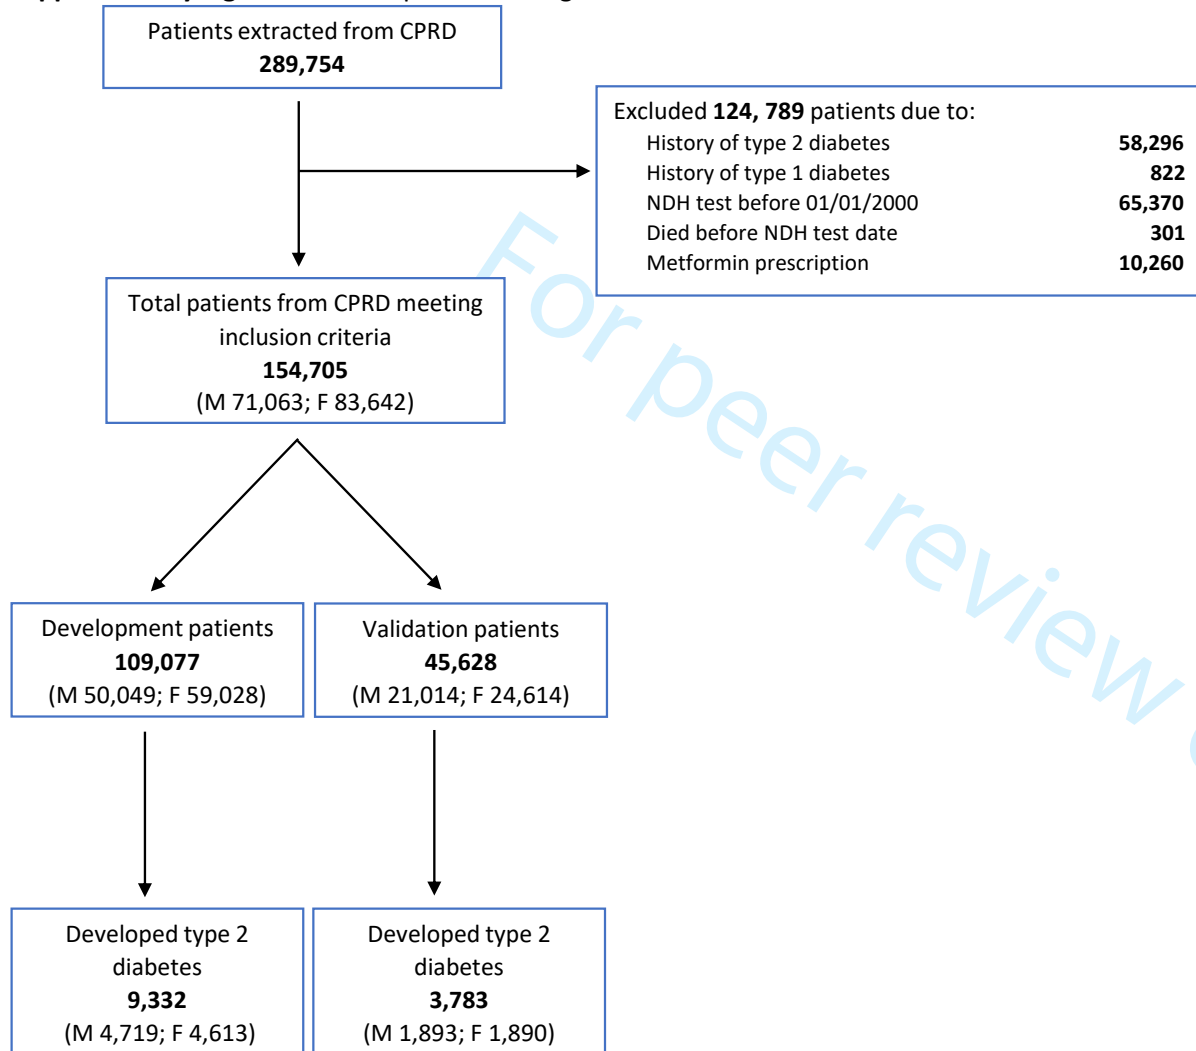

Supplementary Figure S2. Distribution of continuous variables for the development and validation datasets.

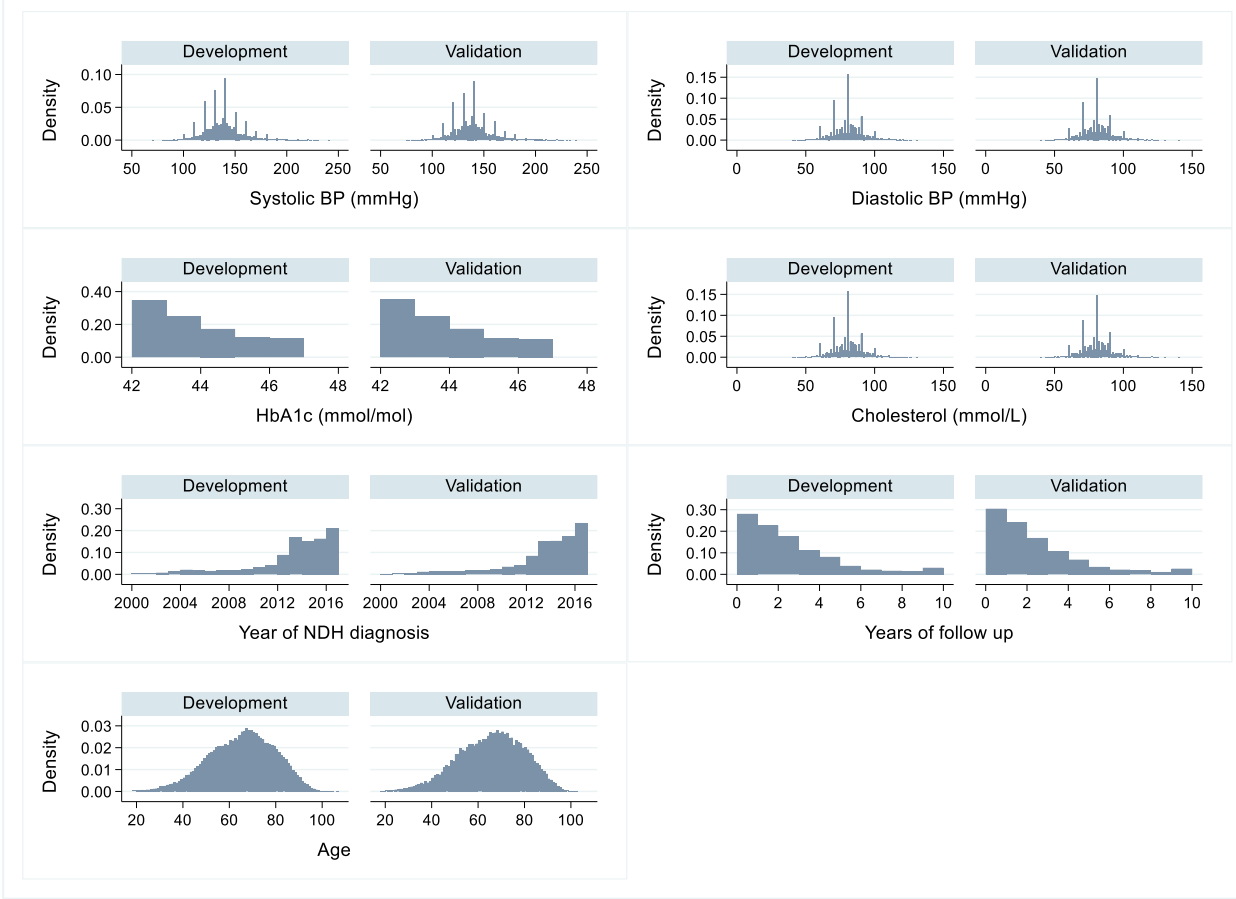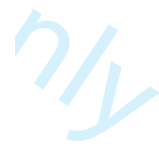

Supplementary Figure S3. Calibration plots by 10-year Type 2 diabetes risk deciles for the male and female models in one of the imputed validation datasets.

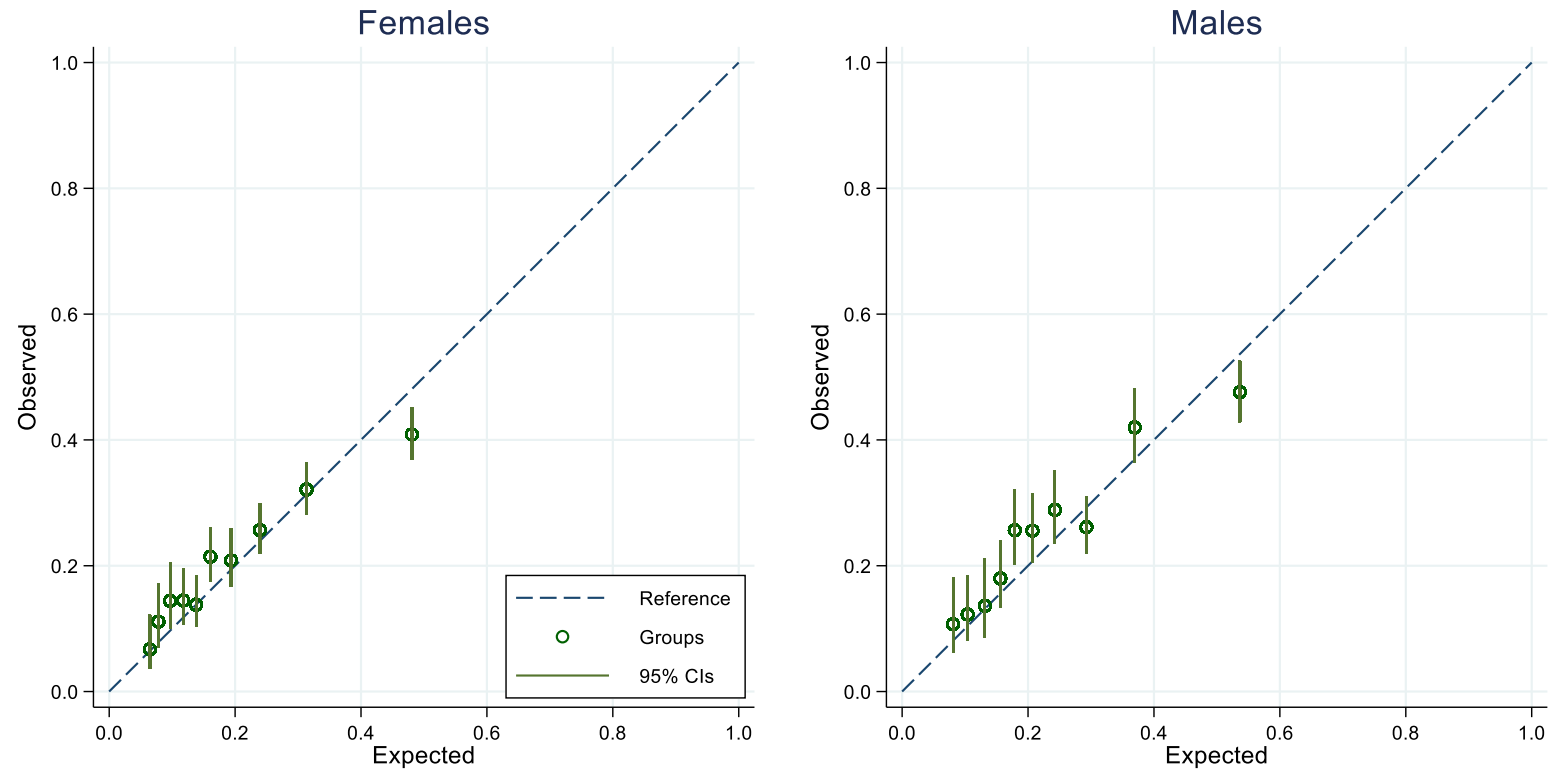

**Supplementary Figure S4.** Kaplan-Meier Type 2 diabetes-free probability and 95% confidence intervals for the male and female models in one of the imputed validation datasets.

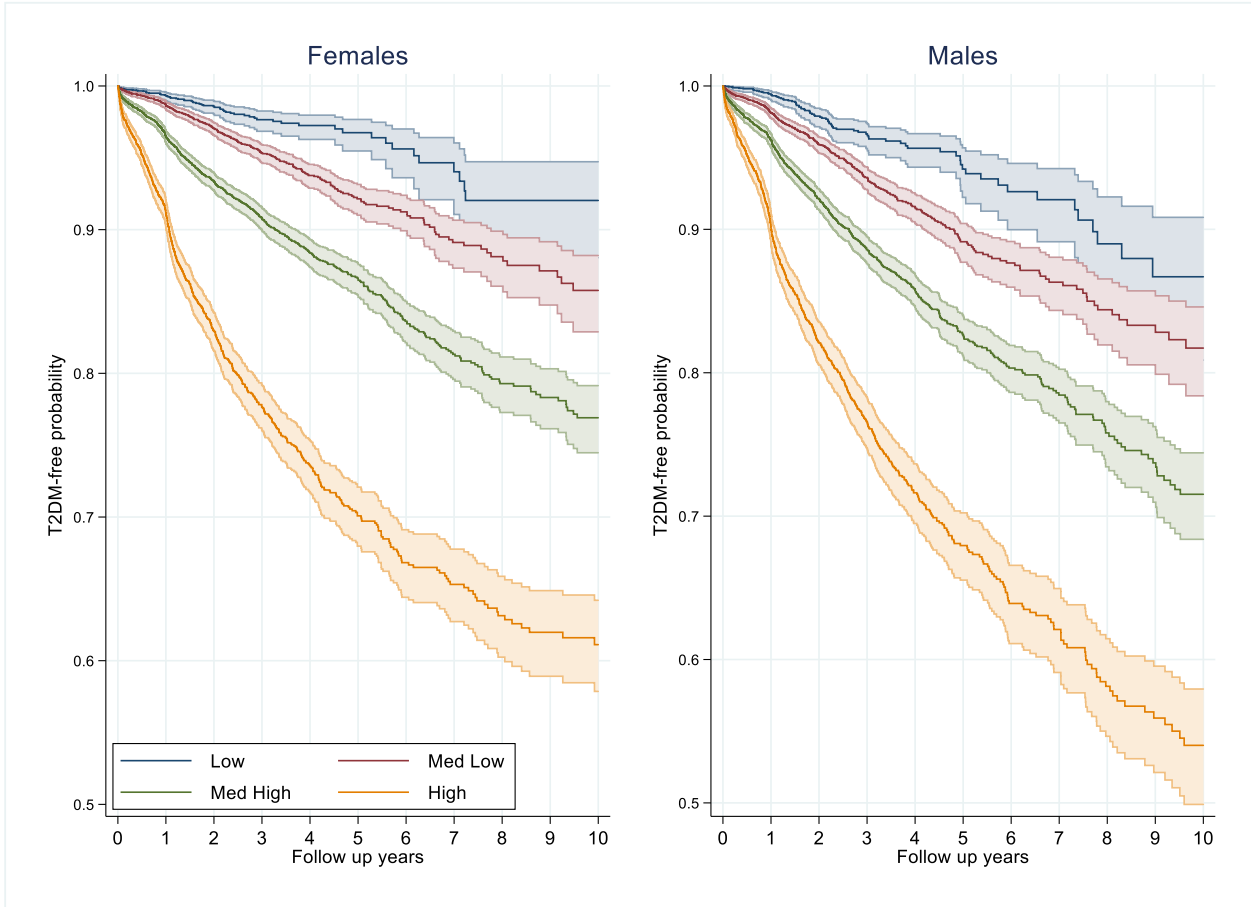

**The RECORD statement – checklist of items, extended from the STROBE statement, that should be reported in observational studies using routinely collected health data.**

|                           | Item No. | STROBE items                                                                                                                                                                               | Location in manuscript where items are reported | RECORD items                                                                                                                                                                                                                                                                                                                                                                                                                                | Location in manuscript where items are reported |
|---------------------------|----------|--------------------------------------------------------------------------------------------------------------------------------------------------------------------------------------------|-------------------------------------------------|---------------------------------------------------------------------------------------------------------------------------------------------------------------------------------------------------------------------------------------------------------------------------------------------------------------------------------------------------------------------------------------------------------------------------------------------|-------------------------------------------------|
| <b>Title and abstract</b> |          |                                                                                                                                                                                            |                                                 |                                                                                                                                                                                                                                                                                                                                                                                                                                             |                                                 |
|                           | 1        | (a) Indicate the study's design with a commonly used term in the title or the abstract (b) Provide in the abstract an informative and balanced summary of what was done and what was found |                                                 | RECORD 1.1: The type of data used should be specified in the title or abstract. When possible, the name of the databases used should be included.<br><br>RECORD 1.2: If applicable, the geographic region and timeframe within which the study took place should be reported in the title or abstract.<br><br>RECORD 1.3: If linkage between databases was conducted for the study, this should be clearly stated in the title or abstract. | Pg 1-2<br><br>Pg 2<br><br>NA                    |
| <b>Introduction</b>       |          |                                                                                                                                                                                            |                                                 |                                                                                                                                                                                                                                                                                                                                                                                                                                             |                                                 |
| Background rationale      | 2        | Explain the scientific background and rationale for the investigation being reported                                                                                                       |                                                 |                                                                                                                                                                                                                                                                                                                                                                                                                                             | Pg 4-5                                          |
| Objectives                | 3        | State specific objectives, including any prespecified hypotheses                                                                                                                           |                                                 |                                                                                                                                                                                                                                                                                                                                                                                                                                             | Pg 5                                            |
| <b>Methods</b>            |          |                                                                                                                                                                                            |                                                 |                                                                                                                                                                                                                                                                                                                                                                                                                                             |                                                 |
| Study Design              | 4        | Present key elements of study design early in the paper                                                                                                                                    |                                                 |                                                                                                                                                                                                                                                                                                                                                                                                                                             | Pg 6                                            |
| Setting                   | 5        | Describe the setting, locations, and relevant dates, including periods of recruitment, exposure, follow-up, and data collection                                                            |                                                 |                                                                                                                                                                                                                                                                                                                                                                                                                                             | Pg 6-7                                          |

|                                                                                                                                                                                                            |          |                                                                                                                                                                                                                                                                                                                                                                                                                                                                                                                                                                                                                                                                                                                        |  |                                                                                                                                                                                                                                                                                                                                                                                                                                                                                                                                                                                                                                                                                                      |                                                                           |
|------------------------------------------------------------------------------------------------------------------------------------------------------------------------------------------------------------|----------|------------------------------------------------------------------------------------------------------------------------------------------------------------------------------------------------------------------------------------------------------------------------------------------------------------------------------------------------------------------------------------------------------------------------------------------------------------------------------------------------------------------------------------------------------------------------------------------------------------------------------------------------------------------------------------------------------------------------|--|------------------------------------------------------------------------------------------------------------------------------------------------------------------------------------------------------------------------------------------------------------------------------------------------------------------------------------------------------------------------------------------------------------------------------------------------------------------------------------------------------------------------------------------------------------------------------------------------------------------------------------------------------------------------------------------------------|---------------------------------------------------------------------------|
| <p>1<br/>2<br/>3<br/>4<br/>5<br/>6<br/>7<br/>8<br/>9<br/>10<br/>11<br/>12<br/>13<br/>14<br/>15<br/>16<br/>17<br/>18<br/>19<br/>20<br/>21<br/>22<br/>23<br/>24<br/>25<br/>26<br/>27</p> <p>Participants</p> | <p>6</p> | <p>(a) <i>Cohort study</i> - Give the eligibility criteria, and the sources and methods of selection of participants. Describe methods of follow-up<br/> <i>Case-control study</i> - Give the eligibility criteria, and the sources and methods of case ascertainment and control selection. Give the rationale for the choice of cases and controls<br/> <i>Cross-sectional study</i> - Give the eligibility criteria, and the sources and methods of selection of participants</p> <p>(b) <i>Cohort study</i> - For matched studies, give matching criteria and number of exposed and unexposed<br/> <i>Case-control study</i> - For matched studies, give matching criteria and the number of controls per case</p> |  | <p>RECORD 6.1: The methods of study population selection (such as codes or algorithms used to identify subjects) should be listed in detail. If this is not possible, an explanation should be provided.</p> <p>RECORD 6.2: Any validation studies of the codes or algorithms used to select the population should be referenced. If validation was conducted for this study and not published elsewhere, detailed methods and results should be provided.</p> <p>RECORD 6.3: If the study involved linkage of databases, consider use of a flow diagram or other graphical display to demonstrate the data linkage process, including the number of individuals with linked data at each stage.</p> | <p>Pg 6-8, link to code lists provided on Pg 22</p> <p>NA</p> <p>Pg 6</p> |
| <p>28<br/>29<br/>30<br/>31<br/>32<br/>33<br/>34</p> <p>Variables</p>                                                                                                                                       | <p>7</p> | <p>Clearly define all outcomes, exposures, predictors, potential confounders, and effect modifiers. Give diagnostic criteria, if applicable.</p>                                                                                                                                                                                                                                                                                                                                                                                                                                                                                                                                                                       |  | <p>RECORD 7.1: A complete list of codes and algorithms used to classify exposures, outcomes, confounders, and effect modifiers should be provided. If these cannot be reported, an explanation should be provided.</p>                                                                                                                                                                                                                                                                                                                                                                                                                                                                               | <p>link to code lists provided on Pg 22</p>                               |
| <p>35<br/>36<br/>37<br/>38<br/>39<br/>40<br/>41<br/>42</p> <p>Data sources/<br/>measurement</p>                                                                                                            | <p>8</p> | <p>For each variable of interest, give sources of data and details of methods of assessment (measurement). Describe comparability of assessment methods if there is more than one group</p>                                                                                                                                                                                                                                                                                                                                                                                                                                                                                                                            |  |                                                                                                                                                                                                                                                                                                                                                                                                                                                                                                                                                                                                                                                                                                      | <p>Pg 6-8</p>                                                             |

|                                                                                                                                              |                                  |    |                                                                                                                                                                                                                                                                                                                                                                                                                                                                                                                                                                      |                                                                                                                                                       |                 |
|----------------------------------------------------------------------------------------------------------------------------------------------|----------------------------------|----|----------------------------------------------------------------------------------------------------------------------------------------------------------------------------------------------------------------------------------------------------------------------------------------------------------------------------------------------------------------------------------------------------------------------------------------------------------------------------------------------------------------------------------------------------------------------|-------------------------------------------------------------------------------------------------------------------------------------------------------|-----------------|
| 1<br>2<br>3<br>4<br>5<br>6<br>7<br>8<br>9<br>10                                                                                              | Bias                             | 9  | Describe any efforts to address potential sources of bias                                                                                                                                                                                                                                                                                                                                                                                                                                                                                                            |                                                                                                                                                       | Pg 18-19        |
| 11<br>12<br>13<br>14<br>15<br>16<br>17<br>18<br>19<br>20<br>21<br>22<br>23<br>24<br>25<br>26<br>27<br>28<br>29<br>30<br>31<br>32<br>33<br>34 | Study size                       | 10 | Explain how the study size was arrived at                                                                                                                                                                                                                                                                                                                                                                                                                                                                                                                            |                                                                                                                                                       | Pg 7            |
| 35<br>36<br>37<br>38<br>39<br>40<br>41<br>42<br>43<br>44                                                                                     | Quantitative variables           | 11 | Explain how quantitative variables were handled in the analyses. If applicable, describe which groupings were chosen, and why                                                                                                                                                                                                                                                                                                                                                                                                                                        |                                                                                                                                                       | NA              |
| 45<br>46<br>47                                                                                                                               | Statistical methods              | 12 | (a) Describe all statistical methods, including those used to control for confounding<br>(b) Describe any methods used to examine subgroups and interactions<br>(c) Explain how missing data were addressed<br>(d) <i>Cohort study</i> - If applicable, explain how loss to follow-up was addressed<br><i>Case-control study</i> - If applicable, explain how matching of cases and controls was addressed<br><i>Cross-sectional study</i> - If applicable, describe analytical methods taking account of sampling strategy<br>(e) Describe any sensitivity analyses |                                                                                                                                                       | Pg 6-11         |
|                                                                                                                                              | Data access and cleaning methods |    | ..                                                                                                                                                                                                                                                                                                                                                                                                                                                                                                                                                                   | RECORD 12.1: Authors should describe the extent to which the investigators had access to the database population used to create the study population. | Pg 6, Figure S1 |

|                  |    |                                                                                                                                                                                                                                                                                                                                                 |  |                                                                                                                                                                                                                                                                                                                    |                                                                                                            |
|------------------|----|-------------------------------------------------------------------------------------------------------------------------------------------------------------------------------------------------------------------------------------------------------------------------------------------------------------------------------------------------|--|--------------------------------------------------------------------------------------------------------------------------------------------------------------------------------------------------------------------------------------------------------------------------------------------------------------------|------------------------------------------------------------------------------------------------------------|
|                  |    |                                                                                                                                                                                                                                                                                                                                                 |  | RECORD 12.2: Authors should provide information on the data cleaning methods used in the study.                                                                                                                                                                                                                    | Pg 7                                                                                                       |
| Linkage          |    | ..                                                                                                                                                                                                                                                                                                                                              |  | RECORD 12.3: State whether the study included person-level, institutional-level, or other data linkage across two or more databases. The methods of linkage and methods of linkage quality evaluation should be provided.                                                                                          | Pg 6<br>Linkage was not performed by the research team, rather linked data are obtained from CPRD directly |
| <b>Results</b>   |    |                                                                                                                                                                                                                                                                                                                                                 |  |                                                                                                                                                                                                                                                                                                                    |                                                                                                            |
| Participants     | 13 | (a) Report the numbers of individuals at each stage of the study ( <i>e.g.</i> , numbers potentially eligible, examined for eligibility, confirmed eligible, included in the study, completing follow-up, and analysed)<br>(b) Give reasons for non-participation at each stage.<br>(c) Consider use of a flow diagram                          |  | RECORD 13.1: Describe in detail the selection of the persons included in the study ( <i>i.e.</i> , study population selection) including filtering based on data quality, data availability and linkage. The selection of included persons can be described in the text and/or by means of the study flow diagram. | Pg 5                                                                                                       |
| Descriptive data | 14 | (a) Give characteristics of study participants ( <i>e.g.</i> , demographic, clinical, social) and information on exposures and potential confounders<br>(b) Indicate the number of participants with missing data for each variable of interest<br>(c) <i>Cohort study</i> - summarise follow-up time ( <i>e.g.</i> , average and total amount) |  |                                                                                                                                                                                                                                                                                                                    | Table 2                                                                                                    |
| Outcome data     | 15 | <i>Cohort study</i> - Report numbers of outcome events or summary measures over time<br><i>Case-control study</i> - Report numbers in each exposure                                                                                                                                                                                             |  |                                                                                                                                                                                                                                                                                                                    | Figure S1                                                                                                  |

1  
2  
3  
4  
5  
6  
7  
8  
9  
10  
11  
12  
13  
14  
15  
16  
17  
18  
19  
20  
21  
22  
23  
24  
25  
26  
27  
28  
29  
30  
31  
32  
33  
34  
35  
36  
37  
38  
39  
40  
41  
42  
43  
44  
45  
46  
47



|                   |    |                                                                                                                                                                                                                                                                                                                                                                                                                 |  |                                                                                                                                                                                                                                                                                                          |                                                 |
|-------------------|----|-----------------------------------------------------------------------------------------------------------------------------------------------------------------------------------------------------------------------------------------------------------------------------------------------------------------------------------------------------------------------------------------------------------------|--|----------------------------------------------------------------------------------------------------------------------------------------------------------------------------------------------------------------------------------------------------------------------------------------------------------|-------------------------------------------------|
|                   |    | category, or summary measures of exposure<br><i>Cross-sectional study</i> - Report numbers of outcome events or summary measures                                                                                                                                                                                                                                                                                |  |                                                                                                                                                                                                                                                                                                          |                                                 |
| Main results      | 16 | (a) Give unadjusted estimates and, if applicable, confounder-adjusted estimates and their precision (e.g., 95% confidence interval). Make clear which confounders were adjusted for and why they were included<br>(b) Report category boundaries when continuous variables were categorized<br>(c) If relevant, consider translating estimates of relative risk into absolute risk for a meaningful time period |  |                                                                                                                                                                                                                                                                                                          | Table 3<br><br>Supp. Table S3 caption<br><br>NA |
| Other analyses    | 17 | Report other analyses done— e.g., analyses of subgroups and interactions, and sensitivity analyses                                                                                                                                                                                                                                                                                                              |  |                                                                                                                                                                                                                                                                                                          | NA                                              |
| <b>Discussion</b> |    |                                                                                                                                                                                                                                                                                                                                                                                                                 |  |                                                                                                                                                                                                                                                                                                          |                                                 |
| Key results       | 18 | Summarise key results with reference to study objectives                                                                                                                                                                                                                                                                                                                                                        |  |                                                                                                                                                                                                                                                                                                          | Pg 12-16                                        |
| Limitations       | 19 | Discuss limitations of the study, taking into account sources of potential bias or imprecision. Discuss both direction and magnitude of any potential bias                                                                                                                                                                                                                                                      |  | RECORD 19.1: Discuss the implications of using data that were not created or collected to answer the specific research question(s). Include discussion of misclassification bias, unmeasured confounding, missing data, and changing eligibility over time, as they pertain to the study being reported. | Pg 13                                           |
| Interpretation    | 20 | Give a cautious overall interpretation of results considering objectives,                                                                                                                                                                                                                                                                                                                                       |  |                                                                                                                                                                                                                                                                                                          | Pg 17-20                                        |

|                                                           |    |                                                                                                                                                               |  |                                                                                                                                                          |       |
|-----------------------------------------------------------|----|---------------------------------------------------------------------------------------------------------------------------------------------------------------|--|----------------------------------------------------------------------------------------------------------------------------------------------------------|-------|
|                                                           |    | limitations, multiplicity of analyses, results from similar studies, and other relevant evidence                                                              |  |                                                                                                                                                          |       |
| Generalisability                                          | 21 | Discuss the generalisability (external validity) of the study results                                                                                         |  |                                                                                                                                                          | Pg 20 |
| <b>Other Information</b>                                  |    |                                                                                                                                                               |  |                                                                                                                                                          |       |
| Funding                                                   | 22 | Give the source of funding and the role of the funders for the present study and, if applicable, for the original study on which the present article is based |  |                                                                                                                                                          | Pg 21 |
| Accessibility of protocol, raw data, and programming code |    | ..                                                                                                                                                            |  | RECORD 22.1: Authors should provide information on how to access any supplemental information such as the study protocol, raw data, or programming code. | Pg 22 |

\*Reference: Benchimol EI, Smeeth L, Guttman A, Harron K, Moher D, Petersen I, Sørensen HT, von Elm E, Langan SM, the RECORD Working Committee. The REporting of studies Conducted using Observational Routinely-collected health Data (RECORD) Statement. *PLoS Medicine* 2015; in press.

\*Checklist is protected under Creative Commons Attribution ([CC BY](https://creativecommons.org/licenses/by/4.0/)) license.

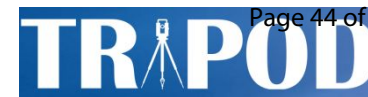

TRIPOD Checklist: Prediction Model Development and Validation

| Section/Topic                | Item | Checklist Item | Page                                                                                                                                                                                                  |            |
|------------------------------|------|----------------|-------------------------------------------------------------------------------------------------------------------------------------------------------------------------------------------------------|------------|
| <b>Title and abstract</b>    |      |                |                                                                                                                                                                                                       |            |
| Title                        | 1    | D;V            | Identify the study as developing and/or validating a multivariable prediction model, the target population, and the outcome to be predicted.                                                          | 1          |
| Abstract                     | 2    | D;V            | Provide a summary of objectives, study design, setting, participants, sample size, predictors, outcome, statistical analysis, results, and conclusions.                                               | 2-3        |
| <b>Introduction</b>          |      |                |                                                                                                                                                                                                       |            |
| Background and objectives    | 3a   | D;V            | Explain the medical context (including whether diagnostic or prognostic) and rationale for developing or validating the multivariable prediction model, including references to existing models.      | 4-5        |
|                              | 3b   | D;V            | Specify the objectives, including whether the study describes the development or validation of the model or both.                                                                                     | 5          |
| <b>Methods</b>               |      |                |                                                                                                                                                                                                       |            |
| Source of data               | 4a   | D;V            | Describe the study design or source of data (e.g., randomized trial, cohort, or registry data), separately for the development and validation data sets, if applicable.                               | 6          |
|                              | 4b   | D;V            | Specify the key study dates, including start of accrual; end of accrual; and, if applicable, end of follow-up.                                                                                        | 6          |
| Participants                 | 5a   | D;V            | Specify key elements of the study setting (e.g., primary care, secondary care, general population) including number and location of centres.                                                          | 6          |
|                              | 5b   | D;V            | Describe eligibility criteria for participants.                                                                                                                                                       | 6          |
|                              | 5c   | D;V            | Give details of treatments received, if relevant.                                                                                                                                                     | NA         |
| Outcome                      | 6a   | D;V            | Clearly define the outcome that is predicted by the prediction model, including how and when assessed.                                                                                                | 7-8        |
|                              | 6b   | D;V            | Report any actions to blind assessment of the outcome to be predicted.                                                                                                                                | NA         |
| Predictors                   | 7a   | D;V            | Clearly define all predictors used in developing or validating the multivariable prediction model, including how and when they were measured.                                                         | 8-9        |
|                              | 7b   | D;V            | Report any actions to blind assessment of predictors for the outcome and other predictors.                                                                                                            | NA         |
| Sample size                  | 8    | D;V            | Explain how the study size was arrived at.                                                                                                                                                            | 7          |
| Missing data                 | 9    | D;V            | Describe how missing data were handled (e.g., complete-case analysis, single imputation, multiple imputation) with details of any imputation method.                                                  | 9          |
| Statistical analysis methods | 10a  | D              | Describe how predictors were handled in the analyses.                                                                                                                                                 | 8-9        |
|                              | 10b  | D              | Specify type of model, all model-building procedures (including any predictor selection), and method for internal validation.                                                                         | 9-10       |
|                              | 10c  | V              | For validation, describe how the predictions were calculated.                                                                                                                                         | 10-11      |
|                              | 10d  | D;V            | Specify all measures used to assess model performance and, if relevant, to compare multiple models.                                                                                                   | 11         |
|                              | 10e  | V              | Describe any model updating (e.g., recalibration) arising from the validation, if done.                                                                                                               | 11         |
| Risk groups                  | 11   | D;V            | Provide details on how risk groups were created, if done.                                                                                                                                             | 11         |
| Development vs. validation   | 12   | V              | For validation, identify any differences from the development data in setting, eligibility criteria, outcome, and predictors.                                                                         | 10         |
| <b>Results</b>               |      |                |                                                                                                                                                                                                       |            |
| Participants                 | 13a  | D;V            | Describe the flow of participants through the study, including the number of participants with and without the outcome and, if applicable, a summary of the follow-up time. A diagram may be helpful. | Fig S1     |
|                              | 13b  | D;V            | Describe the characteristics of the participants (basic demographics, clinical features, available predictors), including the number of participants with missing data for predictors and outcome.    | Tab 2      |
|                              | 13c  | V              | For validation, show a comparison with the development data of the distribution of important variables (demographics, predictors and outcome).                                                        | Sup Fig S2 |
| Model development            | 14a  | D              | Specify the number of participants and outcome events in each analysis.                                                                                                                               | Fig S1     |
|                              | 14b  | D              | If done, report the unadjusted association between each candidate predictor and outcome.                                                                                                              | NA         |
| Model specification          | 15a  | D              | Present the full prediction model to allow predictions for individuals (i.e., all regression coefficients, and model intercept or baseline survival at a given time point).                           | Tab 3      |
|                              | 15b  | D              | Explain how to use the prediction model.                                                                                                                                                              | 13         |
| Model performance            | 16   | D;V            | Report performance measures (with CIs) for the prediction model.                                                                                                                                      | Tab 4      |
| Model-updating               | 17   | V              | If done, report the results from any model updating (i.e., model specification, model performance).                                                                                                   | 19-20      |
| <b>Discussion</b>            |      |                |                                                                                                                                                                                                       |            |
| Limitations                  | 18   | D;V            | Discuss any limitations of the study (such as nonrepresentative sample, few events per predictor, missing data).                                                                                      | 13         |
| Interpretation               | 19a  | V              | For validation, discuss the results with reference to performance in the development data, and any other validation data.                                                                             | Tab 4      |
|                              | 19b  | D;V            | Give an overall interpretation of the results, considering objectives, limitations, results from similar studies, and other relevant evidence.                                                        | 18-19      |
| Implications                 | 20   | D;V            | Discuss the potential clinical use of the model and implications for future research.                                                                                                                 | 20         |
| <b>Other information</b>     |      |                |                                                                                                                                                                                                       |            |
| Supplementary information    | 21   | D;V            | Provide information about the availability of supplementary resources, such as study protocol, Web calculator, and data sets.                                                                         | 22         |
| Funding                      | 22   | D;V            | Give the source of funding and the role of the funders for the present study.                                                                                                                         | 21         |

\*Items relevant only to the development of a prediction model are denoted by D, items relating solely to a validation of a prediction model are denoted by V, and items relating to both are denoted D;V. We recommend using the TRIPOD Checklist in conjunction with the TRIPOD Explanation and Elaboration document.
