# Supplementary material for: Prediction of type 2 diabetes risk in people with non-diabetic hyperglycaemia: model derivation and validation using UK primary care data
Source: PubMed Central journal article supplement (PMC7590356; doi:10.1136/bmjopen-2020-037937), 2020-10-23

**Supplementary Figure S2.** Distribution of continuous variables for the development and validation datasets.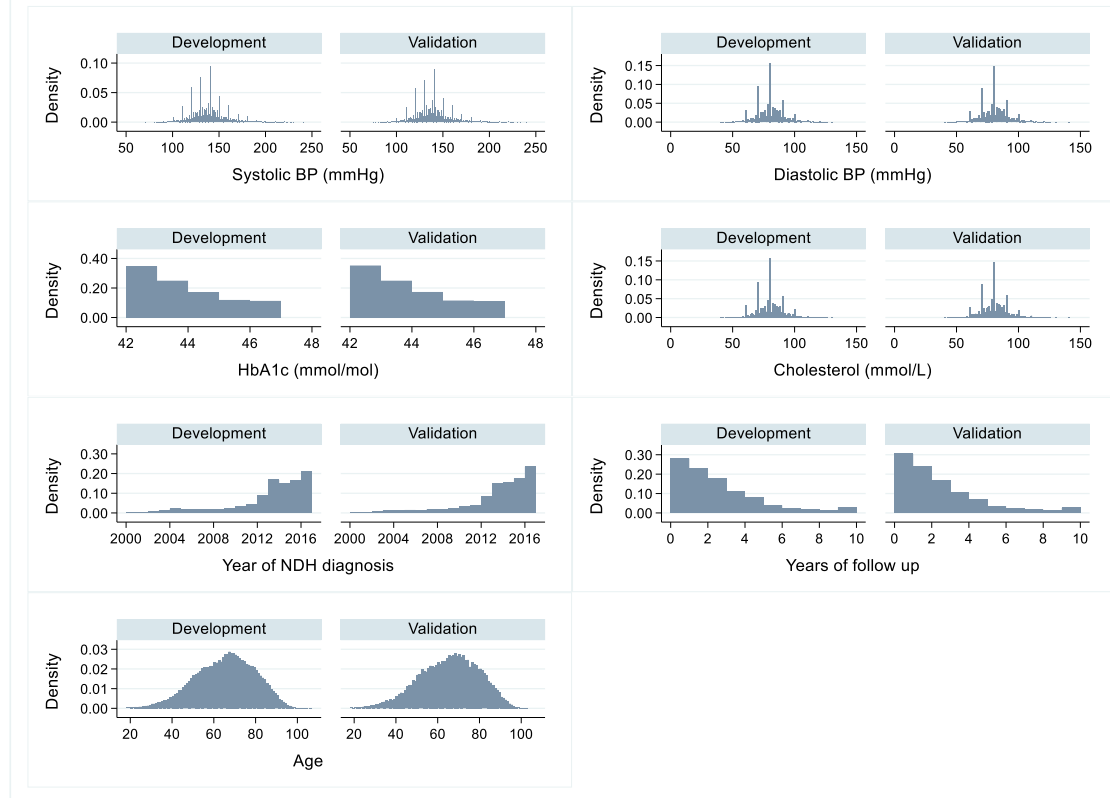

Supplement: bmjopen-2020-037937supp002.pdf [file bmjopen-2020-037937supp002.pdf]
