# Supplementary material for: Prediction of type 2 diabetes risk in people with non-diabetic hyperglycaemia: model derivation and validation using UK primary care data
Source: PubMed Central journal article supplement (PMC7590356; doi:10.1136/bmjopen-2020-037937), 2020-10-23

**Supplementary Figure S3.** Calibration plots by 10-year Type 2 diabetes risk deciles for the male and female models in one of the imputed validation datasets.

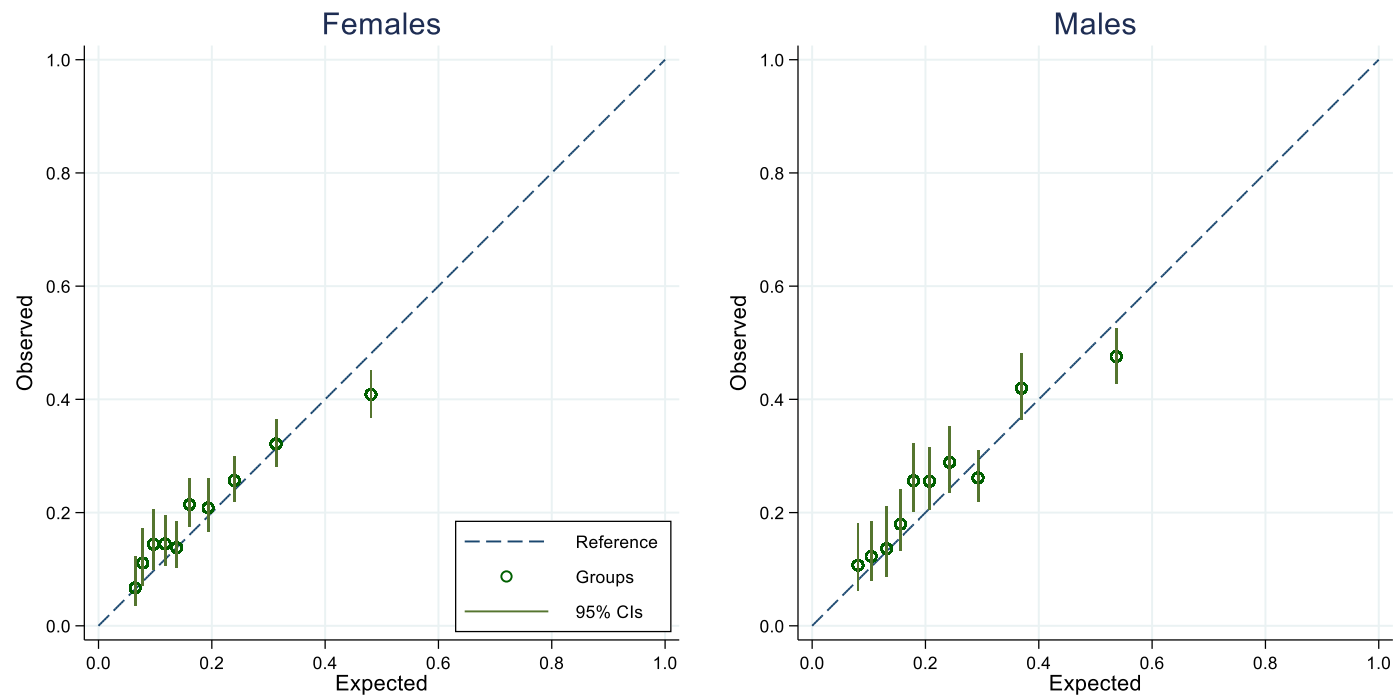

Supplement: bmjopen-2020-037937supp003.pdf [file bmjopen-2020-037937supp003.pdf]
