# Supplementary material for: Prediction of type 2 diabetes risk in people with non-diabetic hyperglycaemia: model derivation and validation using UK primary care data
Source: PubMed Central journal article supplement (PMC7590356; doi:10.1136/bmjopen-2020-037937), 2020-10-23
Supplement: bmjopen-2020-037937supp005.pdf [file bmjopen-2020-037937supp005.pdf]

**Supplementary Table S1.** Number of practices by region in total and included in the development and validation datasets.

| Practice region        | Total      | Dataset     |            |
|------------------------|------------|-------------|------------|
|                        |            | Development | Validation |
| North East             | 11         | 8           | 3          |
| North West             | 85         | 60          | 26         |
| Yorkshire & The Humber | 28         | 20          | 8          |
| East Midlands          | 25         | 18          | 8          |
| West Midlands          | 61         | 43          | 18         |
| East of England        | 54         | 38          | 16         |
| South West             | 61         | 43          | 18         |
| South Central          | 56         | 39          | 17         |
| London                 | 95         | 67          | 29         |
| South East Coast       | 68         | 48          | 20         |
| Northern Ireland       | 25         | 18          | 8          |
| Scotland               | 94         | 66          | 28         |
| Wales                  | 77         | 54          | 23         |
| <b>Total</b>           | <b>740</b> | <b>518</b>  | <b>222</b> |
