# Supplementary material for: Prediction of type 2 diabetes risk in people with non-diabetic hyperglycaemia: model derivation and validation using UK primary care data
Source: PubMed Central journal article supplement (PMC7590356; doi:10.1136/bmjopen-2020-037937), 2020-10-23
Supplement: bmjopen-2020-037937supp006.pdf [file bmjopen-2020-037937supp006.pdf]

**Supplementary Table S2.** Percent of patients missing potential predictor variables.

| Predictor variable               | Missing |      |
|----------------------------------|---------|------|
|                                  | n       | %    |
| Waist circumference              | 153,592 | 99.3 |
| Liver function test              | 153,493 | 99.2 |
| Pulse rate                       | 133,890 | 86.5 |
| BMI                              | 113,840 | 73.6 |
| Index of Multiple Deprivation    | 63,524  | 41.1 |
| Systolic blood pressure          | 48,390  | 31.3 |
| Diastolic blood pressure         | 48,390  | 31.3 |
| Ethnicity                        | 41,121  | 26.6 |
| Serum cholesterol                | 38,910  | 25.2 |
| HbA1c                            | 0       | 0    |
| Age                              | 0       | 0    |
| Sex                              | 0       | 0    |
| Current alcohol use              | 0       | 0    |
| Current smoker                   | 0       | 0    |
| Antihypertensives                | 0       | 0    |
| Atypical antipsychotics          | 0       | 0    |
| Aspirin                          | 0       | 0    |
| Corticosteroids                  | 0       | 0    |
| Statins                          | 0       | 0    |
| Bipolar disease or schizophrenia | 0       | 0    |
| Cardiovascular disease           | 0       | 0    |
| Depression                       | 0       | 0    |
| Learning disability              | 0       | 0    |
| Diabetes in family               | 0       | 0    |
| Polycystic ovarian syndrome      | 0       | 0    |
| Gestational diabetes             | 0       | 0    |
| Renal/kidney disease             | 0       | 0    |
| Sleep apnoea                     | 0       | 0    |
