# Supplementary material for: Prediction of type 2 diabetes risk in people with non-diabetic hyperglycaemia: model derivation and validation using UK primary care data
Source: PubMed Central journal article supplement (PMC7590356; doi:10.1136/bmjopen-2020-037937), 2020-10-23
Supplement: bmjopen-2020-037937supp007.pdf [file bmjopen-2020-037937supp007.pdf]

**Supplementary Table S3.** Incidence of Type 2 diabetes per 1,000 person years with 95% confidence intervals.

|                         |           | Dataset   |        |                  |             |       |                  |            |       |                  |
|-------------------------|-----------|-----------|--------|------------------|-------------|-------|------------------|------------|-------|------------------|
|                         |           | Total     |        |                  | Development |       |                  | Validation |       |                  |
|                         |           | Py        | n      | Rate (95% CI)    | Py          | n     | Rate (95% CI)    | Py         | n     | Rate (95% CI)    |
| Total                   |           | 408,350.5 | 13,115 | 32.1 (31.6-32.7) | 293,237.8   | 9,332 | 31.8 (31.2-32.5) | 115,112.6  | 3,783 | 32.9 (31.8-33.9) |
| Age group               | <30       | 4,285.1   | 79     | 18.4 (14.8-23.0) | 3,017.0     | 56    | 18.6 (14.3-24.1) | 1,268.1    | 23    | 18.1 (12.1-27.3) |
|                         | 30-39     | 15,214.7  | 307    | 20.2 (18.0-22.6) | 11,050.8    | 231   | 20.9 (18.4-23.8) | 4,164.0    | 76    | 18.3 (14.6-22.9) |
|                         | 40-49     | 43,354.3  | 1,157  | 26.7 (25.2-28.3) | 31,539.3    | 836   | 26.5 (24.8-28.4) | 11,815.0   | 321   | 27.2 (24.4-30.3) |
|                         | 50-59     | 81,437.4  | 2,399  | 29.5 (28.3-30.7) | 58,691.3    | 1,730 | 29.5 (28.1-30.9) | 22,746.1   | 669   | 29.4 (27.3-31.7) |
|                         | 60-69     | 109,599.6 | 3,808  | 34.7 (33.7-35.9) | 79,177.3    | 2,709 | 34.2 (32.9-35.5) | 30,422.4   | 1,099 | 36.1 (34.1-38.3) |
|                         | 70-79     | 96,100.4  | 3,553  | 37.0 (35.8-38.2) | 68,493.3    | 2,527 | 36.9 (35.5-38.4) | 27,607.1   | 1,026 | 37.2 (35.0-39.5) |
|                         | 80-89     | 50,818.9  | 1,629  | 32.1 (30.5-33.7) | 36,072.2    | 1,114 | 30.9 (29.1-32.8) | 14,746.7   | 515   | 34.9 (32.0-38.1) |
|                         | 90+       | 7,540.0   | 183    | 24.3 (21.0-28.1) | 5,196.7     | 129   | 24.8 (20.9-29.5) | 2,343.2    | 54    | 23.0 (17.6-30.1) |
| Sex                     | Male      | 186,953.5 | 6,612  | 35.4 (34.5-36.2) | 134,390.2   | 4,719 | 35.1 (34.1-36.1) | 52,563.3   | 1,893 | 36.0 (34.4-37.7) |
|                         | Female    | 221,397.0 | 6,503  | 29.4 (28.7-30.1) | 158,847.6   | 4,613 | 29.0 (28.2-29.9) | 62,549.3   | 1,890 | 30.2 (28.9-31.6) |
| Ethnicity               | Non-white | 38,606.0  | 1,154  | 29.9 (28.2-31.7) | 29,281.3    | 863   | 29.5 (27.6-31.5) | 9,324.7    | 291   | 31.2 (27.8-35.0) |
|                         | White     | 257,231.3 | 8,446  | 32.8 (32.1-33.5) | 181,622.3   | 5,878 | 32.4 (31.5-33.2) | 75,609.0   | 2,568 | 34.0 (32.7-35.3) |
| Current alcohol user    | No        | 321,672.8 | 10,049 | 31.2 (30.6-31.9) | 231,489.6   | 7,223 | 31.2 (30.5-31.9) | 90,183.2   | 2,826 | 31.3 (30.2-32.5) |
|                         | Yes       | 86,677.6  | 3,066  | 35.4 (34.1-36.6) | 61,748.2    | 2,109 | 34.2 (32.7-35.6) | 24,929.4   | 957   | 38.4 (36.0-40.9) |
| Current smoker          | No        | 351,866.5 | 11,355 | 32.3 (31.7-32.9) | 252,907.8   | 8,103 | 32.0 (31.3-32.7) | 98,958.7   | 3,252 | 32.9 (31.8-34.0) |
|                         | Yes       | 56,483.9  | 1,760  | 31.2 (29.7-32.6) | 40,330.0    | 1,229 | 30.5 (28.8-32.2) | 16,154.0   | 531   | 32.9 (30.2-35.8) |
| Antihypertensives       | No        | 402,244.5 | 12,840 | 31.9 (31.4-32.5) | 288,800.1   | 9,137 | 31.6 (31.0-32.3) | 113,444.4  | 3,703 | 32.6 (31.6-33.7) |
|                         | Yes       | 6,105.9   | 275    | 45.0 (40.0-50.7) | 4,437.7     | 195   | 43.9 (38.2-50.6) | 1,668.3    | 80    | 48.0 (38.5-59.7) |
| Atypical antipsychotics | No        | 397,003.1 | 12,760 | 32.1 (31.6-32.7) | 284,987.3   | 9,084 | 31.9 (31.2-32.5) | 112,015.8  | 3,676 | 32.8 (31.8-33.9) |
|                         | Yes       | 11,347.4  | 355    | 31.3 (28.2-34.7) | 8,250.5     | 248   | 30.1 (26.5-34.0) | 3,096.9    | 107   | 34.6 (28.6-41.8) |
| Aspirin                 | No        | 282,265.5 | 7,971  | 28.2 (27.6-28.9) | 202,397.8   | 5,686 | 28.1 (27.4-28.8) | 79,867.7   | 2,285 | 28.6 (27.5-29.8) |
|                         | Yes       | 126,085.0 | 5,144  | 40.8 (39.7-41.9) | 90,840.0    | 3,646 | 40.1 (38.9-41.5) | 35,245.0   | 1,498 | 42.5 (40.4-44.7) |
| Corticosteroids         | No        | 132,237.8 | 3,781  | 28.6 (27.7-29.5) | 94,557.1    | 2,721 | 28.8 (27.7-29.9) | 37,680.7   | 1,060 | 28.1 (26.5-29.9) |
|                         | Yes       | 276,112.7 | 9,334  | 33.8 (33.1-34.5) | 198,680.8   | 6,611 | 33.3 (32.5-34.1) | 77,431.9   | 2,723 | 35.2 (33.9-36.5) |
| Statins                 | No        | 197,618.7 | 4,184  | 21.2 (20.5-21.8) | 141,932.3   | 2,977 | 21.0 (20.2-21.7) | 55,686.3   | 1,207 | 21.7 (20.5-22.9) |
|                         | Yes       | 210,731.8 | 8,931  | 42.4 (41.5-43.3) | 151,305.5   | 6,355 | 42.0 (41.0-43.0) | 59,426.3   | 2,576 | 43.3 (41.7-45.1) |
| Schizophrenia/bipolar   | No        | 402,889.4 | 12,937 | 32.1 (31.6-32.7) | 289,246.4   | 9,212 | 31.8 (31.2-32.5) | 113,642.9  | 3,725 | 32.8 (31.7-33.8) |
|                         | Yes       | 5,461.1   | 178    | 32.6 (28.1-37.8) | 3,991.4     | 120   | 30.1 (25.1-36.0) | 1,469.7    | 58    | 39.5 (30.5-51.0) |
| Cardiovascular disease  | No        | 361,574.5 | 11,297 | 31.2 (30.7-31.8) | 260,237.0   | 8,074 | 31.0 (30.4-31.7) | 101,337.5  | 3,223 | 31.8 (30.7-32.9) |
|                         | Yes       | 46,776.0  | 1,818  | 38.9 (37.1-40.7) | 33,000.8    | 1,258 | 38.1 (36.1-40.3) | 13,775.1   | 560   | 40.7 (37.4-44.2) |
| Depression              | No        | 303,786.2 | 9,875  | 32.5 (31.9-33.2) | 219,040.2   | 7,043 | 32.2 (31.4-32.9) | 84,746.0   | 2,832 | 33.4 (32.2-34.7) |

|                       |         |           |        |                    |           |       |                    |           |       |                   |
|-----------------------|---------|-----------|--------|--------------------|-----------|-------|--------------------|-----------|-------|-------------------|
|                       | Yes     | 104,564.3 | 3,240  | 31.0 (29.9-32.1)   | 74,197.7  | 2,289 | 30.9 (29.6-32.1)   | 30,366.6  | 951   | 31.3 (29.4-33.4)  |
| Learning disability   | No      | 406,734.9 | 13,060 | 32.1 (31.6-32.7)   | 292,204.8 | 9,301 | 31.8 (31.2-32.5)   | 114,530.1 | 3,759 | 32.8 (31.8-33.9)  |
|                       | Yes     | 1,615.6   | 55     | 34.0 (26.1-44.3)   | 1,033.0   | 31    | 30.0 (21.1-42.7)   | 582.5     | 24    | 41.2 (27.6-61.5)  |
| Diabetes in family    | No      | 407,867.0 | 13,091 | 32.1 (31.6-32.7)   | 292,821.8 | 9,311 | 31.8 (31.2-32.4)   | 115,045.1 | 3,780 | 32.9 (31.8-33.9)  |
|                       | Yes     | 483.5     | 24     | 49.6 (33.3-74.1)   | 416.0     | 21    | 50.5 (32.9-77.4)   | 67.5      | <5    | 44.4 (14.3-137.8) |
| Renal/kidney disease  | No      | 368,309.2 | 11,766 | 31.9 (31.4-32.5)   | 265,292.2 | 8,403 | 31.7 (31.0-32.4)   | 103,016.9 | 3,363 | 32.6 (31.6-33.8)  |
|                       | Yes     | 40,041.3  | 1,349  | 33.7 (31.9-35.5)   | 27,945.6  | 929   | 33.2 (31.2-35.5)   | 12,095.7  | 420   | 34.7 (31.6-38.2)  |
| Sleep apnoea          | No      | 403,300.5 | 12,896 | 32.0 (31.4-32.5)   | 289,628.0 | 9,178 | 31.7 (31.0-32.3)   | 113,672.4 | 3,718 | 32.7 (31.7-33.8)  |
|                       | Yes     | 5,050.0   | 219    | 43.4 (38.0-49.5)   | 3,609.8   | 154   | 42.7 (36.4-50.0)   | 1,440.2   | 65    | 45.1 (35.4-57.6)  |
| PCOS*                 | No      | 219,461.5 | 6,441  | 29.3 (28.6-30.1)   | 157,488.6 | 4,571 | 29.0 (28.2-29.9)   | 61,972.9  | 1,870 | 30.2 (28.8-31.6)  |
|                       | Yes     | 1,935.5   | 62     | 32.0 (25.0-41.1)   | 1,359.0   | 42    | 30.9 (22.8-41.8)   | 576.5     | 20    | 34.7 (22.4-53.8)  |
| Gestational diabetes* | No      | 219,205.1 | 6,423  | 29.3 (28.6-30.0)   | 157,163.0 | 4,550 | 29.0 (28.1-29.8)   | 62,042.1  | 1,873 | 30.2 (28.9-31.6)  |
|                       | Yes     | 2,191.9   | 80     | 36.5 (29.3-45.4)   | 1,684.7   | 63    | 37.4 (29.2-47.9)   | 507.2     | 17    | 33.5 (20.8-53.9)  |
| HbA1c (mmol/mol)      | 42      | 143,564.4 | 2,341  | 16.3 (15.7-17.0)   | 102,303.4 | 1,650 | 16.1 (15.4-16.9)   | 41,261.0  | 691   | 16.7 (15.5-18.0)  |
|                       | 43      | 103,706.7 | 2,496  | 24.1 (23.1-25.0)   | 74,289.4  | 1,762 | 23.7 (22.6-24.9)   | 29,417.3  | 734   | 25.0 (23.2-26.8)  |
|                       | 44      | 72,839.5  | 2,563  | 35.2 (33.9-36.6)   | 52,495.5  | 1,801 | 34.3 (32.8-35.9)   | 20,344.0  | 762   | 37.5 (34.9-40.2)  |
|                       | 45      | 48,523.8  | 2,407  | 49.6 (47.7-51.6)   | 35,497.9  | 1,724 | 48.6 (46.3-50.9)   | 13,025.9  | 683   | 52.4 (48.6-56.5)  |
|                       | 46      | 31,687.9  | 2,473  | 78.0 (75.0-81.2)   | 22,985.0  | 1,794 | 78.1 (74.5-81.7)   | 8,702.9   | 679   | 78.0 (72.4-84.1)  |
|                       | 47      | 8,028.2   | 835    | 104.0 (97.2-111.3) | 5,666.6   | 601   | 106.1 (97.9-114.9) | 2,361.6   | 234   | 99.1 (87.2-112.6) |
| Cholesterol (mmol/L)  | <5.0    | 130,946.3 | 4,568  | 34.9 (33.9-35.9)   | 93,611.8  | 3,273 | 35.0 (33.8-36.2)   | 37,334.5  | 1,295 | 34.7 (32.8-36.6)  |
|                       | 5.0-6.9 | 152,342.9 | 4,978  | 32.7 (31.8-33.6)   | 109,313.4 | 3,548 | 32.5 (31.4-33.5)   | 43,029.5  | 1,430 | 33.2 (31.6-35.0)  |
|                       | ≥7.0    | 24,848.2  | 817    | 32.9 (30.7-35.2)   | 17,982.7  | 573   | 31.9 (29.4-34.6)   | 6,865.5   | 244   | 35.5 (31.3-40.3)  |
| Systolic BP (mmHg)    | <140    | 147,766.9 | 4,476  | 30.3 (29.4-31.2)   | 105,813.8 | 3,195 | 30.2 (29.2-31.3)   | 41,953.1  | 1,281 | 30.5 (28.9-32.3)  |
|                       | ≥140    | 135,710.1 | 5,206  | 38.4 (37.3-39.4)   | 97,560.5  | 3,685 | 37.8 (36.6-39.0)   | 38,149.6  | 1,521 | 39.9 (37.9-41.9)  |
| Diastolic BP (mmHg)   | <90     | 228,884.2 | 7,540  | 32.9 (32.2-33.7)   | 164,236.7 | 5,367 | 32.7 (31.8-33.6)   | 64,647.6  | 2,173 | 33.6 (32.2-35.1)  |
|                       | ≥90     | 54,592.8  | 2,142  | 39.2 (37.6-40.9)   | 39,137.6  | 1,513 | 38.7 (36.8-40.7)   | 15,455.2  | 629   | 40.7 (37.6-44.0)  |

BP=blood pressure. PCOS=Polycystic ovarian syndrome.

Table includes observed values only. Imputed values for ethnicity, serum cholesterol, and systolic and diastolic blood pressure are not included.

Index of multiple deprivation, BMI, pulse, liver function test, and waist circumference are not included in the table since these measures are not available for >33.3% of the cohort.

Age was collapsed into 10-year groups. HbA1c was collapsed into one mmol/mol increments. Cholesterol was collapsed into three clinically relevant groups (<5.0, 5.0-6.9, and ≥7.0mmol/L). Systolic blood pressure was collapsed into two clinically relevant groups based on NICE guidelines for hypertension (<140 and ≥140 mmHg) as was diastolic blood pressure (<90 and ≥90 mmHg) (27).

\*The incidence was calculated among females only.

\*Note, n<5 cannot be published.
