# Supplementary material for: Prediction of type 2 diabetes risk in people with non-diabetic hyperglycaemia: model derivation and validation using UK primary care data
Source: PubMed Central journal article supplement (PMC7590356; doi:10.1136/bmjopen-2020-037937), 2020-10-23
Supplement: bmjopen-2020-037937supp008.pdf [file bmjopen-2020-037937supp008.pdf]

**Supplementary Table S4.** Descriptive statistics for cholesterol, blood pressure, and ethnicity for observed (non-missing) development data and final development data (including observed and imputed).

| Variable                        | Dataset          | Mean   | Std. Dev. |
|---------------------------------|------------------|--------|-----------|
| Cholesterol (mmol/L)            | Observed         | 5.23   | 1.19      |
|                                 | Observed+Imputed | 5.26   | 1.19      |
| Systolic blood pressure (mmHg)  | Observed         | 138.02 | 18.57     |
|                                 | Observed+Imputed | 137.80 | 18.59     |
| Diastolic blood pressure (mmHg) | Observed         | 79.92  | 11.01     |
|                                 | Observed+Imputed | 80.21  | 11.01     |
| White Ethnicity (proportion)    | Observed         | 0.87   | 0.34      |
|                                 | Observed+Imputed | 0.87   | 0.33      |

**Observed+Imputed comprises the final data. The distribution of the observed data with the observed+imputed data overlaid was visually examined and no large differences were seen.**
